# Supplementary material
Source: PubMed Central journal article supplement (PMC4980298)
Supplement: NIHMS788409-supplement-Supp_Tab_1_FimL.pdf [file NIHMS788409-supplement-Supp_Tab_1_FimL.pdf]

| Bait | Prey (Unipro MIST | Compass    | Protein.names                                         |
|------|-------------------|------------|-------------------------------------------------------|
| FimL | Q9I2S3            | 0.9161189  | 2938.62074 Uncharacterized protein                    |
| FimL | Q9HWL6            | 0.88871186 | 254.198733 Probable transcriptional regulator         |
| FimL | Q9HZ07            | 0.88352218 | 319.396902 Uncharacterized protein                    |
| FimL | Q9I698            | 0.81345267 | 361.530676 TonB3                                      |
| FimL | Q9HZA6            | 0.81112036 | 179.094754 Motility protein FimV                      |
| FimL | Q9I377            | 0.80383619 | 803.086972 Probable oxidoreductase                    |
| FimL | Q9HXN0            | 0.80323104 | 37.4649312 Uncharacterized protein                    |
| FimL | Q9HVE8            | 0.80309908 | 206.171339 Uncharacterized protein                    |
| FimL | Q9I364            | 0.79340536 | 9.47559009 Uncharacterized protein                    |
| FimL | Q9HZM1            | 0.79340526 | 19.7924499 Probable tolQ-type transport protein       |
| FimL | Q9I2S0            | 0.7895127  | 27.990751 Uncharacterized protein                     |
| FimL | P34750            | 0.78554082 | 122.349848 Fimbrial assembly protein PilQ             |
| FimL | Q9I3S3            | 0.78434783 | 58.5849606 Guanidinobutyrase (EC 3.5.3.7)             |
| FimL | Q9HT53            | 0.7802996  | 398.643876 Uncharacterized protein                    |
| FimL | Q9I2P3            | 0.77756673 | 32.5781731 Uncharacterized protein                    |
| FimL | Q9I508            | 0.77651671 | 45.9302759 Probable arsenate reductase                |
| FimL | Q9I294            | 0.77553151 | 19.7924499 Uncharacterized protein                    |
| FimL | P50599            | 0.75890852 | 16.0912576 Protein TolR                               |
| FimL | Q9HZL1            | 0.74980511 | 51.5623186 Na(+)-translocating NADH-quinone reductase |
| FimL | Q9HU41            | 0.7288793  | 33.1840058 Imidazoleglycerol-phosphate dehydratase    |
| FimL | Q9HZC0            | 0.7277511  | 182.805965 NAD kinase (EC 2.7.1.23) (ATP-dependent)   |
| FimL | Q9HUK8            | 0.72438376 | 19.5501639 Phosphatidylserine decarboxylase proenz    |
| FimL | Q9I2R7            | 0.71872639 | 21.5058132 Probable short-chain dehydrogenase         |
| FimL | Q9I2Z2            | 0.71619075 | 27.5385282 Uncharacterized protein                    |
| FimL | Q9I3I5            | 0.7147599  | 38.9131072 Cell division protein ZipA homolog         |
| FimL | Q9I6W1            | 0.7070747  | 194.408251 Uncharacterized protein                    |
| FimL | Q9HZK8            | 0.68888287 | 19.2957471 Na(+)-translocating NADH-quinone reductase |
| FimL | Q9HVF5            | 0.68551477 | 25.5337077 Uncharacterized protein                    |
| FimL | Q9I6Z7            | 0.68551445 | 7.62199122 Uncharacterized protein                    |
| FimL | Q9I2S4            | 0.68551358 | 19.9335779 Probable enoyl-CoA hydratase/isomerase     |
| FimL | Q9HV47            | 0.68551193 | 10.7791234 Uncharacterized protein                    |
| FimL | Q9I6E3            | 0.68551152 | 13.2016761 Dihydrofolate reductase (EC 1.5.1.3)       |
| FimL | Q9I2T0            | 0.68551121 | 10.7791234 Uncharacterized protein                    |
| FimL | Q9HW93            | 0.6855111  | 28.5188798 Methyl-accepting chemotaxis protein PctA   |
| FimL | Q9I3K4            | 0.68551109 | 7.62199122 Uncharacterized protein                    |
| FimL | Q9HTD4            | 0.68551101 | 7.62199122 Probable acetyltransferase                 |
| FimL | Q9HZK6            | 0.68551077 | 9.97160858 Na(+)-translocating NADH-quinone reductase |
| FimL | Q9HT56            | 0.68551076 | 13.2016761 Uncharacterized protein                    |
| FimL | Q9I4T4            | 0.68551074 | 7.62199122 Uncharacterized protein                    |
| FimL | Q9I2C7            | 0.6855107  | 7.62199122 Response regulator EraR                    |
| FimL | Q9HXC5            | 0.68551064 | 13.2016761 Probable permease of ABC transporter       |
| FimL | Q9HUB5            | 0.68551059 | 7.62199122 Sec-independent protein translocase prot   |
| FimL | Q9HX02            | 0.68551057 | 7.62199122 Ethanolamine ammonia-lyase light chain (   |
| FimL | Q9HYQ0            | 0.68551056 | 7.62199122 Uncharacterized protein                    |

|      |        |            |            |                                           |
|------|--------|------------|------------|-------------------------------------------|
| FimL | Q9HZQ4 | 0.68551056 | 7.62199122 | Phospho-2-dehydro-3-deoxyheptonate al     |
| FimL | Q9I5H6 | 0.68551055 | 4.5850787  | Uncharacterized protein                   |
| FimL | Q9HUE3 | 0.68551053 | 7.62199122 | Uncharacterized protein                   |
| FimL | Q9HUL4 | 0.68551053 | 7.62199122 | Epoxyqueuosine reductase (EC 1.1.-.-) (Qu |
| FimL | Q9I372 | 0.68551053 | 7.62199122 | Probable transcriptional regulator        |
| FimL | Q9HUX9 | 0.68551052 | 10.7791234 | Probable transcriptional regulator        |
| FimL | Q9HTQ6 | 0.68551052 | 4.65965728 | Xanthine phosphoribosyltransferase (XPR   |
| FimL | Q9HT85 | 0.68551051 | 10.7791234 | Uncharacterized protein                   |
| FimL | O86062 | 0.68551051 | 8.20971855 | NADH pyrophosphatase (EC 3.6.1.22)        |
| FimL | Q9I227 | 0.68551051 | 13.2016761 | Uncharacterized protein                   |
| FimL | Q9I427 | 0.6855105  | 6.29165318 | Cytochrome bo(3) ubiquinol oxidase subu   |
| FimL | Q9HYB0 | 0.68551049 | 7.62199122 | Uncharacterized protein                   |
| FimL | Q9HZA9 | 0.68551045 | 6.48428048 | Uncharacterized protein                   |
| FimL | Q9I6V3 | 0.68551041 | 7.62199122 | Probable two-component response regul     |
| FimL | Q9IOU7 | 0.6855104  | 7.62199122 | Probable acyltransferase                  |
| FimL | Q9HZB5 | 0.68551039 | 8.20971855 | Uncharacterized protein                   |
| FimL | Q9X6V6 | 0.68551038 | 7.62199122 | RlpA-like lipoprotein                     |
| FimL | Q9HZ84 | 0.68551038 | 7.62199122 | Uncharacterized protein                   |
| FimL | Q9HT31 | 0.68551036 | 7.62199122 | Uncharacterized protein                   |
| FimL | Q9I5A9 | 0.68551033 | 10.7791234 | Uncharacterized protein                   |
| FimL | Q9HUR4 | 0.68551033 | 7.62199122 | Probable aldehyde dehydrogenase           |
| FimL | Q9I205 | 0.68551032 | 10.7791234 | Uncharacterized protein                   |
| FimL | P42810 | 0.68551032 | 15.2439824 | TPR repeat-containing protein PA4667      |
| FimL | Q9HTJ8 | 0.68551032 | 13.2016761 | Uncharacterized protein                   |
| FimL | G3XCV9 | 0.68551032 | 7.62199122 | Probable beta-lactamase                   |
| FimL | Q9I666 | 0.68551031 | 3.33621278 | Probable stomatin-like protein            |
| FimL | Q9HXM7 | 0.68551031 | 13.2016761 | Probable metallo-oxidoreductase           |
| FimL | Q9I3J1 | 0.6855103  | 4.44887063 | Uncharacterized protein                   |
| FimL | Q9I6Q9 | 0.68551029 | 7.62199122 | Dicarboxylic acid transporter PcaT        |
| FimL | Q9HT84 | 0.68551029 | 7.62199122 | Uncharacterized protein                   |
| FimL | Q9HXG5 | 0.68551027 | 6.48428048 | Probable sodium:sulfate symporter         |
| FimL | Q9HVD3 | 0.68551027 | 7.62199122 | Probable transcriptional regulator        |
| FimL | G3XCW9 | 0.68551025 | 7.62199122 | Beta-lactamase expression regulator Amp   |
| FimL | Q59649 | 0.68551024 | 7.62199122 | N-(5'-phosphoribosyl)anthranilate isomer  |
| FimL | G3XCV7 | 0.68551022 | 5.84249194 | Penicillin-binding protein 2              |
| FimL | Q9I229 | 0.68551022 | 7.62199122 | Probable epoxide hydrolase                |
| FimL | Q9HT96 | 0.68551021 | 6.48428048 | Probable metalloprotease                  |
| FimL | G3XD70 | 0.68551021 | 4.44887063 | Uncharacterized protein                   |
| FimL | Q9I023 | 0.68551019 | 4.44887063 | Uncharacterized protein                   |
| FimL | Q9I4A2 | 0.68551017 | 4.5850787  | Probable major facilitator superfamily (M |
| FimL | Q9HZZ7 | 0.68551017 | 7.62199122 | Probable transcriptional regulator        |
| FimL | Q9HTJ6 | 0.68551017 | 4.44887063 | Probable two-component response regul     |
| FimL | Q9HZS7 | 0.68551016 | 3.33621278 | Probable chemotaxis transducer            |
| FimL | Q9HVM7 | 0.68551015 | 7.62199122 | 4-hydroxy-3-methylbut-2-enyl diphosphat   |
| FimL | Q9I783 | 0.68551015 | 7.62199122 | Uncharacterized protein PA0049            |

|      |        |            |            |                                             |
|------|--------|------------|------------|---------------------------------------------|
| FimL | Q9HXJ3 | 0.68551015 | 7.62199122 | Uncharacterized protein                     |
| FimL | Q9I6B9 | 0.68551015 | 7.62199122 | Cell division protein FtsX                  |
| FimL | Q9HZN7 | 0.68551014 | 3.33621278 | Uncharacterized protein                     |
| FimL | Q9HZ80 | 0.68551012 | 4.73988322 | Probable glycosyl transferase WbpJ          |
| FimL | G3XD29 | 0.68551012 | 4.44887063 | Na(+)/H(+) antiporter NhaP (Sodium/prot     |
| FimL | Q9I664 | 0.68551011 | 7.62199122 | Uncharacterized protein                     |
| FimL | Q9HTP5 | 0.68551011 | 7.62199122 | Probable oxidoreductase                     |
| FimL | Q9I5Z1 | 0.68551011 | 7.62199122 | Uncharacterized protein                     |
| FimL | Q9IOJ1 | 0.68551008 | 4.44887063 | NADH-quinone oxidoreductase subunit L       |
| FimL | Q9HWU4 | 0.68551006 | 7.62199122 | Usher CupB3                                 |
| FimL | Q9I6J2 | 0.68027189 | 34.3944763 | Putrescine aminotransferase                 |
| FimL | Q9HYQ5 | 0.67822239 | 17.6257619 | Uncharacterized protein                     |
| FimL | Q9I685 | 0.6435304  | 42.872226  | Adenosylhomocysteinase (EC 3.3.1.1) (S-a    |
| FimL | Q9HTP6 | 0.63799776 | 11.5179444 | Leucine-responsive regulatory protein       |
| FimL | Q9HTZ6 | 0.6319415  | 5.25176631 | 33 kDa chaperonin (Heat shock protein 33    |
| FimL | Q9I3M9 | 0.62284847 | 21.8090552 | Cytochrome c-type biogenesis protein Cyt    |
| FimL | Q9HYW9 | 0.62013063 | 15.3529895 | Probable ATP-dependent DNA helicase         |
| FimL | P57109 | 0.61740338 | 7.19151432 | Maleylacetoacetate isomerase (MAAI) (EC     |
| FimL | Q9HZA3 | 0.60817562 | 6.13981513 | 3-isopropylmalate dehydratase large subu    |
| FimL | P15275 | 0.60333448 | 2.7862587  | Transcriptional regulatory protein AlgQ (A  |
| FimL | Q9HYD8 | 0.60087633 | 14.9007935 | Uncharacterized protein                     |
| FimL | Q9HXQ0 | 0.60024602 | 22.4867927 | Ribosome maturation factor RimM             |
| FimL | Q9I7A7 | 0.59222168 | 47.8929756 | Uncharacterized protein                     |
| FimL | Q9HZI5 | 0.5881415  | 16.9541924 | Uncharacterized protein                     |
| FimL | Q9X6W6 | 0.58445208 | 6.87019445 | Bifunctional protein PyrR [Includes: Pyrim  |
| FimL | Q9I5Q7 | 0.58438929 | 6.43693652 | Uncharacterized protein                     |
| FimL | Q9I333 | 0.57170977 | 3.21729442 | Translocation protein in type III secretion |
| FimL | Q9I6D5 | 0.57145956 | 14.9196097 | Uncharacterized protein                     |
| FimL | Q9I749 | 0.56928382 | 10.4411617 | Uncharacterized protein                     |
| FimL | Q9I4H1 | 0.56865138 | 7.34968415 | Uncharacterized protein                     |
| FimL | Q9HVT2 | 0.56797274 | 4.71811737 | UPF0192 protein PA4489                      |
| FimL | Q9I3N3 | 0.5616216  | 4.65965728 | Cytochrome c-type biogenesis protein Ccr    |
| FimL | Q9HZZ0 | 0.56162113 | 4.44887063 | Uncharacterized protein                     |
| FimL | Q9Z4J7 | 0.55930135 | 11.0326955 | Quinoprotein ethanol dehydrogenase (QE      |
| FimL | Q9IOX8 | 0.55670274 | 4.44887063 | Uncharacterized protein                     |
| FimL | Q9HXR8 | 0.55245923 | 8.63206499 | Probable FMN oxidoreductase                 |
| FimL | Q9HW59 | 0.5495446  | 6.48428048 | Probable amidase                            |
| FimL | Q9I6A8 | 0.54848679 | 6.48428048 | Non-canonical purine NTP pyrophosphata      |
| FimL | Q9HUN4 | 0.54376547 | 3.33621278 | Alanine racemase, biosynthetic (EC 5.1.1.:  |
| FimL | Q9HZW1 | 0.54192676 | 4.44887063 | Expressed protein with apparent function    |
| FimL | Q9HTV8 | 0.53721657 | 19.6323237 | Uncharacterized protein                     |
| FimL | P95435 | 0.52711725 | 3.21729442 | Type III export protein PscG (Pseudomonas   |
| FimL | Q9I5I6 | 0.52241395 | 14.1026213 | NAD-dependent L-serine dehydrogenase        |
| FimL | P28810 | 0.52022716 | 3.56742059 | Methylmalonate-semialdehyde dehydrog        |
| FimL | Q9HXI7 | 0.51923811 | 6.06154651 | IscR                                        |

|      |        |            |            |                                             |
|------|--------|------------|------------|---------------------------------------------|
| FimL | Q9HTL3 | 0.51923742 | 8.20971855 | ATP-dependent DNA helicase RecG             |
| FimL | Q9I2I0 | 0.51760436 | 4.44887063 | Uncharacterized protein                     |
| FimL | P14165 | 0.51584873 | 316.894108 | Citrate synthase (EC 2.3.3.16)              |
| FimL | Q9HUG1 | 0.51413945 | 12.5309384 | Probable glycosyl transferase               |
| FimL | Q9I3F6 | 0.49690644 | 6.06154651 | Aerotaxis receptor Aer                      |
| FimL | Q9HTL1 | 0.49675744 | 17.5985744 | Uncharacterized protein                     |
| FimL | Q9S508 | 0.49636654 | 11.823303  | Phenazine biosynthesis protein PhzB 2       |
| FimL | Q9HXU6 | 0.49463259 | 5.49918365 | Uncharacterized protein                     |
| FimL | Q9HU66 | 0.48768925 | 25.6262276 | tRNA sulfurtransferase (EC 2.8.1.4) (Sulfur |
| FimL | Q9I7A8 | 0.47998433 | 4.44887063 | Peptide deformylase (PDF) (EC 3.5.1.88) (I  |
| FimL | Q9HVF8 | 0.47982819 | 6.48428048 | Probable chemotaxis transducer              |
| FimL | Q9I3B3 | 0.47891536 | 6.29165318 | Probable chemotaxis transducer              |
| FimL | Q9I0Z1 | 0.4702429  | 4.7659337  | Probable oxidoreductase                     |
| FimL | Q9I2U1 | 0.4653168  | 8.03548786 | ATP-dependent Clp protease proteolytic s    |
| FimL | Q9I1J0 | 0.46094529 | 13.3384846 | Uncharacterized protein                     |
| FimL | Q9HUN0 | 0.44533645 | 3.85301658 | 30S ribosomal protein S18                   |
| FimL | Q9HY28 | 0.44421399 | 4.44887063 | Uncharacterized protein                     |
| FimL | Q9HZA4 | 0.44371842 | 10.7560985 | 3-isopropylmalate dehydratase small subu    |
| FimL | Q9HUE2 | 0.44294157 | 11.5312056 | Uncharacterized protein                     |
| FimL | Q9HY41 | 0.44205805 | 6.40641995 | Glycerol kinase 1 (EC 2.7.1.30) (ATP:glycer |
| FimL | Q9HW91 | 0.43903127 | 11.5579561 | Methyl-accepting chemotaxis protein Pctl    |
| FimL | Q9HY01 | 0.43573071 | 3.17782761 | Alcohol dehydrogenase class III             |
| FimL | Q9HVC4 | 0.43435584 | 1.7236536  | 50S ribosomal protein L25 (General stress   |
| FimL | Q9I748 | 0.43224369 | 9.46257249 | Uncharacterized protein                     |
| FimL | Q9I2V5 | 0.42882254 | 6.63834228 | Aconitate hydratase 2 (Aconitase 2) (EC 4.  |
| FimL | Q9HTQ8 | 0.42864618 | 9.65428897 | ATP-dependent DNA helicase Rep              |
| FimL | P15276 | 0.42605265 | 12.2430543 | Transcriptional regulatory protein AlgP (A  |
| FimL | Q9HVD7 | 0.42527367 | 6.48428048 | Ferrochelatase (EC 4.99.1.1) (Heme synth    |
| FimL | Q9HZ78 | 0.42048009 | 22.7063824 | LPS biosynthesis protein WbpG               |
| FimL | Q9HWE7 | 0.41349242 | 0.74369991 | 50S ribosomal protein L5                    |
| FimL | Q9I3D4 | 0.40818913 | 9.80089849 | Succinate dehydrogenase (B subunit)         |
| FimL | O30506 | 0.40450576 | 3.38053329 | Arginine/ornithine transport ATP-binding    |
| FimL | Q9I296 | 0.40308028 | 5.86454236 | Putative isovaleryl-CoA dehydrogenase       |
| FimL | Q9HT20 | 0.39086494 | 1.05613625 | ATP synthase subunit beta (EC 3.6.3.14) (A  |
| FimL | Q9HU65 | 0.38824522 | 4.27581151 | Glutamine synthetase (EC 6.3.1.2) (Glutan   |
| FimL | Q9HWF2 | 0.38613966 | 0.211562   | 30S ribosomal protein S5                    |
| FimL | Q9HWQ0 | 0.38264285 | 9.32416216 | Probable iron-sulfur protein                |
| FimL | Q9HWD6 | 0.38093639 | 1.50296472 | 50S ribosomal protein L4                    |
| FimL | Q9I3D2 | 0.37935624 | 1.17660053 | Dihydrolipoyllysine-residue succinyltransf  |
| FimL | Q9I3Q7 | 0.37853144 | 2.84926507 | Uncharacterized protein                     |
| FimL | Q9HWE5 | 0.37536961 | 0.18616628 | 50S ribosomal protein L14                   |
| FimL | Q9HWF1 | 0.37432045 | 0.10842036 | 50S ribosomal protein L18                   |
| FimL | Q9HW01 | 0.37398932 | 3.80297483 | UDP-N-acetylglucosamine--N-acetylmurar      |
| FimL | Q9HUN2 | 0.37361454 | 2.00035296 | 50S ribosomal protein L9                    |
| FimL | P05384 | 0.37104844 | 3.32260987 | DNA-binding protein HU-beta                 |

|      |        |            |            |                                                |
|------|--------|------------|------------|------------------------------------------------|
| FimL | Q9HWF8 | 0.36975667 | 0.10790845 | 30S ribosomal protein S11                      |
| FimL | Q9I6G0 | 0.36908798 | 6.15699997 | Threonine dehydratase, biosynthetic            |
| FimL | O87131 | 0.3666747  | 3.71682424 | Chemotaxis protein methyltransferase 1 (       |
| FimL | Q9HVV3 | 0.36586312 | 0.10602559 | 30S ribosomal protein S9                       |
| FimL | Q9HWC8 | 0.36559488 | 2.63099471 | 50S ribosomal protein L7/L12                   |
| FimL | Q9HTB7 | 0.36434891 | 4.44887063 | Phosphomannose isomerase/GDP-manno             |
| FimL | Q9HT18 | 0.36402926 | 0.53650021 | ATP synthase subunit alpha (EC 3.6.3.14) (     |
| FimL | Q9HYJ0 | 0.36340371 | 7.56508534 | Probable dihydrolipoamide acetyltransfer       |
| FimL | O54439 | 0.36177292 | 0.31032457 | Acyl carrier protein 1 (ACP 1)                 |
| FimL | Q9I3B4 | 0.3614688  | 6.45460336 | Uncharacterized protein                        |
| FimL | Q9I151 | 0.360222   | 1.95146809 | Uncharacterized protein                        |
| FimL | P30718 | 0.35897945 | 17.9069595 | 60 kDa chaperonin (GroEL protein) (Prote       |
| FimL | Q9I6Z3 | 0.35879581 | 1.19761645 | Alkyl hydroperoxide reductase subunit C        |
| FimL | Q9HUD0 | 0.35781669 | 1.13703043 | 50S ribosomal protein L31                      |
| FimL | Q9I459 | 0.3570434  | 3.21729442 | Probable transcriptional regulator             |
| FimL | Q9HXQ2 | 0.3569025  | 0.18276824 | 50S ribosomal protein L19                      |
| FimL | Q9HWE2 | 0.35522995 | 0.10127771 | 50S ribosomal protein L16                      |
| FimL | Q9HWF0 | 0.3547628  | 1.68760652 | 50S ribosomal protein L6                       |
| FimL | Q9HWD7 | 0.35272243 | 0.09817574 | 50S ribosomal protein L23                      |
| FimL | G3XD23 | 0.35246578 | 2.50753204 | UDP-N-acetyl-2-amino-2-deoxy-D-glucuro         |
| FimL | Q9I187 | 0.35207113 | 6.54184339 | Probable dipeptidase                           |
| FimL | Q9HXI9 | 0.35139788 | 3.44402182 | Probable iron-binding protein IscU             |
| FimL | Q9HXP9 | 0.34984465 | 0.19314174 | 30S ribosomal protein S16                      |
| FimL | Q9I7B5 | 0.34963002 | 5.83734573 | Probable 2-OH-lauroyltransferase               |
| FimL | Q9I0A8 | 0.34962965 | 4.44887063 | Uncharacterized protein                        |
| FimL | Q9HUN6 | 0.3496296  | 4.44887063 | UPF0313 protein PA4928                         |
| FimL | G3XD61 | 0.34951529 | 3.6084844  | UDP-2,3-diacetamido-2,3-dideoxy-D-gluc         |
| FimL | P09591 | 0.34947468 | 1.9152167  | Elongation factor Tu (EF-Tu)                   |
| FimL | Q9HWE0 | 0.34729864 | 0.91874063 | 50S ribosomal protein L22                      |
| FimL | Q9HXI8 | 0.34546844 | 3.74797515 | Cysteine desulfurase IscS (EC 2.8.1.7)         |
| FimL | P53593 | 0.34342918 | 2.01036387 | Succinyl-CoA ligase [ADP-forming] subunit      |
| FimL | G3XDA2 | 0.34187324 | 8.18192513 | 3-oxoacyl-[acyl-carrier-protein] synthase :    |
| FimL | Q9HTT8 | 0.34171628 | 3.76394395 | Uncharacterized protein                        |
| FimL | Q9HVU0 | 0.34126835 | 3.09772749 | Rod shape-determining protein MreB             |
| FimL | Q9HWE9 | 0.33992203 | 1.72151095 | 30S ribosomal protein S8                       |
| FimL | Q9HZ71 | 0.33802133 | 0.98469184 | 30S ribosomal protein S1                       |
| FimL | Q9I3D5 | 0.33751628 | 3.27440379 | Succinate dehydrogenase (A subunit)            |
| FimL | Q9HVV2 | 0.33585906 | 1.04194116 | 50S ribosomal protein L13                      |
| FimL | O82850 | 0.33469398 | 1.55202969 | 30S ribosomal protein S2                       |
| FimL | Q9HWE3 | 0.33443924 | 0.69673476 | 50S ribosomal protein L29                      |
| FimL | Q9I2X0 | 0.33438371 | 2.7862587  | Putative phosphoenolpyruvate synthase r        |
| FimL | P23747 | 0.33425351 | 2.62430823 | Alginate biosynthesis transcriptional regu     |
| FimL | Q9I0K4 | 0.33326765 | 3.07994213 | Isocitrate lyase (ICL) (Isocitrase) (Isocitrat |
| FimL | Q9HUG0 | 0.33145455 | 7.2130882  | Probable carbamoyl transferase                 |
| FimL | Q9HU14 | 0.33134509 | 4.5269965  | 3,5-bisphosphate nucleotidase CysQ             |

|      |        |            |            |                                              |
|------|--------|------------|------------|----------------------------------------------|
| FimL | Q9HVW7 | 0.33128605 | 2.42170379 | UDP-N-acetylglucosamine 1-carboxyvinylt      |
| FimL | Q9HWD1 | 0.33041366 | 0.32471869 | 30S ribosomal protein S7                     |
| FimL | Q9I1H0 | 0.33008779 | 4.44887063 | AmbB                                         |
| FimL | Q9HY81 | 0.32964984 | 0.91249511 | Probable peroxidase                          |
| FimL | P08280 | 0.32677601 | 5.22383502 | Protein RecA (Recombinase A)                 |
| FimL | Q9HV43 | 0.32665792 | 14.389274  | Chaperone protein DnaK (HSP70) (Heat sh      |
| FimL | Q9HWC7 | 0.32552747 | 1.24578325 | 50S ribosomal protein L10                    |
| FimL | Q51567 | 0.32441702 | 2.05223646 | Succinyl-CoA ligase [ADP-forming] subunit    |
| FimL | Q9I2A8 | 0.32331885 | 2.2690255  | Acetyl-CoA acetyltransferase (EC 2.3.1.9)    |
| FimL | Q9HWE1 | 0.3231744  | 0.07566571 | 30S ribosomal protein S3                     |
| FimL | Q9I533 | 0.32292375 | 3.56514863 | Uncharacterized protein                      |
| FimL | Q9HWD4 | 0.32230912 | 0.1346129  | 30S ribosomal protein S10                    |
| FimL | Q9HXR3 | 0.32149013 | 11.428088  | Uncharacterized protein                      |
| FimL | P38107 | 0.3173784  | 5.84629501 | Sigma factor AlgU negative regulatory pro    |
| FimL | Q9HYT5 | 0.31614586 | 2.8068809  | Universal stress protein                     |
| FimL | Q9I6H5 | 0.31444062 | 2.9675986  | D-3-phosphoglycerate dehydrogenase           |
| FimL | Q9HX51 | 0.31407215 | 4.27696877 | Probable transcriptional regulator           |
| FimL | Q9HWD5 | 0.31309076 | 0.33206522 | 50S ribosomal protein L3                     |
| FimL | Q51561 | 0.31300313 | 7.47753614 | DNA-directed RNA polymerase subunit be       |
| FimL | Q9HUK1 | 0.31046421 | 2.74073238 | DNA topoisomerase 4 subunit A (EC 5.99.      |
| FimL | Q9HVM1 | 0.31034576 | 0.23785248 | 30S ribosomal protein S20                    |
| FimL | Q9HZG8 | 0.31033738 | 3.35388556 | Uncharacterized protein                      |
| FimL | G3XCW5 | 0.31016304 | 0.76647444 | Uncharacterized protein                      |
| FimL | Q9I702 | 0.30942674 | 3.3786848  | Putative 3-oxopropanoate dehydrogenase       |
| FimL | Q9HXZ5 | 0.30830456 | 7.15477575 | Enolase (EC 4.2.1.11) (2-phospho-D-glycer    |
| FimL | Q05097 | 0.30813705 | 8.46303773 | PA-I galactophilic lectin (PA-IL) (Galactose |
| FimL | Q9HZN4 | 0.30772839 | 0.50836081 | 50S ribosomal protein L32                    |
| FimL | Q9I3D3 | 0.30626005 | 4.33114597 | 2-oxoglutarate dehydrogenase (E1 subuni      |
| FimL | Q9I1M2 | 0.30510228 | 14.4826975 | 2-oxoisovalerate dehydrogenase subunit       |
| FimL | Q9HUM9 | 0.30454884 | 7.62357037 | 30S ribosomal protein S6                     |
| FimL | Q9HWC5 | 0.30364066 | 1.89870359 | 50S ribosomal protein L11                    |
| FimL | Q9HWC9 | 0.30314126 | 2.93862872 | DNA-directed RNA polymerase subunit be       |
| FimL | Q9HVF0 | 0.30264749 | 6.54484575 | Uncharacterized protein                      |
| FimL | Q9HWC6 | 0.30249642 | 4.62900049 | 50S ribosomal protein L1                     |
| FimL | Q9HVL6 | 0.30212586 | 1.20941961 | 50S ribosomal protein L21                    |
| FimL | P04739 | 0.30139036 | 1.3881408  | Fimbrial protein (Pilin) (Strain PAO)        |
| FimL | Q9I3G6 | 0.30062912 | 4.7287905  | Probable ferredoxin                          |
| FimL | Q9HUC3 | 0.29912322 | 0.33693193 | Polyhydroxyalkanoate synthesis protein P     |
| FimL | Q9I576 | 0.29908786 | 3.63621092 | 4-hydroxyphenylpyruvate dioxygenase (4l      |
| FimL | O52759 | 0.29726512 | 0.2414421  | 30S ribosomal protein S4                     |
| FimL | Q9HYZ5 | 0.29707703 | 8.90296089 | Cell division topological specificity factor |
| FimL | Q9I317 | 0.29683411 | 2.09560262 | Type III export protein PscE (Pseudomona     |
| FimL | Q9HT19 | 0.29676276 | 1.58011474 | ATP synthase gamma chain (ATP synthase       |
| FimL | Q9IOL1 | 0.29613742 | 6.34483874 | High frequency lysogenization protein Hfl    |
| FimL | O52760 | 0.29570594 | 20.6432679 | DNA-directed RNA polymerase subunit alj      |

|      |        |            |            |                                                    |
|------|--------|------------|------------|----------------------------------------------------|
| FimL | Q9HWF4 | 0.29488864 | 0.05348506 | 50S ribosomal protein L15                          |
| FimL | Q9HVF2 | 0.29452923 | 3.39639493 | Uncharacterized protein                            |
| FimL | Q9HTT7 | 0.29195591 | 8.03723076 | Uncharacterized protein                            |
| FimL | G3XD46 | 0.29159368 | 4.14085538 | Penicillin-binding protein 3                       |
| FimL | Q9I522 | 0.28993444 | 4.71811737 | Lipopolysaccharide biosynthetic protein L          |
| FimL | Q9HU56 | 0.28963139 | 1.59709622 | Protein-export protein SecB                        |
| FimL | Q9I0J9 | 0.28755286 | 3.53373783 | NADH-quinone oxidoreductase subunit C <sub>1</sub> |
| FimL | Q9I099 | 0.28747671 | 4.16100343 | Threonine--tRNA ligase (EC 6.1.1.3) (Thre          |
| FimL | Q9HWD8 | 0.28729441 | 9.59868804 | 50S ribosomal protein L2                           |
| FimL | Q9I137 | 0.28624672 | 5.85270293 | Glycine dehydrogenase (decarboxylating)            |
| FimL | O69754 | 0.285306   | 4.18859689 | Trans-2,3-dihydro-3-hydroxyanthranilate            |
| FimL | Q03456 | 0.28421009 | 1.91290572 | Ferric uptake regulation protein (Ferric up        |
| FimL | Q9HTN8 | 0.2836228  | 12.3460822 | 50S ribosomal protein L28                          |
| FimL | Q9I0D5 | 0.28269051 | 3.54900944 | Uncharacterized protein                            |
| FimL | Q9I2T8 | 0.28259619 | 10.0230746 | Peptidyl-prolyl cis-trans isomerase D              |
| FimL | Q9I5U9 | 0.28091653 | 3.46223808 | Uncharacterized protein                            |
| FimL | Q9HT25 | 0.2803925  | 3.59614425 | Glutamine--fructose-6-phosphate aminot             |
| FimL | Q9HWD2 | 0.28031919 | 2.69540605 | Elongation factor G 1 (EF-G 1)                     |
| FimL | P13794 | 0.2781038  | 0.96958006 | Outer membrane porin F                             |
| FimL | G3XD01 | 0.27715806 | 2.8115848  | UDP-2-acetamido-3-amino-2,3-dideoxy-D              |
| FimL | Q9HWE4 | 0.27642404 | 0.51483988 | 30S ribosomal protein S17                          |
| FimL | Q9I055 | 0.27602306 | 3.05783006 | Probable chemotaxis transducer                     |
| FimL | Q9I6U5 | 0.27591523 | 4.73988322 | Probable porin                                     |
| FimL | Q51422 | 0.27546567 | 2.41496951 | Aspartate--tRNA ligase (EC 6.1.1.12) (Aspa         |
| FimL | Q9I0A2 | 0.27220142 | 0.36712584 | 50S ribosomal protein L20                          |
| FimL | Q9HXJ8 | 0.27189135 | 2.24445103 | GTPase Der (GTP-binding protein EngA)              |
| FimL | P13981 | 0.27166401 | 2.67907004 | Arginine deiminase (ADI) (EC 3.5.3.6) (Arg         |
| FimL | Q9I5H0 | 0.27163772 | 4.91091249 | Uncharacterized protein                            |
| FimL | Q9HY77 | 0.27100774 | 0.98159512 | Glutaredoxin                                       |
| FimL | Q9HZ76 | 0.2699583  | 3.1579761  | UDP-2-acetamido-2-deoxy-3-oxo-D-glucur             |
| FimL | Q59637 | 0.26966934 | 1.90145543 | Pyruvate dehydrogenase E1 component (l             |
| FimL | Q9I4I2 | 0.26955898 | 1.97422021 | Ribonucleoside-diphosphate reductase su            |
| FimL | Q9XCL6 | 0.269271   | 5.05879982 | Glutamate--tRNA ligase (EC 6.1.1.17) (Glu          |
| FimL | Q9I690 | 0.26800174 | 1.67423436 | UPF0312 protein PA0423                             |
| FimL | Q9HT16 | 0.26760616 | 1.66536652 | ATP synthase subunit b (ATP synthase F(0           |
| FimL | Q9HT17 | 0.26588117 | 2.02560017 | ATP synthase subunit delta (ATP synthase           |
| FimL | Q9I1M1 | 0.26547389 | 8.79806483 | 2-oxoisovalerate dehydrogenase subunit l           |
| FimL | Q9I0Q5 | 0.26354403 | 7.84098794 | Uncharacterized protein                            |
| FimL | Q9I0X0 | 0.26326467 | 4.7949866  | Anthranilate dioxygenase large subunit             |
| FimL | Q9HTV1 | 0.26284997 | 5.26214746 | Transcription termination factor Rho (EC :         |
| FimL | Q9I327 | 0.26264755 | 4.75815514 | Type III secretory apparatus protein PcrD          |
| FimL | Q9HTR3 | 0.26215306 | 19.6278859 | Probable choline transporter                       |
| FimL | Q9HWE6 | 0.26160145 | 2.80339419 | 50S ribosomal protein L24                          |
| FimL | Q9I1H3 | 0.26074876 | 7.13884206 | AmbE                                               |
| FimL | G3XCV0 | 0.25942202 | 3.24775766 | Transcriptional regulator FleQ                     |

|      |        |            |            |                                                                   |
|------|--------|------------|------------|-------------------------------------------------------------------|
| FimL | O52761 | 0.25885388 | 2.09497956 | 50S ribosomal protein L17                                         |
| FimL | Q9HV50 | 0.25493539 | 7.92796377 | Phosphoglucosamine mutase (EC 5.4.2.10)                           |
| FimL | Q9I0A0 | 0.25371317 | 1.74604675 | Translation initiation factor IF-3                                |
| FimL | Q9HZ66 | 0.25141974 | 2.93829373 | Phosphoserine aminotransferase (EC 2.6.1.1)                       |
| FimL | Q9HW86 | 0.25084705 | 3.92372263 | MvaT (Transcriptional regulator MvaT, P1)                         |
| FimL | Q9HWE8 | 0.24974391 | 1.30817772 | 30S ribosomal protein S14                                         |
| FimL | Q9HX60 | 0.24969751 | 0.99047923 | Uncharacterized protein                                           |
| FimL | Q9HTL0 | 0.24832472 | 2.52668519 | DNA-binding protein HU-alpha                                      |
| FimL | Q9HVL5 | 0.2482867  | 1.95318849 | Octaprenyl-diphosphate synthase                                   |
| FimL | Q9I0I4 | 0.24810964 | 4.5850787  | Probable chemotaxis transducer                                    |
| FimL | Q9HWD0 | 0.24787982 | 1.13759048 | 30S ribosomal protein S12                                         |
| FimL | Q9HXI0 | 0.24766857 | 1.04285035 | Uncharacterized protein                                           |
| FimL | Q9HWF3 | 0.24743363 | 0.20458743 | 50S ribosomal protein L30                                         |
| FimL | Q9HVJ1 | 0.24695312 | 1.34354151 | Probable ATP-binding component of ABC                             |
| FimL | Q9I0L5 | 0.24615643 | 4.72465924 | Isocitrate dehydrogenase [NADP] (EC 1.1.1.41)                     |
| FimL | Q9I1F0 | 0.24428711 | 9.39818562 | Uncharacterized protein                                           |
| FimL | Q9HTY9 | 0.24257398 | 3.50279261 | AmgR                                                              |
| FimL | Q9HWF7 | 0.24229675 | 0.53805184 | 30S ribosomal protein S13                                         |
| FimL | Q9I7A9 | 0.24204499 | 3.9782938  | Ribosomal RNA small subunit methyltransferase H                   |
| FimL | P47203 | 0.2416793  | 4.70036311 | Cell division protein FtsA                                        |
| FimL | Q9HY05 | 0.24076126 | 4.44887063 | 5'-nucleotidase SurE (EC 3.1.3.5) (Nucleoside diphosphate kinase) |
| FimL | Q9I5E3 | 0.23973382 | 3.17510422 | Citrate synthase                                                  |
| FimL | Q9I321 | 0.23902071 | 2.18583266 | ExsD                                                              |
| FimL | G3XCU6 | 0.23859401 | 1.66152883 | Transcriptional regulator CysB                                    |
| FimL | Q9HVG5 | 0.23766921 | 4.65965728 | Glycerate dehydrogenase                                           |
| FimL | Q9I584 | 0.23629089 | 4.44887063 | Morphogene protein BolA                                           |
| FimL | Q9HZI3 | 0.23494609 | 2.1211116  | Probable lipid kinase YegS-like (EC 2.7.1.-)                      |
| FimL | Q9I525 | 0.23470744 | 5.82302319 | 23S rRNA (uracil(1939)-C(5))-methyltransferase                    |
| FimL | Q9I1Z6 | 0.2343591  | 10.5916766 | Alcohol dehydrogenase (Zn-dependent)                              |
| FimL | Q9HZ98 | 0.23385218 | 4.69911319 | Heat-shock protein lbpA                                           |
| FimL | Q9HW68 | 0.23379089 | 5.45465918 | Probable fumarase                                                 |
| FimL | P49988 | 0.23236246 | 1.92091446 | RNA polymerase sigma-54 factor                                    |
| FimL | Q9I0J7 | 0.2318926  | 3.70217425 | NADH-quinone oxidoreductase subunit F                             |
| FimL | Q9HZM4 | 0.23177377 | 4.81203757 | UPF0434 protein PA2980                                            |
| FimL | Q9I4Z7 | 0.23039113 | 2.69343091 | Probable dna-binding stress protein                               |
| FimL | Q9I0H1 | 0.22894308 | 1.94362986 | Uncharacterized protein                                           |
| FimL | Q9I747 | 0.22857578 | 3.09922405 | Protein hcp1                                                      |
| FimL | Q9HZR0 | 0.22788289 | 2.53711185 | Uncharacterized protein                                           |
| FimL | Q9I513 | 0.22782822 | 3.89819909 | Phosphoribosylformylglycinamide cyclase                           |
| FimL | Q9HXJ6 | 0.226839   | 7.71553009 | Uncharacterized protein                                           |
| FimL | Q9I2U0 | 0.22662654 | 3.96418562 | ATP-dependent Clp protease ATP-binding subunit ClpA               |
| FimL | Q9I4X1 | 0.22646282 | 3.11166489 | PqsC                                                              |
| FimL | Q9I4Z4 | 0.22567962 | 0.23305362 | Peptidoglycan-associated lipoprotein                              |
| FimL | Q9HXR7 | 0.22533645 | 10.7742337 | Single-stranded-DNA-specific exonuclease                          |
| FimL | Q9HUM6 | 0.22504716 | 2.0936634  | Adenylosuccinate synthetase (AMPSase) (EC 6.1.1.1)                |

|      |        |            |            |                                                      |
|------|--------|------------|------------|------------------------------------------------------|
| FimL | Q9HUQ0 | 0.22475577 | 2.62819163 | Probable binding protein component of A              |
| FimL | Q9HXJ0 | 0.22378875 | 1.55877247 | Probable iron-binding protein IscA                   |
| FimL | Q9I0W9 | 0.22293202 | 3.11180773 | Anthranilate dioxygenase small subunit               |
| FimL | Q9I3B2 | 0.22266142 | 2.87830703 | Beta-ketoacyl-ACP synthase I                         |
| FimL | Q9I5H5 | 0.22251045 | 2.88609655 | Uncharacterized protein                              |
| FimL | Q9I4F9 | 0.2224883  | 5.15574925 | Two-component response regulator PhoP                |
| FimL | Q9I1N7 | 0.22241806 | 3.50255642 | PslB                                                 |
| FimL | P37798 | 0.22236129 | 2.4040017  | Biotin carboxylase (EC 6.3.4.14) (Acetyl-CoA)        |
| FimL | P43335 | 0.22078165 | 3.03611806 | Pterin-4-alpha-carbinolamine dehydratase             |
| FimL | O52762 | 0.22073365 | 1.63801041 | Catalase (EC 1.11.1.6)                               |
| FimL | Q9HYG6 | 0.22037157 | 3.26440046 | Uncharacterized protein                              |
| FimL | Q9HV42 | 0.22000754 | 4.26013225 | Protein GrpE (HSP-70 cofactor)                       |
| FimL | P11221 | 0.21951184 | 0.38660128 | Major outer membrane lipoprotein (Outer membrane)    |
| FimL | P38100 | 0.21910758 | 3.55714096 | Carbamoyl-phosphate synthase large chain             |
| FimL | Q9HV61 | 0.21736052 | 1.02989418 | UPF0337 protein PA4738                               |
| FimL | Q9I589 | 0.21649082 | 12.0124916 | Chitin-binding protein CbpD                          |
| FimL | Q9HTU9 | 0.21552826 | 2.84013319 | Uncharacterized protein                              |
| FimL | Q9I4W5 | 0.21368345 | 0.68582519 | Bacterioferritin comigratory protein                 |
| FimL | P26276 | 0.21268658 | 3.88992309 | Phosphomannomutase/phosphoglucosyltransferase        |
| FimL | P55222 | 0.21139415 | 1.49595422 | Cyclic AMP receptor-like protein                     |
| FimL | Q9I169 | 0.21088343 | 3.49963551 | Uncharacterized protein                              |
| FimL | Q9I1M0 | 0.2104581  | 12.3592271 | Lipoamide acyltransferase component of               |
| FimL | Q9HV59 | 0.20922914 | 3.01842163 | Polyribonucleotide nucleotidyltransferase            |
| FimL | P47205 | 0.20822065 | 2.91159244 | UDP-3-O-[3-hydroxymyristoyl] N-acetylglucosamine     |
| FimL | Q9I6M1 | 0.20668586 | 8.6863416  | Uncharacterized protein                              |
| FimL | Q9HZ67 | 0.20534617 | 2.09560262 | P-protein [Includes: Chorismate mutase (EC 2.3.1.6)] |
| FimL | Q9I521 | 0.20504724 | 1.85155409 | Uncharacterized protein                              |
| FimL | Q9HTL9 | 0.20352039 | 4.57359008 | Uncharacterized protein                              |
| FimL | Q9I2A2 | 0.20282893 | 2.86514237 | Fumarylacetoacetase                                  |
| FimL | P48372 | 0.20079761 | 3.50181027 | DNA gyrase subunit A (EC 5.99.1.3)                   |
| FimL | Q9HYQ1 | 0.20032678 | 3.28931427 | ATP-dependent DNA helicase RecQ                      |
| FimL | Q9HVC5 | 0.19841682 | 5.70793511 | Ribose-phosphate pyrophosphokinase (RPPK)            |
| FimL | Q9I188 | 0.1978266  | 3.13944384 | PvdP                                                 |
| FimL | Q9HTL4 | 0.19778295 | 1.78187231 | OxyR                                                 |
| FimL | Q9HVA2 | 0.19687729 | 3.45017322 | Ketol-acid reductoisomerase (EC 1.1.1.86)            |
| FimL | P30720 | 0.19564764 | 1.34825651 | 10 kDa chaperonin (GroES protein) (Protein GroE)     |
| FimL | Q9I544 | 0.19506915 | 2.18583266 | Probable Mg transporter MgtE                         |
| FimL | Q9I6C2 | 0.19237389 | 4.82036185 | Probable zinc protease                               |
| FimL | Q9I1S5 | 0.19232596 | 5.29380691 | Uncharacterized protein                              |
| FimL | Q9I5Z0 | 0.19145233 | 1.76639188 | S-adenosylmethionine synthase (AdoMet synthetase)    |
| FimL | Q9HZP6 | 0.19078185 | 1.44620847 | Electron transfer flavoprotein subunit beta          |
| FimL | G3XD94 | 0.18953792 | 3.58197769 | UDP-N-acetyl-D-glucosamine 6-dehydrogenase           |
| FimL | G3XD85 | 0.1877923  | 4.66749733 | Probable glycosyltransferase WbpH                    |
| FimL | Q9I1E7 | 0.18770187 | 3.77492888 | Uncharacterized protein                              |
| FimL | Q9HUG4 | 0.18754115 | 4.65965728 | Uncharacterized protein                              |

|      |        |            |            |                                               |
|------|--------|------------|------------|-----------------------------------------------|
| FimL | Q9X4G0 | 0.18730764 | 2.17793859 | Homogentisate 1,2-dioxygenase (HGDO) (        |
| FimL | Q9I0J8 | 0.18676579 | 3.70176183 | NADH-quinone oxidoreductase subunit E         |
| FimL | Q9I553 | 0.18594153 | 4.36440314 | Alanine--tRNA ligase (EC 6.1.1.7) (Alanyl-t   |
| FimL | P47204 | 0.18571077 | 2.66036074 | Cell division protein FtsZ                    |
| FimL | Q51547 | 0.18543342 | 4.65179285 | Phosphate-specific transport system acce      |
| FimL | Q9I762 | 0.18497114 | 3.15167136 | Uncharacterized protein                       |
| FimL | Q9HYR9 | 0.18308218 | 1.71776179 | ATP-dependent Clp protease proteolytic s      |
| FimL | Q9I0D7 | 0.18280319 | 2.63964371 | Uncharacterized protein                       |
| FimL | Q9I3C5 | 0.18246315 | 2.36446878 | Chaperone protein HtpG (Heat shock prot       |
| FimL | Q9HWD9 | 0.18234008 | 0.46954187 | 30S ribosomal protein S19                     |
| FimL | Q9HW32 | 0.18211691 | 1.82661083 | Insulin-cleaving metalloproteinase outer r    |
| FimL | Q9I383 | 0.18130554 | 3.11995688 | Selenide, water dikinase (EC 2.7.9.3) (Sele   |
| FimL | Q9HXF7 | 0.18111669 | 3.38721783 | Nucleoid-associated protein PA3849            |
| FimL | O50274 | 0.18105381 | 4.34436403 | Bifunctional enzyme CysN/CysC [Includes:      |
| FimL | Q9HYU4 | 0.18083844 | 2.31794772 | Long-chain-fatty-acid--CoA ligase             |
| FimL | Q9HVV6 | 0.18060391 | 2.52387649 | Probable ATP-binding component of ABC         |
| FimL | Q51375 | 0.17905271 | 3.91780681 | 3-isopropylmalate dehydrogenase (EC 1.1       |
| FimL | P48247 | 0.17890133 | 1.77430115 | Glutamate-1-semialdehyde 2,1-aminomu          |
| FimL | Q9I2R2 | 0.17878765 | 2.60075109 | Probable oxidoreductase                       |
| FimL | Q9I299 | 0.17844745 | 3.74252712 | Methylcrotonyl-CoA carboxylase, alpha-su      |
| FimL | Q9I6J5 | 0.17834869 | 2.81056741 | Probable glutamine synthetase                 |
| FimL | Q9HVV9 | 0.17724279 | 2.53711185 | Uncharacterized protein                       |
| FimL | Q9HWQ2 | 0.17480763 | 4.7703747  | Uncharacterized protein                       |
| FimL | Q9HYN9 | 0.1735885  | 2.18583266 | Probable D-serine dehydratase (EC 4.3.1.1     |
| FimL | Q9I2Z1 | 0.1734192  | 4.38106754 | Uncharacterized protein                       |
| FimL | Q9I291 | 0.17296267 | 2.8100581  | UTP--glucose-1-phosphate uridylyltransfe      |
| FimL | P72151 | 0.17229394 | 1.30468175 | B-type flagellin                              |
| FimL | Q9HXP8 | 0.17128921 | 2.6759026  | Signal recognition particle protein (Fifty-fr |
| FimL | Q9HYU8 | 0.17080734 | 3.58722806 | Probable HIT family protein                   |
| FimL | Q9I2R3 | 0.17001207 | 3.06366716 | Probable protease                             |
| FimL | Q9I4F5 | 0.16997341 | 4.82594163 | C4-dicarboxylate transport protein 2          |
| FimL | Q9HZM8 | 0.16988334 | 2.21101064 | Ribonuclease E (RNase E) (EC 3.1.26.12)       |
| FimL | Q9I088 | 0.16970427 | 2.24484422 | Ecotin                                        |
| FimL | Q9HUG7 | 0.16960829 | 5.2913206  | Uncharacterized protein                       |
| FimL | P26480 | 0.16905773 | 5.35731699 | RNA polymerase sigma factor RpoD (Sigm        |
| FimL | G3XD14 | 0.16807395 | 2.70070504 | RNA polymerase-binding transcription fac      |
| FimL | Q9HV73 | 0.16724506 | 4.96761678 | Two-component response regulator CbrB         |
| FimL | Q9I6S0 | 0.16691349 | 2.81307853 | Probable transcriptional regulator            |
| FimL | Q9HXJ4 | 0.16662167 | 2.66703779 | 4-hydroxy-3-methylbut-2-en-1-yl diphosp       |
| FimL | Q9HWH5 | 0.16632823 | 3.6655083  | Probable Resistance-Nodulation-Cell Divis     |
| FimL | Q9HXI1 | 0.16591767 | 2.32956203 | Protein translocase subunit SecD              |
| FimL | Q9HYT6 | 0.165394   | 11.0129474 | RNA polymerase-associated protein RapA        |
| FimL | Q9HTF1 | 0.16451288 | 2.81194652 | Low specificity L-threonine aldolase (Low     |
| FimL | Q9HTD9 | 0.16450448 | 4.29060739 | Alcohol dehydrogenase                         |
| FimL | P38098 | 0.16358577 | 6.16318701 | Carbamoyl-phosphate synthase small cha        |

|      |        |            |            |                                             |
|------|--------|------------|------------|---------------------------------------------|
| FimL | Q9I2U2 | 0.16128004 | 1.91527307 | Trigger factor (TF) (EC 5.2.1.8) (PPase)    |
| FimL | Q9HYI9 | 0.16046396 | 3.00843737 | Probable pyruvate dehydrogenase E1 con      |
| FimL | O68282 | 0.15847269 | 4.31738984 | Glucose-6-phosphate 1-dehydrogenase (C      |
| FimL | G3XD28 | 0.15843894 | 3.50509035 | Type 4 fimbrial biogenesis protein PilM     |
| FimL | Q9HW15 | 0.15826994 | 2.5868138  | Probable short-chain dehydrogenase          |
| FimL | Q9I3D1 | 0.15793596 | 1.930588   | Dihydrolipoyl dehydrogenase (EC 1.8.1.4)    |
| FimL | Q9HVV5 | 0.15682817 | 2.56855665 | Uncharacterized protein                     |
| FimL | Q9HTQ9 | 0.15608546 | 4.01006354 | Uncharacterized protein                     |
| FimL | Q9HW17 | 0.15468635 | 1.66841393 | Uncharacterized protein                     |
| FimL | Q9I5V8 | 0.15436123 | 1.04404026 | 30S ribosomal protein S21                   |
| FimL | Q9HXZ4 | 0.15431955 | 3.07790446 | CTP synthase (EC 6.3.4.2) (CTP synthetase   |
| FimL | O82851 | 0.1534447  | 2.19097351 | Elongation factor Ts (EF-Ts)                |
| FimL | P27726 | 0.15276922 | 7.1890011  | Glyceraldehyde-3-phosphate dehydrogen       |
| FimL | Q9HVL2 | 0.15159325 | 3.11813847 | Peptidyl-prolyl cis-trans isomerase (EC 5.2 |
| FimL | O50273 | 0.14970607 | 1.5612985  | Sulfate adenylyltransferase subunit 2 (EC   |
| FimL | Q9I4W3 | 0.14919847 | 5.34832678 | 4-hydroxy-tetrahydrodipicolinate synthas    |
| FimL | Q9HT21 | 0.14885199 | 1.57830091 | ATP synthase epsilon chain (ATP synthase    |
| FimL | Q9I2P8 | 0.14857648 | 0.64270753 | Fe/S biogenesis protein NfuA                |
| FimL | Q9HWG9 | 0.14856967 | 2.51766894 | Flavin-containing monooxygenase             |
| FimL | Q9HWZ6 | 0.14784144 | 2.92312211 | Inorganic pyrophosphatase (EC 3.6.1.1) (P   |
| FimL | Q9I4W4 | 0.14602354 | 3.33621278 | Uncharacterized protein                     |
| FimL | Q9I020 | 0.14432107 | 2.65173397 | Uncharacterized protein                     |
| FimL | Q9HYQ4 | 0.1429716  | 2.63964371 | Probable transcriptional regulator          |
| FimL | Q9HUJ8 | 0.1428511  | 5.5094823  | DNA topoisomerase 4 subunit B (EC 5.99.:    |
| FimL | Q9HZK4 | 0.1422778  | 2.79393091 | Probable glyceraldehyde-3-phosphate del     |
| FimL | Q9I687 | 0.14102846 | 2.95409135 | Methylenetetrahydrofolate reductase (EC     |
| FimL | Q9I7B8 | 0.14078481 | 2.45877713 | Glycine--tRNA ligase beta subunit (EC 6.1.  |
| FimL | Q14T74 | 0.13908523 | 3.21729442 | NAD(P) transhydrogenase subunit alpha (     |
| FimL | P57668 | 0.13878494 | 1.93252883 | Probable thiol peroxidase (EC 1.11.1.-)     |
| FimL | Q9HVB0 | 0.13833444 | 4.98405083 | Uncharacterized protein                     |
| FimL | Q9HVJ7 | 0.13819745 | 2.29738691 | Glutamate dehydrogenase                     |
| FimL | Q9HTE3 | 0.13809528 | 2.46035249 | Glutathione-independent formaldehyde c      |
| FimL | Q9HUB1 | 0.13783198 | 2.53711185 | Probable chemotaxis transducer              |
| FimL | Q9I0J6 | 0.1364821  | 2.4865581  | NADH-quinone oxidoreductase subunit G       |
| FimL | P77915 | 0.13602178 | 7.07794023 | Oxygen-independent coproporphyrinoger       |
| FimL | P38103 | 0.13472429 | 1.68762436 | 4-hydroxy-tetrahydrodipicolinate reducta    |
| FimL | Q9I7C4 | 0.13416406 | 1.81692541 | DNA polymerase III subunit beta (EC 2.7.7   |
| FimL | Q9HVV9 | 0.13378001 | 2.60997834 | Histidinol dehydrogenase (HDH) (EC 1.1.1    |
| FimL | Q9HWQ1 | 0.13336433 | 5.32190187 | Probable sulfite or nitrite reductase       |
| FimL | Q9HUG9 | 0.13174098 | 3.52944889 | Bifunctional protein HldE [Includes: D-bet  |
| FimL | Q9HYP7 | 0.13144799 | 2.26541109 | Probable chemotaxis protein                 |
| FimL | Q9HYI8 | 0.13085443 | 3.80458795 | Probable pyruvate dehydrogenase E1 con      |
| FimL | Q9HYX7 | 0.12885584 | 6.84878483 | Recombination-associated protein RdgC       |
| FimL | Q9I4P3 | 0.12844433 | 4.73988322 | Flagellar hook-associated protein 1 FlgK    |
| FimL | Q9I6E0 | 0.12724012 | 9.44897086 | Dihydroxy-acid dehydratase (DAD) (EC 4.2    |

|      |        |            |            |                                               |
|------|--------|------------|------------|-----------------------------------------------|
| FimL | Q9I7C2 | 0.1268015  | 3.09176652 | DNA gyrase subunit B (EC 5.99.1.3)            |
| FimL | Q9I060 | 0.12653684 | 2.66525564 | Uncharacterized protein                       |
| FimL | P40947 | 0.12652766 | 1.2070475  | Single-stranded DNA-binding protein (SSB)     |
| FimL | Q9HV66 | 0.12625577 | 1.63090395 | Acetyl-coenzyme A synthetase 2 (AcCoA s       |
| FimL | Q9HYQ8 | 0.12608404 | 4.63256715 | ADP-L-glycero-D-manno-heptose-6-epime         |
| FimL | Q9HYG2 | 0.12464474 | 5.33204598 | Alkanesulfonate monooxygenase (EC 1.14        |
| FimL | Q9HV54 | 0.12450204 | 1.883549   | N utilization substance protein A             |
| FimL | Q9HV44 | 0.12447365 | 2.45931459 | Chaperone protein DnaJ                        |
| FimL | Q9I347 | 0.12435406 | 2.22033831 | 50S ribosomal protein L3 glutamine meth       |
| FimL | P46384 | 0.12328155 | 5.25482741 | Protein PilG                                  |
| FimL | Q9I2U9 | 0.12147025 | 1.91985162 | Peptidyl-prolyl cis-trans isomerase (EC 5.2   |
| FimL | Q9HZ15 | 0.11983899 | 1.80181228 | Probable transcriptional regulator            |
| FimL | P52002 | 0.11832952 | 3.32712143 | Multidrug resistance protein MexB (Multi      |
| FimL | Q9I6H4 | 0.1182427  | 1.92435252 | Uncharacterized protein                       |
| FimL | P21175 | 0.11745292 | 2.54441107 | Leucine-, isoleucine-, valine-, threonine-, ; |
| FimL | Q9HYR5 | 0.11727643 | 2.48270552 | Probable short chain dehydrogenase            |
| FimL | Q9HXK5 | 0.11676009 | 3.23253745 | 2-isopropylmalate synthase (EC 2.3.3.13)      |
| FimL | Q9HV48 | 0.11673795 | 3.48053639 | ATP-dependent zinc metalloprotease FtsH       |
| FimL | Q9HZE0 | 0.11646703 | 9.11682655 | NAD-specific glutamate dehydrogenase (N       |
| FimL | Q9HXU8 | 0.11644578 | 0.90837003 | Lipotoxon F, LptF                             |
| FimL | O69753 | 0.11585261 | 3.36045752 | Phenazine biosynthesis protein PhzB 1         |
| FimL | Q9HZP7 | 0.11578172 | 2.43610562 | Electron transfer flavoprotein subunit alpi   |
| FimL | P57112 | 0.114604   | 1.69995586 | Soluble pyridine nucleotide transhydrogei     |
| FimL | Q9HUE1 | 0.11436649 | 2.15326289 | Uncharacterized protein                       |
| FimL | Q9I2W9 | 0.11399972 | 1.6022752  | Phosphoenolpyruvate synthase (PEP syntl       |
| FimL | Q9I5G8 | 0.11333107 | 5.59591365 | Elongation factor 4 (EF-4) (EC 3.6.5.n1) (Ri  |
| FimL | Q9I4H8 | 0.11252413 | 1.5008703  | Probable cold-shock protein                   |
| FimL | Q9I367 | 0.11232713 | 3.32349329 | Uncharacterized protein                       |
| FimL | Q9X2T1 | 0.11122872 | 1.12877944 | Thioredoxin (Trx)                             |
| FimL | Q9HV60 | 0.11118203 | 2.0230784  | Uncharacterized protein                       |
| FimL | Q9I7C5 | 0.11091268 | 1.85386718 | Chromosomal replication initiator protein     |
| FimL | G3XDA3 | 0.11074591 | 4.74182895 | Methyl-accepting chemotaxis protein Ctp       |
| FimL | Q9HWW5 | 0.1104576  | 3.10479828 | Uncharacterized protein                       |
| FimL | P57703 | 0.1099789  | 6.11092318 | 5-methyltetrahydropteroyltriglutamate--f      |
| FimL | Q59638 | 0.10914266 | 0.93723532 | Dihydrolipoyllysine-residue acetyltransfer    |
| FimL | Q9I524 | 0.10838014 | 2.973182   | GTP pyrophosphokinase                         |
| FimL | Q9I4K8 | 0.10826955 | 1.42276379 | Probable oxidoreductase                       |
| FimL | Q9HVV6 | 0.10772341 | 3.13464471 | Probable cytochrome c1                        |
| FimL | Q9HU38 | 0.10571073 | 3.64219504 | Uncharacterized protein                       |
| FimL | P22608 | 0.10455813 | 6.81982165 | Type 4 fimbrial assembly protein PilB         |
| FimL | Q9HYP2 | 0.10384121 | 1.48517987 | Uncharacterized protein                       |
| FimL | Q9HW49 | 0.10294797 | 4.30496306 | Uncharacterized protein                       |
| FimL | Q9HUM7 | 0.10011751 | 2.14750886 | Ribonuclease R (RNase R) (EC 3.1.13.1)        |
| FimL | Q9I4N9 | 0.09999903 | 2.56855665 | Uncharacterized protein                       |
| FimL | Q9HW16 | 0.09984376 | 1.87832689 | Uncharacterized protein                       |

|      |        |            |            |                                             |
|------|--------|------------|------------|---------------------------------------------|
| FimL | Q9I244 | 0.09965577 | 5.67323169 | Elongation factor G 2 (EF-G 2)              |
| FimL | Q9I0Q0 | 0.09943046 | 4.57053656 | Probable FAD-dependent monooxygenase        |
| FimL | Q9HUC0 | 0.09634746 | 3.56028226 | Ubiquinone/menaquinone biosynthesis C       |
| FimL | Q9HUC5 | 0.09619047 | 5.49817846 | ATP-dependent protease ATPase subunit       |
| FimL | G3XD93 | 0.09553802 | 4.03282271 | Probable chaperone                          |
| FimL | P26275 | 0.09450311 | 1.40131589 | Positive alginate biosynthesis regulatory p |
| FimL | Q9I0Z9 | 0.09133076 | 2.30272648 | Uncharacterized protein                     |
| FimL | Q9HYT0 | 0.09055973 | 2.71133094 | Phosphonates import ATP-binding proteir     |
| FimL | Q9I2S9 | 0.0867297  | 2.57959724 | Ribonuclease HI (RNase HI) (EC 3.1.26.4)    |
| FimL | Q9HYN5 | 0.08629837 | 3.06273662 | Fucose-binding lectin PA-III                |
| FimL | Q9I368 | 0.08594644 | 1.67587455 | Uncharacterized protein                     |
| FimL | Q9I0P9 | 0.08493287 | 1.85155409 | Probable transcriptional regulator          |
| FimL | Q9I297 | 0.08368923 | 2.43729224 | Methylcrotonyl-CoA carboxylase, beta-sul    |
| FimL | Q9HZA7 | 0.08343831 | 2.73301831 | Acetyl-coenzyme A carboxylase carboxyl t    |
| FimL | Q51373 | 0.08117668 | 2.35912605 | Response regulator GacA (Global activato    |
| FimL | Q9HUD4 | 0.07927365 | 1.68576281 | Uncharacterized protein                     |
| FimL | Q9HWV0 | 0.07886354 | 3.63524017 | Probable nonribosomal peptide synthetas     |
| FimL | Q9I1H5 | 0.07717267 | 1.8733548  | Chitinase                                   |
| FimL | Q9HXM6 | 0.07659492 | 4.41663734 | GMP synthase [glutamine-hydrolyzing] (Ei    |
| FimL | Q9I2Y7 | 0.07642121 | 2.58599501 | Phospho-2-dehydro-3-deoxyheptonate al       |
| FimL | Q9I5T8 | 0.07603404 | 3.29487526 | Probable two-component sensor               |
| FimL | Q9I0G1 | 0.07589206 | 3.37019313 | Probable type II secretion protein          |
| FimL | G3XD47 | 0.07587047 | 2.87504775 | Arginine/ornithine binding protein AotJ     |
| FimL | Q9I742 | 0.07546947 | 6.36220223 | Protein ClpV1                               |
| FimL | Q9I6C8 | 0.07511661 | 5.93682135 | Probable coniferyl aldehyde dehydrogena     |
| FimL | Q9I6L0 | 0.07382874 | 2.07735507 | Sulfate/thiosulfate import ATP-binding pr   |
| FimL | Q9HU72 | 0.07381971 | 2.70821412 | Lactoylglutathione lyase (EC 4.4.1.5) (Aldc |
| FimL | Q9I2D5 | 0.07170196 | 1.43846961 | Uncharacterized protein                     |
| FimL | Q51470 | 0.06920751 | 3.45342031 | tRNA-2-methylthio-N(6)-dimethylallyladei    |
| FimL | Q9I5A5 | 0.06707403 | 2.80053957 | Phosphate acetyltransferase (EC 2.3.1.8) (  |
| FimL | Q9HWW1 | 0.06586628 | 2.95389848 | Outer membrane protein OprG                 |
| FimL | Q9S646 | 0.06585139 | 4.60236011 | Polyphosphate kinase (EC 2.7.4.1) (ATP-pr   |
| FimL | Q9I2W7 | 0.06580035 | 1.39321648 | Putative regulator of ribonuclease activity |
| FimL | Q9HWH1 | 0.06544651 | 2.18583266 | Phenazine biosynthesis protein PhzA 1       |
| FimL | Q9I405 | 0.0644659  | 2.02742833 | Amino acid ABC transporter ATP binding p    |
| FimL | Q9HW30 | 0.06392998 | 2.24554746 | Uncharacterized protein                     |
| FimL | Q9HVV1 | 0.06372815 | 2.65135319 | Probable ATP-binding component of ABC       |
| FimL | Q9HW04 | 0.06354415 | 1.93799045 | Arginine biosynthesis bifunctional protein  |
| FimL | Q9HVV2 | 0.06272598 | 2.3164067  | Probable permease of ABC transporter        |
| FimL | Q9HX20 | 0.05922714 | 3.46169902 | Gamma-glutamyl phosphate reductase (G       |
| FimL | Q9LCT3 | 0.05914241 | 4.74813692 | Protein translocase subunit SecA            |
| FimL | Q9I788 | 0.05863355 | 4.17181214 | Exoenzyme T                                 |
| FimL | P43336 | 0.05862746 | 2.85206717 | Aromatic-amino-acid aminotransferase (E     |
| FimL | Q9XCX9 | 0.05835124 | 3.81477075 | Ribonuclease 3 (EC 3.1.26.3) (Ribonucleas   |
| FimL | Q9HTW5 | 0.05755425 | 1.60349288 | UPF0149 protein PA5225                      |

|      |         |            |            |                                             |
|------|---------|------------|------------|---------------------------------------------|
| FimL | Q9I0W8  | 0.05652033 | 1.8919176  | Anthranilate dioxygenase reductase          |
| FimL | Q9HT45  | 0.05614245 | 2.07154315 | Uncharacterized protein                     |
| FimL | Q9I6B4  | 0.05540268 | 1.62267786 | Thiazole synthase (EC 2.8.1.10)             |
| FimL | Q9HZY7  | 0.0553918  | 3.02568663 | Probable ATP-binding component of ABC       |
| FimL | Q9I0A4  | 0.05523012 | 4.05394088 | Phenylalanine--tRNA ligase beta subunit (   |
| FimL | Q9HVVX4 | 0.05510487 | 2.63964371 | Uncharacterized protein                     |
| FimL | Q9I3F5  | 0.05490576 | 2.69591944 | Aconitate hydratase 1 (Aconitase 1) (EC 4.  |
| FimL | Q51390  | 0.05488852 | 3.14427292 | Glycerol kinase 2 (EC 2.7.1.30) (ATP:glycer |
| FimL | Q9I0L8  | 0.05321379 | 2.41627054 | ATP-binding protease component ClpA         |
| FimL | Q9X2N2  | 0.05319369 | 3.43859418 | 6-phosphogluconolactonase (6PGL) (EC 3.     |
| FimL | P20576  | 0.05252607 | 2.17793859 | Anthranilate synthase component 2 (AS) (    |
| FimL | Q9I6M4  | 0.05169455 | 2.35105508 | 5-aminovalerate aminotransferase DavT (     |
| FimL | Q9HXZ1  | 0.05085243 | 3.26736432 | DNA polymerase III subunit alpha (EC 2.7.   |
| FimL | Q9HYF6  | 0.05043467 | 2.30900214 | Probable antioxidant protein                |
| FimL | Q9HY25  | 0.04958057 | 2.09906468 | 50S ribosomal protein L31 type B            |
| FimL | Q9I0L6  | 0.04942213 | 1.94749731 | Cold-shock protein CspD                     |
| FimL | Q9I6J1  | 0.04922058 | 1.43899664 | Putrescine-binding periplasmic protein      |
| FimL | Q51466  | 0.04866703 | 1.93435274 | Flagellar motor switch protein FlIN         |
| FimL | Q9HWG5  | 0.04821215 | 2.40266853 | Pyochelin biosynthetic protein PchG         |
| FimL | Q9HXU0  | 0.04734394 | 2.14216339 | Lysine--tRNA ligase (EC 6.1.1.6) (Lysyl-tRN |
| FimL | Q9HX32  | 0.04687874 | 1.23800312 | LPS-assembly lipoprotein LptE               |
| FimL | Q9HWW4  | 0.04673732 | 2.10523783 | Probable ATP-binding component of ABC       |
| FimL | G3XDA1  | 0.0463949  | 5.5838776  | Exoenzyme S                                 |
| FimL | Q9HXY0  | 0.04595225 | 1.89715617 | Probable aminotransferase                   |
| FimL | Q51472  | 0.04593568 | 1.50716133 | Integration host factor subunit alpha (IHF- |
| FimL | Q9HYZ6  | 0.04580375 | 2.59407302 | Site-determining protein                    |
| FimL | Q9HVK8  | 0.04544465 | 2.11348906 | Probable ATP-dependent protease             |
| FimL | P52111  | 0.04432593 | 3.50674139 | Glycerol-3-phosphate dehydrogenase (EC      |
| FimL | Q9HZG2  | 0.04376809 | 1.32249389 | Uncharacterized protein                     |
| FimL | Q9I046  | 0.04373905 | 1.10090228 | Uncharacterized protein                     |
| FimL | Q9HZI9  | 0.04360781 | 2.48270552 | Universal stress protein                    |
| FimL | Q9HXZ2  | 0.04302713 | 2.90432055 | Acetyl-coenzyme A carboxylase carboxyl t    |
| FimL | Q9HW02  | 0.04185124 | 1.83393109 | UDP-N-acetylmuramate--L-alanine ligase (    |
| FimL | Q51551  | 0.04120921 | 1.73902442 | Dihydroorotase-like protein (Aspartate ca   |
| FimL | P33641  | 0.04055616 | 2.27950706 | Outer membrane protein assembly factor      |
| FimL | Q9I0J4  | 0.03993942 | 1.85545622 | NADH-quinone oxidoreductase subunit I (     |
| FimL | Q9HUM8  | 0.03965253 | 1.45809813 | 23S rRNA (guanosine-2'-O-)-methyltransfe    |
| FimL | Q9HYG4  | 0.03941029 | 2.91086253 | Aliphatic sulfonates import ATP-binding p   |
| FimL | Q9HT39  | 0.03880647 | 4.96198688 | Uncharacterized protein                     |
| FimL | Q9HWG0  | 0.03863211 | 2.79442298 | UvrABC system protein A (UvrA protein) (    |
| FimL | Q9I323  | 0.03842338 | 2.33860832 | Translocator outer membrane protein Poj     |
| FimL | Q9I149  | 0.03808591 | 1.89044002 | Uncharacterized protein                     |
| FimL | P25084  | 0.03651995 | 3.58930226 | Transcriptional activator protein LasR      |
| FimL | Q9I5Y1  | 0.03647114 | 2.12420851 | Fructose-bisphosphate aldolase (FBP aldo    |
| FimL | Q9I0K0  | 0.03639387 | 2.1328397  | NADH-quinone oxidoreductase subunit B       |

|      |        |            |            |                                              |
|------|--------|------------|------------|----------------------------------------------|
| FimL | Q9HVU7 | 0.03592527 | 1.81454476 | Uncharacterized protein                      |
| FimL | Q9HTL5 | 0.03540724 | 1.97960334 | Uncharacterized protein                      |
| FimL | Q9HXI2 | 0.03367467 | 1.55784128 | Protein translocase subunit SecF             |
| FimL | Q9I407 | 0.03346834 | 1.77313242 | Glutaminase-asparaginase (EC 3.5.1.38) (L    |
| FimL | Q9I6J3 | 0.03292933 | 2.35665795 | Probable glutamine synthetase                |
| FimL | Q9HUP3 | 0.03275991 | 1.90645412 | NH(3)-dependent NAD(+) synthetase (EC        |
| FimL | Q9HY13 | 0.03233351 | 2.75401335 | Uncharacterized protein                      |
| FimL | P29365 | 0.03162423 | 2.09633118 | Homoserine dehydrogenase (HDH) (EC 1.:       |
| FimL | Q9HXH0 | 0.03137276 | 3.07659224 | Valine--tRNA ligase (EC 6.1.1.9) (Valyl-tRN  |
| FimL | Q9I502 | 0.0297338  | 2.08893798 | Proline--tRNA ligase (EC 6.1.1.15) (Prolyl-t |
| FimL | Q9I6M5 | 0.0296165  | 2.18029635 | Glutarate-semialdehyde dehydrogenase [       |
| FimL | Q9I3G4 | 0.02866865 | 2.26926182 | Cytochrome c oxidase, cbb3-type, CcoO si     |
| FimL | G3XCT6 | 0.02851593 | 1.27375629 | Probable two-component sensor                |
| FimL | P37799 | 0.02818485 | 1.65984393 | Biotin carboxyl carrier protein of acetyl-Cr |
| FimL | Q9HXY4 | 0.02781176 | 1.99502562 | Outer membrane protein assembly factor       |
| FimL | Q9HWK5 | 0.02760313 | 3.20993055 | Peptidyl-prolyl cis-trans isomerase C2       |
| FimL | Q9HYC7 | 0.02731178 | 2.10326573 | Methionine--tRNA ligase (EC 6.1.1.10) (M     |
| FimL | Q9I0Z0 | 0.02676543 | 3.65348581 | Transcriptional regulator MexT               |
| FimL | Q9HVS8 | 0.02636938 | 1.16731805 | RoxR                                         |
| FimL | Q9HVH9 | 0.0259725  | 1.6004299  | Uncharacterized protein                      |
| FimL | Q9HX34 | 0.0259205  | 1.88295299 | Uncharacterized protein                      |
| FimL | Q9HUC6 | 0.0257801  | 2.25509503 | ATP-dependent protease subunit HslV (EC      |
| FimL | Q9HUD3 | 0.02570578 | 4.2896945  | Malic enzyme                                 |
| FimL | Q9I0L4 | 0.02483216 | 3.88294699 | Isocitrate dehydrogenase                     |
| FimL | Q9I0A5 | 0.02438391 | 1.80979425 | Uncharacterized protein                      |
| FimL | Q9HY84 | 0.02308637 | 1.72642956 | Argininosuccinate synthase (EC 6.3.4.5) (C   |
| FimL | P07344 | 0.0228888  | 2.67700196 | Tryptophan synthase alpha chain (EC 4.2.:    |
| FimL | Q9X6R0 | 0.02150062 | 2.76749495 | Spermidine synthase 1 (EC 2.5.1.16) (Putr    |
| FimL | Q9HXV4 | 0.02056715 | 2.6195603  | Adenylate kinase (AK) (EC 2.7.4.3) (ATP-AI   |
| FimL | Q9HTN9 | 0.02013378 | 1.28192115 | 50S ribosomal protein L33                    |
| FimL | Q9HV90 | 0.01983835 | 1.44897651 | Heme-transport protein, PhuT                 |
| FimL | Q9RQ16 | 0.01975779 | 1.68146809 | UPF0301 protein AlgH                         |
| FimL | Q9I6A7 | 0.01957112 | 2.02427606 | Uncharacterized protein                      |
| FimL | Q9HX05 | 0.01946572 | 1.97227325 | Probable aldehyde dehydrogenase              |
| FimL | Q9HYC8 | 0.01945005 | 1.75379543 | Uncharacterized protein                      |
| FimL | Q9HYD5 | 0.01927503 | 3.6752178  | NAD-dependent malic enzyme (NAD-ME)          |
| FimL | P31961 | 0.01921961 | 2.36583616 | Phosphogluconate dehydratase (EC 4.2.1.      |
| FimL | Q9HZQ2 | 0.01896076 | 2.87645397 | Protein CobW                                 |
| FimL | Q9HVA0 | 0.01784521 | 1.62376892 | Acetolactate synthase large subunit          |
| FimL | Q9HVS6 | 0.01782045 | 2.13047117 | Uncharacterized protein                      |
| FimL | P29363 | 0.0173853  | 1.88384296 | Threonine synthase (TS) (EC 4.2.3.1)         |
| FimL | G3XD76 | 0.01719321 | 1.82394229 | 2,3,4,5-tetrahydropyridine-2,6-dicarboxyl    |
| FimL | Q9I6Z1 | 0.01716508 | 2.13728214 | Uncharacterized protein                      |
| FimL | Q9L7T2 | 0.01610756 | 2.77201037 | Formamidopyrimidine-DNA glycosylase (F       |
| FimL | Q9HW72 | 0.01610294 | 2.49746277 | Pyruvate kinase (EC 2.7.1.40)                |

|      |        |            |            |                                                     |
|------|--------|------------|------------|-----------------------------------------------------|
| FimL | Q51548 | 0.01555436 | 2.88069682 | L-ornithine 5-monooxygenase (EC 1.13.12)            |
| FimL | Q9I0A3 | 0.01551693 | 2.08574171 | Phenylalanine--tRNA ligase alpha subunit            |
| FimL | Q9I4I1 | 0.01516117 | 2.00593484 | Ribonucleoside-diphosphate reductase (E             |
| FimL | Q9HVM4 | 0.01514646 | 1.9909392  | Isoleucine--tRNA ligase (EC 6.1.1.5) (Isoleu        |
| FimL | G3XCX8 | 0.01513237 | 1.91974088 | Uncharacterized protein                             |
| FimL | P23189 | 0.0144738  | 1.72500327 | Glutathione reductase (GR) (GRase) (EC 1.           |
| FimL | Q9I2T9 | 0.01400758 | 2.26179841 | Lon protease (EC 3.4.21.53) (ATP-depend             |
| FimL | O33877 | 0.01264684 | 1.82443547 | 3-hydroxydecanoyl-[acyl-carrier-protein] r          |
| FimL | Q9HTN4 | 0.01262867 | 1.3192428  | Phosphopantothenoylecysteine synthase/(             |
| FimL | Q9HZP8 | 0.01243552 | 1.56868005 | Putative reductase PA2950 (EC 1.3.1.-)              |
| FimL | Q9HYK7 | 0.01191357 | 2.41473405 | Ferredoxin--NADP+ reductase                         |
| FimL | Q9HY63 | 0.01180553 | 4.20454085 | Bifunctional polymyxin resistance protein           |
| FimL | P14532 | 0.01154879 | 2.56816921 | Cytochrome c551 peroxidase (CCP) (Cytoc             |
| FimL | Q9I246 | 0.01116296 | 3.34754644 | Probable carbamoyl transferase                      |
| FimL | Q9I585 | 0.0110037  | 1.80415722 | Uncharacterized protein                             |
| FimL | O54438 | 0.01080094 | 1.18008314 | 3-oxoacyl-[acyl-carrier-protein] reductase          |
| FimL | Q9I3L8 | 0.01066765 | 1.37294388 | Uncharacterized protein                             |
| FimL | Q9HU11 | 0.01065692 | 1.1530467  | Uncharacterized protein                             |
| FimL | Q9HWC4 | 0.01058885 | 1.25743343 | Transcription termination/antiterminatio            |
| FimL | Q9HYG0 | 0.01030115 | 2.28047609 | Uncharacterized protein                             |
| FimL | Q9HVI7 | 0.01026811 | 2.11142293 | Serine hydroxymethyltransferase 3 (SHM <sup>r</sup> |
| FimL | Q51404 | 0.00999444 | 3.18420761 | Fumarate hydratase class II 1 (Fumarase C           |
| FimL | Q9I3X2 | 0.00976348 | 1.47346328 | Uncharacterized protein                             |
| FimL | Q9HYX8 | 0.00955525 | 1.05346508 | Peptidyl-prolyl cis-trans isomerase (EC 5.2         |
| FimL | Q9HUL8 | 0.00858088 | 3.6318396  | DNA mismatch repair protein MutL                    |
| FimL | P53641 | 0.00844016 | 1.16881605 | Superoxide dismutase [Fe] (EC 1.15.1.1)             |
| FimL | Q9I5A7 | 0.00829034 | 1.20220987 | Uncharacterized protein                             |
| FimL | Q9I1W9 | 0.00774592 | 1.46221273 | Uncharacterized protein                             |
| FimL | Q9HUX4 | 0.00763549 | 4.28447561 | Uncharacterized protein                             |
| FimL | G3XD11 | 0.00755034 | 2.58087091 | PhoP/Q and low Mg <sup>2+</sup> inducible outer me  |
| FimL | Q9I402 | 0.00736771 | 1.0687295  | Probable binding protein component of A             |
| FimL | Q9HVV4 | 0.00717066 | 0.745352   | Ubiquinol-cytochrome c reductase iron-su            |
| FimL | Q9I157 | 0.00713901 | 2.31618125 | PvdL                                                |
| FimL | Q9I4T3 | 0.0071199  | 1.23702589 | Probable outer membrane protein                     |
| FimL | Q9HZJ2 | 0.00634906 | 1.21591562 | Fatty acid oxidation complex subunit alph           |
| FimL | Q9HY65 | 0.00537191 | 1.37484849 | UDP-4-amino-4-deoxy-L-arabinose--oxogl              |
| FimL | G3XCX3 | 0.00523242 | 2.9445515  | Twitching motility protein PilU                     |
| FimL | Q9I5I4 | 0.00483057 | 1.71685829 | Probable enoyl-CoA hydratase/isomerase              |
| FimL | Q9HXM5 | 0.00436249 | 1.56315531 | Inosine-5'-monophosphate dehydrogenas               |
| FimL | O68822 | 0.00407296 | 1.17060866 | Cytosol aminopeptidase (EC 3.4.11.1) (Leu           |
| FimL | Q9HTE9 | 0.0037569  | 3.30663263 | Serine hydroxymethyltransferase 1 (SHM <sup>r</sup> |
| FimL | Q9HV55 | 0.00167578 | 1.16317353 | Translation initiation factor IF-2                  |
| FimL | Q9I399 | 0.00111092 | 1.38602941 | Uncharacterized protein                             |
| FimL | Q9I5F9 | 0.00063241 | 2.02159977 | Lon protease (EC 3.4.21.53) (ATP-depend             |
| FimL | Q9HW65 | 0.00049181 | 1.28291709 | Uncharacterized protein                             |

Gene.names

fimL PA1822  
PA4165  
PA3233  
tonB3 PA0406  
fimV PA3115  
PA1648  
PA3765  
PA4644  
PA1661  
PA2983  
PA1825  
pilQ PA5040  
gbuA PA1421  
PA5520  
PA1852  
PA0950  
PA2017  
tolR PA0970  
nqrF PA2994  
hisB PA5143  
nadK PA3088  
psd PA4957  
PA1828  
PA1745  
zipA PA1528  
PA0171  
nqrC PA2997  
PA4636  
PA0135  
PA1821  
PA4754  
folA PA0350  
PA1814  
pctC PA4307  
PA1508  
PA5432  
nqrA PA2999  
PA5517  
PA1040  
eraR PA1980  
PA3888  
tatA PA5068  
eutC PA4025  
PA3345

PA2943  
PA0753  
PA5026  
queG PA4950  
PA1653  
PA4831  
xpt PA5298  
PA5486  
nudC PA1823  
PA2088  
cyoA PA1317  
PA3499  
PA3110  
PA0179  
PA2537  
PA3093  
rlpA PA4000  
PA3143  
PA5543  
PA0830  
PA4899  
PA2110  
PA4667  
PA5362  
PA5514  
PA0452  
PA3768  
PA1522  
pcaT PA0229  
PA5487  
PA3839  
PA4659  
ampD PA4522  
trpF PA3113  
pbpA PA4003  
PA2086  
PA5474  
PA5279  
PA2820  
PA1236  
PA2846  
PA5364  
PA2920  
ispH lytB PA4557  
PA0049

PA3804  
ftsX PA0375  
PA2963  
wbpJ PA3147  
nhaP PA3887  
PA0454  
PA5309  
PA0545  
nuoL PA2647  
cupB3 PA4084  
spuC PA0299  
PA3340  
ahcY sahH PA0432  
Irp PA5308  
hslO PA5193  
cycH PA1483  
PA3272  
maiA PA2007  
leuC PA3121  
algQ algR2 PA5255  
PA3468  
rimM PA3744  
PA0020  
PA3021  
pyrR PA0403  
PA0664  
pscQ PA1694  
PA0359  
PA0083  
PA1166  
PA4489  
ccmE cycJ PA1479  
PA2854  
exaA PA1982  
PA2504  
PA3723  
PA4342  
PA0387  
alr PA4930  
atuA PA2886  
PA5232  
pscG PA1720  
PA0743  
mmsA PA3570  
iscR PA3815

recG PA5345  
PA1924  
gltA PA1580  
PA5004  
aer PA1561  
PA5347  
phzB2 PA1900  
PA3694  
thil PA5118  
def PA0019  
PA4633  
PA1608  
PA2491  
clpP1 PA1801  
PA2285  
rpsR PA4934  
PA3598  
leuD PA3120  
PA5027  
glpK1 glpK2 PA3579  
pctB PA4310  
adhC PA3629  
rplY ctc PA4671  
PA0084  
acnB PA1787  
rep PA5296  
algP algR3 PA5253  
hemH PA4655  
wbpG PA3150  
rplE PA4251  
sdhB PA1584  
aotP PA0892  
liuA PA2015  
atpD PA5554  
glnA PA5119  
rpsE PA4246  
PA4131  
rplD PA4262  
sucB PA1586  
PA1440  
rplN PA4253  
rplR PA4247  
murG PA4412  
rplI PA4932  
hupB PA1804

rpsK PA4240  
ilvA1 PA0331  
cheR1 PA3348  
rpsI PA4432  
rplL PA4271  
wbpW PA5452  
atpA PA5556  
PA3415  
acpP1 acpP PA2966  
PA1607  
PA2431  
groL groEL mopA PA4385  
ahpC PA0139  
rpmE PA5049  
PA1285  
rplS PA3742  
rplP PA4256  
rplF PA4248  
rplW PA4261  
wbpB wlbA PA3158  
PA2393  
iscU PA3813  
rpsP PA3745  
PA0011  
PA2734  
PA4928  
wbpl PA3148  
tufA PA4265; tufB PA4277  
rplV PA4258  
iscS PA3814  
sucC PA1588  
fabF1 PA2965  
PA5257  
mreB PA4481  
rpsH PA4249  
rpsA PA3162  
sdhA PA1583  
rplM PA4433  
rpsB PA3656  
rpmC PA4255  
PA1769  
algB PA5483  
PA2634  
PA5005  
cysQ PA5175

murA PA4450  
rpsG PA4267  
ambB PA2305  
PA3529  
recA PA3617  
dnaK PA4761  
rplJ PA4272  
sucD PA1589  
atoB PA2001  
rpsC PA4257  
PA0924  
rpsJ PA4264  
PA3729  
mucA PA0763  
PA3309  
serA PA0316  
PA3965  
rplC PA4263  
rpoB PA4270  
parC PA4964  
rpsT PA4563  
PA3040  
PA3031  
bauC PA0130  
eno PA3635  
lecA pa1L PA2570  
rpmF PA2970  
sucA PA1585  
bkdA1 PA2247  
rpsF PA4935  
rplK PA4274  
rpoC PA4269  
PA4642  
rplA PA4273  
rplU PA4568  
pilA fimA PA4525  
PA1551  
phaF PA5060  
hpd PA0865  
rpsD PA4239  
minE PA3245  
pscE PA1718  
atpG PA5555  
hflD PA2627  
rpoA PA4238

rplO PA4244  
PA4639  
PA5258  
ftsI PA4418  
lpxO2 PA0936  
secB PA5128  
nuoC nuoCD nuoD PA2639  
thrS PA2744  
rplB PA4260  
gcvP1 PA2445  
phzF1 phzF PA1904; phzF2 PA4215  
fur PA4764  
rpmB PA5316  
PA2707  
ppiD PA1805  
PA0588  
glmS PA5549  
fusA fusA1 PA4266  
oprF PA1777  
wbpD PA3156  
rpsQ PA4254  
PA2788  
PA0189  
aspS PA0963  
rplT PA2741  
der engA PA3799  
arcA PA5171  
PA0759  
PA3533  
wbpE PA3155  
aceE aceA PA5015  
nrdB PA1155  
gltX PA3134  
PA0423  
atpF PA5558  
atpH PA5557  
bkdA2 PA2248  
PA2581  
antA PA2512  
rho PA5239  
pcrD PA1703  
PA5291  
rplX PA4252  
ambE PA2302  
fleQ PA1097

rplQ PA4237  
glmM PA4749  
infC PA2743  
serC PA3167  
mvaT PA4315  
rpsN PA4250  
PA3956  
hupA PA5348  
ispB PA4569  
PA2654  
rpsL PA4268  
PA3822  
rpmD PA4245  
PA4595  
icd PA2623  
PA2328  
amgR PA5200  
rpsM PA4241  
rsmB rrmB PA0017  
ftsA PA4408  
surE PA3625  
prpC PA0795  
exsD PA1714  
cysB PA1754  
hprA PA4626  
bolA PA0857  
PA3023  
rlmD rumA PA0933  
PA2119  
ibpA PA3126  
PA4333  
rpoN PA4462  
nuoF PA2641  
PA2980  
PA0962  
PA2667  
hcp1 PA0085  
PA2937  
purM PA0945  
PA3801  
clpX PA1802  
pqsC PA0998  
pal oprL PA0973  
recJ PA3725  
purA PA4938

PA4913  
iscA PA3812  
antB PA2513  
fabB PA1609  
PA0754  
phoP PA1179  
pslB PA2232  
accC fabG PA4848  
phhB PA0871  
katA PA4236  
PA3440  
grpE PA4762  
oprI PA2853  
carB PA4756  
PA4738  
cbpD PA0852  
PA5245  
bcp PA1008  
algC PA5322  
vfr PA0652  
PA2412  
bkdB PA2249  
pnp PA4740  
lpxC envA PA4406  
PA0269  
pheA PA3166  
PA0937  
PA5339  
fahA PA2008  
gyrA PA3168  
recQ PA3344  
prs PA4670  
pvdP PA2392  
oxyR PA5344  
ilvC PA4694  
groS groES mopB PA4386  
mgtE PA0913  
PA0372  
PA2190  
metK PA0546  
etfB PA2952  
wbpA PA3159  
wbpH PA3149  
PA2331  
PA5001

hmgA PA2009  
nuoE PA2640  
alaS PA0903  
ftsZ PA4407  
phoU PA5365  
PA0070  
clpP2 PA3326  
PA2705  
htpG PA1596  
rpsS PA4259  
icmP PA4370  
selD PA1642  
PA3849  
cysNC cysN PA4442  
fadD1 PA3299  
PA4461  
leuB PA3118  
hemL PA3977  
PA1833  
liuD PA2012  
spul PA0296  
PA4426  
PA4129  
dsdA PA3357  
PA1746  
galU PA2023  
fliC PA1092  
ffh PA3746  
PA3295  
PA1832  
dctA2 PA1183  
rne PA2976  
eco PA2755  
PA4998  
rpoD rpoDA PA0576  
dksA PA4723  
cbrB PA4726  
PA0218  
ispG PA3803  
mexH PA4206  
secD PA3821  
rapA hepA PA3308  
ltaE PA5413  
adhA PA5427  
carA PA4758

tig PA1800  
PA3416  
zwf PA3183  
pilM PA5044  
speA PA4389  
lpdG PA1587  
PA4452  
PA5295  
PA4387  
rpsU PA0579  
pyrG PA3637  
tsf PA3655  
gap hexC PA3195  
fkIB PA4572  
cysD PA4443  
dapA PA1010  
atpC PA5553  
nfuA PA1847  
phzS PA4217  
ppa PA4031  
PA1009  
PA2823  
PA3341  
parE PA4967  
PA3001  
metF PA0430  
glyS PA0008  
pntAA PA0195  
tpx PA2532  
PA4685  
gdhA PA4588  
fdhA PA5421  
PA5072  
nuoG PA2642  
hemN PA1546  
dapB PA4759  
dnaN PA0002  
hisD PA4448  
PA4130  
hldE rfaE PA4996  
PA3349  
PA3417  
rdgC PA3263  
flgK PA1086  
ilvD PA0353

gyrB PA0004  
PA2783  
ssb PA4232  
acsA2 acsB PA4733  
hldD rfaD PA3337  
ssuD PA3444  
nusA PA4745  
dnaJ PA4760  
prmB PA1678  
pilG PA0408  
ppiB PA1793  
PA3225  
mexB PA0426  
PA0317  
braC PA1074  
PA3330  
leuA PA3792  
ftsH PA4751  
gdhB PA3068  
lptF PA3692  
phzB1 PA4211  
etfA PA2951  
sthA sth PA2991  
PA5028  
ppsA PA1770  
lepA le PA0767  
PA1159  
PA1658  
trxA trx PA5240  
PA4739  
dnaA PA0001  
ctpH PA2561  
PA4063  
metE PA1927  
aceF aceB PA5016  
relA PA0934  
PA1127  
PA4429  
PA5146  
pilB PA4526  
PA3354  
PA4352  
rnr PA4937  
PA1090  
PA4388

fusB fusA2 PA2071  
pqsH PA2587  
ubiE PA5063  
hslU PA5054  
PA3842  
algR PA5261  
PA2483  
phnC1 PA3314  
rnhA PA1815  
lecB PA3361  
PA1657  
PA2588  
liuB PA2014  
accD PA3112  
gacA PA2586  
PA5037  
PA4078  
chiC PA2300  
guaA PA3769  
PA1750  
PA0600  
PA2677  
aotJ PA0888  
clpV1 PA0090  
calB PA0366  
cysA PA0280  
gloA PA5111  
PA1969  
miaB PA3980  
pta PA0835  
oprG PA4067  
ppk PA5242  
PA1772  
phzA1 PA4210  
PA1339  
PA4372  
PA4456  
argJ PA4402  
PA4455  
proA PA4007  
secA PA4403  
exoT PA0044  
phhC PA0870  
rnc PA0770  
PA5225

antC PA2514  
PA5528  
thiG PA0381  
PA2857  
pheT PA2739  
PA4441  
acnA PA1562  
glpK2 glpK glpK1 PA3582  
clpA PA2620  
pgl devB PA3182  
trpG PA0649  
davT PA0266  
dnaE PA3640  
PA3450  
rpmE2 PA3601  
cspD PA2622  
spuD PA0300  
fliN PA1444  
pchG PA4224  
lysS PA3700  
lptE PA3988  
PA4064  
exoS PA3841  
PA3659  
ihfA himA PA2738  
minD PA3244  
PA4576  
glpD PA3584  
PA3046  
PA2797  
PA3017  
accA PA3639  
murC PA4411  
pyrC' pyrX PA0401  
bamD PA4545  
nuoI PA2644  
rlmB PA4936  
ssuB1 PA3442  
PA5535  
uvrA PA4234  
popD PA1709  
PA2433  
lasR PA1430  
fba fda PA0555  
nuoB PA2638

PA4474  
PA5343  
secF PA3820  
ansB PA1337  
spuB PA0298  
nadE PA4920  
PA3613  
hom PA3736  
valS PA3834  
proS PA0956  
davD PA0265  
ccoO1 PA1553  
PA1458  
accB fabE PA4847  
opr86 bamA PA3648  
ppiC2 PA4176  
metG PA3482  
mexT PA2492  
roxR PA4493  
PA4611  
PA3986  
hsIV PA5053  
PA5046  
idh PA2624  
PA2737  
argG PA3525  
trpA PA0035  
speE1 speE PA1687  
adk PA3686  
rpmG PA5315  
phuT PA4708  
algH PA0405  
PA0388  
PA4022  
PA3481  
maeA PA3471  
edd PA3194  
cobW PA2945  
ilvI PA4696  
PA4495  
thrC PA3735  
dapD PA3666  
PA0141  
mutM fpg PA0357  
pykA PA4329

pvdA pvd-1 PA2386  
pheS PA2740  
nrdA PA1156  
ileS PA4560  
PA0900  
gor PA2025  
lon PA1803  
fabA PA1610  
coaC PA5320  
PA2950  
fpr PA3397  
arnA PA3554  
ccpA PA4587  
PA2069  
PA0856  
fabG PA2967  
PA1494  
PA5178  
nusG PA4275  
PA3446  
glyA2 PA4602  
fumC1 PA4470  
PA1372  
PA3262  
mutL PA4946  
sodB PA4366  
PA0833  
PA2146  
PA4836  
oprH PA1178  
PA1342  
PA4431  
pvdL PA2424  
PA1041  
fadB PA3014  
arnB PA3552  
pilU PA0396  
PA0745  
guaB PA3770  
pepA phpA PA3831  
glyA1 PA5415  
infB PA4744  
PA1623  
lon PA0779  
PA4336
