# Supplementary material
Source: PubMed Central journal article supplement (PMC4980298)
Supplement: NIHMS788409-supplement-Supp_Table_1_PilG.pdf [file NIHMS788409-supplement-Supp_Table_1_PilG.pdf]

| Bait | Prey (Unipro | MIST       | Compass    | Protein.names                            |
|------|--------------|------------|------------|------------------------------------------|
| PiIG | P46384       | 0.94756483 | 533.120937 | Protein PiIG                             |
| PiIG | Q9HVVU3      | 0.92980307 | 442.797676 | Maf-like protein PA4478                  |
| PiIG | Q9HVVH2      | 0.90073391 | 2158.29052 | Probable c-type cytochrome               |
| PiIG | Q9I4E1       | 0.89799766 | 199.613144 | NAD-dependent protein deacylase 2 (E     |
| PiIG | Q9HTZ6       | 0.89690122 | 135.494044 | 33 kDa chaperonin (Heat shock protein    |
| PiIG | Q9I6V0       | 0.89157802 | 169.520896 | Probable short-chain dehydrogenase       |
| PiIG | Q9X6V8       | 0.85480747 | 84.5944088 | UPF0250 protein PA3998                   |
| PiIG | Q9HVL7       | 0.83948028 | 58.0947502 | 50S ribosomal protein L27                |
| PiIG | Q51465       | 0.83947855 | 19.7924499 | Flagellar motor switch protein FliM      |
| PiIG | P37452       | 0.83801107 | 123.237575 | LexA repressor (EC 3.4.21.88)            |
| PiIG | Q9HVVH1      | 0.83357547 | 91.8558654 | Uncharacterized protein                  |
| PiIG | Q9HZ62       | 0.83272804 | 93.9719614 | Phosphoglycolate phosphatase 2 (PGP :    |
| PiIG | Q9HVF5       | 0.82343211 | 20.474287  | Uncharacterized protein                  |
| PiIG | Q9I3U7       | 0.82297904 | 72.1463488 | Probable two-component response reg      |
| PiIG | G3XD63       | 0.81907656 | 153.441014 | Probable methylesterase                  |
| PiIG | Q9I513       | 0.81240588 | 23.7246789 | Phosphoribosylformylglycinamide cyc      |
| PiIG | Q9HVVH0      | 0.80842148 | 2471.26913 | Probable oxidoreductase                  |
| PiIG | Q9I6D5       | 0.79868119 | 52.3422138 | Uncharacterized protein                  |
| PiIG | Q9HY39       | 0.79835541 | 91.8558654 | Transcriptional regulator MetR           |
| PiIG | Q9HXI9       | 0.7823838  | 6.38749814 | Probable iron-binding protein IscU       |
| PiIG | G3XD36       | 0.77242154 | 43.172251  | Phosphoenolpyruvate-protein phospho      |
| PiIG | Q9I0M7       | 0.77198877 | 75.8385471 | Siroheme synthase [Includes: Uroporph    |
| PiIG | Q9HZI5       | 0.77023575 | 62.5397089 | Uncharacterized protein                  |
| PiIG | P07344       | 0.76905965 | 59.1853513 | Tryptophan synthase alpha chain (EC 4.   |
| PiIG | Q9HY55       | 0.730858   | 24.7937924 | Phosphotransferase system transporter    |
| PiIG | Q9HVC9       | 0.72848652 | 38.9131072 | Molybdopterin biosynthesis MoeB prot     |
| PiIG | Q9I405       | 0.7247461  | 18.0027946 | Amino acid ABC transporter ATP bindin    |
| PiIG | Q9I7B0       | 0.72265623 | 99.2148672 | Potassium uptake protein TrkA            |
| PiIG | Q51373       | 0.71457022 | 14.995475  | Response regulator GacA (Global activa   |
| PiIG | Q51382       | 0.71073047 | 8.09575782 | Chaperone protein HscA homolog           |
| PiIG | Q9I1S2       | 0.69942845 | 14.2795746 | Hydrogen cyanide synthase subunit Hcr    |
| PiIG | Q9HVV6       | 0.68907521 | 9.95924195 | Probable ATP-binding component of AB     |
| PiIG | Q9HY14       | 0.68551168 | 10.7791234 | Uncharacterized protein                  |
| PiIG | Q9I446       | 0.6855114  | 10.7791234 | Uncharacterized protein                  |
| PiIG | Q9I6K8       | 0.68551096 | 15.2439824 | Sulfate transport protein CysT           |
| PiIG | Q9HUU6       | 0.68551092 | 7.62199122 | Urease subunit beta (EC 3.5.1.5) (Urea : |
| PiIG | Q9I5A0       | 0.68551048 | 10.7791234 | Probable oxidoreductase                  |
| PiIG | Q9HZM1       | 0.68551047 | 4.44887063 | Probable tolQ-type transport protein     |
| PiIG | Q9HUI2       | 0.6855104  | 7.62199122 | Transcriptional regulatory protein AruR  |
| PiIG | Q9HXT6       | 0.68551039 | 7.62199122 | Uncharacterized protein                  |
| PiIG | Q9I364       | 0.68551036 | 3.66067043 | Uncharacterized protein                  |
| PiIG | Q9I2A1       | 0.68551035 | 7.62199122 | Probable transcriptional regulator       |
| PiIG | Q9HUE0       | 0.68551032 | 7.62199122 | Probable transcriptional regulator       |
| PiIG | Q9I5V7       | 0.68551027 | 7.62199122 | tRNA N6-adenosine threonylcarbamoyl      |

|      |        |            |            |                                           |
|------|--------|------------|------------|-------------------------------------------|
| PiIG | Q9HZM3 | 0.68551026 | 7.62199122 | Tetraacyldisaccharide 4'-kinase (EC 2.7.  |
| PiIG | Q9HY20 | 0.68551026 | 7.62199122 | Uncharacterized protein                   |
| PiIG | Q9HZN7 | 0.68551025 | 3.33621278 | Uncharacterized protein                   |
| PiIG | Q9I6V2 | 0.68551023 | 7.62199122 | Chemotactic transducer for trichloroeth   |
| PiIG | Q9I746 | 0.68551023 | 7.62199122 | Uncharacterized protein                   |
| PiIG | Q9HYK0 | 0.6855102  | 7.62199122 | Probable outer membrane protein           |
| PiIG | G3XCU2 | 0.68551019 | 7.62199122 | Transcriptional regulator ArgR            |
| PiIG | Q9I280 | 0.68551018 | 7.62199122 | Probable decarboxylase                    |
| PiIG | Q51463 | 0.68551017 | 7.62199122 | Flagellar M-ring protein                  |
| PiIG | Q9HX73 | 0.68551017 | 7.62199122 | Uncharacterized protein                   |
| PiIG | Q9I238 | 0.68551015 | 7.62199122 | Uncharacterized protein                   |
| PiIG | Q9I751 | 0.68551013 | 7.62199122 | Fha1                                      |
| PiIG | Q9HTC2 | 0.68551013 | 7.62199122 | Probable coenzyme A transferase           |
| PiIG | Q9HVA7 | 0.68551013 | 7.62199122 | Iron (III)-transport system permease Hii  |
| PiIG | G3XD14 | 0.67847643 | 13.31661   | RNA polymerase-binding transcription f    |
| PiIG | Q9HXR3 | 0.67769377 | 22.9714212 | Uncharacterized protein                   |
| PiIG | Q9HZP9 | 0.67580693 | 19.7924499 | Precorrin-4 C(11)-methyltransferase (EC   |
| PiIG | Q9HVP8 | 0.67574976 | 27.990751  | Dephospho-CoA kinase (EC 2.7.1.24) (D     |
| PiIG | P22008 | 0.66771021 | 21.2314821 | Pyrroline-5-carboxylate reductase (P5C    |
| PiIG | P13982 | 0.66691581 | 10.6818345 | Carbamate kinase (EC 2.7.2.2)             |
| PiIG | Q9HXJ4 | 0.66309695 | 12.9866672 | 4-hydroxy-3-methylbut-2-en-1-yl diph      |
| PiIG | Q9I2F4 | 0.65881715 | 9.97205918 | Phosphofructokinase                       |
| PiIG | Q9I0D5 | 0.65631009 | 8.32316491 | Uncharacterized protein                   |
| PiIG | Q9I2S3 | 0.65605595 | 96.6202958 | Uncharacterized protein                   |
| PiIG | Q9I4Z9 | 0.64598481 | 8.20971855 | Protein SlyX homolog                      |
| PiIG | Q9I5A5 | 0.64487191 | 9.61140501 | Phosphate acetyltransferase (EC 2.3.1.8   |
| PiIG | Q9HXB5 | 0.64415146 | 22.3903703 | Probable transcriptional regulator        |
| PiIG | Q9I0F4 | 0.63988557 | 11.0326955 | Uncharacterized protein                   |
| PiIG | Q9HZA6 | 0.63045828 | 30.2068784 | Motility protein FimV                     |
| PiIG | Q9HUN3 | 0.62517859 | 75.323603  | Replicative DNA helicase                  |
| PiIG | P23747 | 0.62044557 | 4.10255212 | Alginate biosynthesis transcriptional req |
| PiIG | Q9HV13 | 0.61878101 | 6.94365075 | Uncharacterized protein                   |
| PiIG | Q9HV99 | 0.61802009 | 18.0981661 | Uncharacterized protein                   |
| PiIG | Q9I0L2 | 0.61707788 | 4.44887063 | tRNA-specific 2-thiouridylase MnmA (EC    |
| PiIG | Q9I2Z2 | 0.61604612 | 3.12031088 | Uncharacterized protein                   |
| PiIG | Q9HXD3 | 0.6113251  | 4.44887063 | Two-component response regulator Na       |
| PiIG | P15275 | 0.60932026 | 2.7862587  | Transcriptional regulatory protein AlgQ   |
| PiIG | Q9RQ16 | 0.60712528 | 12.2749649 | UPF0301 protein AlgH                      |
| PiIG | Q9I5U4 | 0.60620823 | 19.9529337 | 4-hydroxythreonine-4-phosphate dehyd      |
| PiIG | Q9I3D4 | 0.59185634 | 10.3664445 | Succinate dehydrogenase (B subunit)       |
| PiIG | Q9I4V8 | 0.59007909 | 8.20971855 | Probable transcriptional regulator        |
| PiIG | P34750 | 0.58829498 | 44.9409887 | Fimbrial assembly protein PilQ            |
| PiIG | Q9HU53 | 0.58780665 | 14.3708974 | 2,3-bisphosphoglycerate-independent p     |
| PiIG | Q9HVV1 | 0.58523979 | 8.09575782 | Probable oxidoreductase                   |
| PiIG | Q9I400 | 0.58511853 | 11.0309007 | Probable short-chain dehydrogenase        |

|      |        |            |            |                                               |
|------|--------|------------|------------|-----------------------------------------------|
| PiIG | Q9HXE5 | 0.58510912 | 18.55951   | ATP-dependent RNA helicase RhlB (EC 3.6.1.15) |
| PiIG | Q9HTV1 | 0.58449056 | 10.7124518 | Transcription termination factor Rho (E       |
| PiIG | Q9I495 | 0.58303263 | 17.5099061 | Probable sensor/response regulator hyl        |
| PiIG | Q9I012 | 0.58274503 | 6.48428048 | Uncharacterized protein                       |
| PiIG | Q9I0B2 | 0.58180613 | 21.5059254 | Uncharacterized protein                       |
| PiIG | Q9HZQ2 | 0.58058876 | 9.69647516 | Protein CobW                                  |
| PiIG | Q9HVZ4 | 0.57992927 | 8.08023382 | Protein MraZ                                  |
| PiIG | Q9I1E9 | 0.579915   | 30.5748042 | Probable ATP-binding component of AB          |
| PiIG | Q9HT35 | 0.57322984 | 24.2890443 | GTP cyclohydrolase FolE2 (EC 3.5.4.16)        |
| PiIG | Q9HZI3 | 0.57131189 | 5.51026733 | Probable lipid kinase YegS-like (EC 2.7.1     |
| PiIG | Q9HT76 | 0.56969468 | 16.5538079 | NrdJa                                         |
| PiIG | Q9HVW6 | 0.56502204 | 4.44887063 | Uncharacterized protein                       |
| PiIG | Q9HT22 | 0.56422401 | 4.44887063 | Bifunctional protein GlnU [Includes: Uf       |
| PiIG | Q9I0J4 | 0.56302588 | 14.5160508 | NADH-quinone oxidoreductase subunit           |
| PiIG | Q9HXJ0 | 0.55904233 | 2.97585032 | Probable iron-binding protein IscA            |
| PiIG | Q9HVT2 | 0.55831808 | 3.33621278 | UPF0192 protein PA4489                        |
| PiIG | Q9I524 | 0.55778488 | 11.9962047 | GTP pyrophosphokinase                         |
| PiIG | Q9I6Z8 | 0.55186351 | 6.48428048 | Probable guanine deaminase                    |
| PiIG | Q9HUB8 | 0.55156778 | 4.5850787  | Probable protein kinase UbiB (EC 2.7.-.-      |
| PiIG | Q9HVX5 | 0.54473756 | 8.09575782 | Uncharacterized protein                       |
| PiIG | Q9I2U0 | 0.54351088 | 7.17277725 | ATP-dependent Clp protease ATP-bindin         |
| PiIG | Q9HYU6 | 0.54217095 | 14.3435304 | Probable ATP-dependent helicase               |
| PiIG | Q9HYC8 | 0.5418642  | 7.57212329 | Uncharacterized protein                       |
| PiIG | Q9HWK1 | 0.53552876 | 15.2706616 | Probable acetolactate synthase large su       |
| PiIG | Q9HVQ4 | 0.53436935 | 90.9571517 | Uncharacterized protein                       |
| PiIG | Q9I325 | 0.53008708 | 8.68064398 | Regulatory protein PcrH                       |
| PiIG | Q9HYT2 | 0.52524115 | 34.3498959 | Probable 3-hydroxyisobutyrate dehydr          |
| PiIG | Q9HY41 | 0.52429211 | 8.20844332 | Glycerol kinase 1 (EC 2.7.1.30) (ATP:glyc     |
| PiIG | Q9HXY6 | 0.52287899 | 24.8399866 | UDP-3-O-acylglucosamine N-acyltransfe         |
| PiIG | Q9HW01 | 0.52183514 | 4.78530505 | UDP-N-acetylglucosamine--N-acetylmur          |
| PiIG | Q9HXU4 | 0.51679176 | 4.44887063 | Uncharacterized protein                       |
| PiIG | Q9HUM9 | 0.51563621 | 13.9534729 | 30S ribosomal protein S6                      |
| PiIG | G3XCT6 | 0.51374654 | 3.57947766 | Probable two-component sensor                 |
| PiIG | Q9HT80 | 0.51339726 | 6.88789721 | DNA polymerase I (POL I) (EC 2.7.7.7)         |
| PiIG | Q9HVQ2 | 0.51296143 | 3.3731643  | Probable chemotaxis transducer                |
| PiIG | Q9I383 | 0.5127067  | 7.67487253 | Selenide, water dikinase (EC 2.7.9.3) (Se     |
| PiIG | Q9HT73 | 0.51179938 | 12.9225457 | Zinc import ATP-binding protein ZnuC (I       |
| PiIG | Q9HUD4 | 0.51128275 | 4.92213549 | Uncharacterized protein                       |
| PiIG | Q9I5A8 | 0.51086287 | 11.4968435 | Uncharacterized protein                       |
| PiIG | Q9HTD5 | 0.50775936 | 4.71811737 | Probable transcriptional regulator            |
| PiIG | Q9HVU0 | 0.49692172 | 4.78748919 | Rod shape-determining protein MreB            |
| PiIG | Q9I4Y1 | 0.49375978 | 4.44887063 | Uncharacterized protein                       |
| PiIG | Q9I1W2 | 0.49257785 | 32.8319777 | 1,4-alpha-glucan branching enzyme Glg         |
| PiIG | Q9HV42 | 0.49081996 | 10.0555624 | Protein GrpE (HSP-70 cofactor)                |
| PiIG | P08280 | 0.48171765 | 6.4757254  | Protein RecA (Recombinase A)                  |

|      |        |            |            |                                            |
|------|--------|------------|------------|--------------------------------------------|
| PiIG | Q9HXZ4 | 0.47863369 | 3.24323395 | CTP synthase (EC 6.3.4.2) (CTP syntheta    |
| PiIG | Q9HZ68 | 0.47792003 | 5.84249194 | Histidinol-phosphate aminotransferase      |
| PiIG | Q9HT39 | 0.47764434 | 22.0422655 | Uncharacterized protein                    |
| PiIG | Q9HTU9 | 0.47602888 | 7.6849198  | Uncharacterized protein                    |
| PiIG | G3XDA1 | 0.47394998 | 38.0803572 | Exoenzyme S                                |
| PiIG | G3XCV0 | 0.47210708 | 4.59302294 | Transcriptional regulator FleQ             |
| PiIG | P30718 | 0.47067436 | 34.1289584 | 60 kDa chaperonin (GroEL protein) (Pro     |
| PiIG | Q9K3C5 | 0.46955805 | 5.08342894 | B-type flagellar hook-associated proteir   |
| PiIG | Q9I4W4 | 0.46809269 | 11.1303157 | Uncharacterized protein                    |
| PiIG | Q9I179 | 0.46802176 | 23.6568396 | Probable non-ribosomal peptide synthe      |
| PiIG | Q9HXZ1 | 0.46662215 | 12.5183323 | DNA polymerase III subunit alpha (EC 2.    |
| PiIG | Q9HV43 | 0.46461929 | 25.84745   | Chaperone protein DnaK (HSP70) (Heat       |
| PiIG | Q9HXP1 | 0.4641752  | 7.70566996 | Uncharacterized protein                    |
| PiIG | Q9HZT5 | 0.46350424 | 4.71811737 | Probable ATP-binding component of AB       |
| PiIG | Q9I689 | 0.46289417 | 21.4235091 | ATP-dependent RNA helicase RhlE (EC 3      |
| PiIG | P47204 | 0.46287069 | 5.13637249 | Cell division protein FtsZ                 |
| PiIG | Q9I5Q6 | 0.46092645 | 4.55628412 | Iron-sulfur cluster insertion protein Erp. |
| PiIG | Q9HW21 | 0.46069207 | 3.21729442 | Probable two-component response reg        |
| PiIG | Q9IOV0 | 0.46069198 | 4.44887063 | Probable transcriptional regulator         |
| PiIG | Q9HXE4 | 0.46069198 | 4.44887063 | NAD(P)H-dependent anabolic L-arginine      |
| PiIG | Q9I6I9 | 0.46023542 | 4.94087877 | Polyamine transport protein PotG           |
| PiIG | P15276 | 0.46006345 | 7.99005196 | Transcriptional regulatory protein AlgP    |
| PiIG | Q9I003 | 0.45927916 | 20.4839278 | ATP-dependent RNA helicase DeaD (EC        |
| PiIG | P57112 | 0.45925985 | 7.46156038 | Soluble pyridine nucleotide transhydrog    |
| PiIG | Q9I3C5 | 0.459043   | 10.8049748 | Chaperone protein HtpG (Heat shock pr      |
| PiIG | Q9HT77 | 0.45828172 | 6.61898993 | NrdJb                                      |
| PiIG | Q51422 | 0.4531545  | 2.56259958 | Aspartate--tRNA ligase (EC 6.1.1.12) (As   |
| PiIG | Q9HUX5 | 0.45266218 | 9.92675428 | Uncharacterized protein                    |
| PiIG | Q9HZM8 | 0.45264361 | 9.11121196 | Ribonuclease E (RNase E) (EC 3.1.26.12)    |
| PiIG | Q9HZK4 | 0.45082506 | 3.48205474 | Probable glyceraldehyde-3-phosphate c      |
| PiIG | Q9I5F6 | 0.45068447 | 6.42593119 | Proline dehydrogenase PutA                 |
| PiIG | Q9HVS8 | 0.45057018 | 2.42971869 | RoxR                                       |
| PiIG | Q9I5P0 | 0.44859318 | 4.5850787  | Probable type II secretion system prote    |
| PiIG | Q9I2V5 | 0.44725161 | 6.82296069 | Aconitate hydratase 2 (Aconitase 2) (EC    |
| PiIG | Q9I239 | 0.44652223 | 9.38630862 | Probable transcriptional regulator         |
| PiIG | P48372 | 0.44521876 | 6.63891856 | DNA gyrase subunit A (EC 5.99.1.3)         |
| PiIG | Q9I5H1 | 0.44362923 | 6.86252263 | Uncharacterized protein                    |
| PiIG | G3XD93 | 0.44333976 | 13.388187  | Probable chaperone                         |
| PiIG | Q51466 | 0.44212118 | 5.91617964 | Flagellar motor switch protein FliN        |
| PiIG | G3XD61 | 0.44128517 | 4.50776052 | UDP-2,3-diacetamido-2,3-dideoxy-D-glu      |
| PiIG | Q9I4L9 | 0.44104356 | 4.44887063 | Uncharacterized protein                    |
| PiIG | Q9I6A1 | 0.43995692 | 8.62743894 | Cystathionine beta-synthase                |
| PiIG | Q9HX38 | 0.43809606 | 17.7698173 | Uncharacterized protein                    |
| PiIG | Q9HT12 | 0.43662766 | 15.7039676 | Chromosome partitioning protein Spo0.      |
| PiIG | Q9LCT3 | 0.43620776 | 5.34591409 | Protein translocase subunit SecA           |

|      |        |            |            |                                             |
|------|--------|------------|------------|---------------------------------------------|
| PiIG | Q9I181 | 0.43564134 | 36.0976536 | PvdJ                                        |
| PiIG | Q9I7C2 | 0.43510652 | 2.64296591 | DNA gyrase subunit B (EC 5.99.1.3)          |
| PiIG | Q9I1F5 | 0.43418264 | 9.1552543  | Probable glyceraldehyde-3-phosphate c       |
| PiIG | Q9I323 | 0.43346716 | 16.5118922 | Translocator outer membrane protein F       |
| PiIG | P09591 | 0.43251226 | 6.20839855 | Elongation factor Tu (EF-Tu)                |
| PiIG | Q9HWW7 | 0.43023697 | 18.6737066 | Probable thioredoxin                        |
| PiIG | P38100 | 0.42833574 | 5.39185453 | Carbamoyl-phosphate synthase large ct       |
| PiIG | Q9I0J6 | 0.42828254 | 3.63524536 | NADH-quinone oxidoreductase subunit         |
| PiIG | Q9HYG4 | 0.42684135 | 9.08905892 | Aliphatic sulfonates import ATP-binding     |
| PiIG | Q9I403 | 0.42629412 | 3.21729442 | Amino acid ABC transporter membrane         |
| PiIG | P52024 | 0.42593596 | 3.21729442 | DNA polymerase III subunit delta' (EC 2.    |
| PiIG | O50274 | 0.42462522 | 6.98104741 | Bifunctional enzyme CysN/CysC [Includ       |
| PiIG | Q9I762 | 0.42373042 | 6.30567143 | Uncharacterized protein                     |
| PiIG | Q9HWW1 | 0.42356394 | 5.5802973  | Outer membrane protein OprG                 |
| PiIG | Q9I0K0 | 0.42351173 | 3.57543165 | NADH-quinone oxidoreductase subunit         |
| PiIG | Q9I157 | 0.42209996 | 28.6396372 | PvdL                                        |
| PiIG | Q9HVU7 | 0.42163195 | 2.20169366 | Uncharacterized protein                     |
| PiIG | Q9I2U2 | 0.42109325 | 8.30889935 | Trigger factor (TF) (EC 5.2.1.8) (PPlase)   |
| PiIG | Q9HV59 | 0.41946529 | 9.81401559 | Polyribonucleotide nucleotidyltransfera     |
| PiIG | Q9HTZ7 | 0.41924014 | 13.4819876 | Phosphoenolpyruvate carboxykinase [A        |
| PiIG | Q9HXC2 | 0.41881216 | 27.5109263 | Probable ATP-binding component of AE        |
| PiIG | Q9HVC5 | 0.41772584 | 5.07234143 | Ribose-phosphate pyrophosphokinase (        |
| PiIG | Q9HWC7 | 0.4172971  | 2.70970433 | 50S ribosomal protein L10                   |
| PiIG | Q9I2A0 | 0.41716918 | 17.9064941 | 3-hydroxy-3-methylglutaryl-CoA lyase        |
| PiIG | G3XD17 | 0.41682292 | 5.97574764 | Thiol:disulfide interchange protein DsbI    |
| PiIG | Q9HW15 | 0.41678875 | 2.23053521 | Probable short-chain dehydrogenase          |
| PiIG | Q9I3D5 | 0.41616448 | 2.61796551 | Succinate dehydrogenase (A subunit)         |
| PiIG | Q9HTW7 | 0.41465865 | 4.75668749 | UbiH protein                                |
| PiIG | Q9HUT4 | 0.41447944 | 6.06154651 | Uncharacterized protein                     |
| PiIG | Q9I278 | 0.41328462 | 4.44887063 | Uncharacterized protein                     |
| PiIG | Q9I022 | 0.41002479 | 4.84242558 | Probable glutathione S-transferase          |
| PiIG | Q9HZM9 | 0.40981588 | 11.1907226 | Ribosomal large subunit pseudouridine       |
| PiIG | Q9I182 | 0.40923967 | 20.6256856 | Pyoverdine synthetase D                     |
| PiIG | Q9HWP6 | 0.40881553 | 11.6102953 | Probable transcriptional regulator          |
| PiIG | Q9HYZ5 | 0.40696    | 6.89620385 | Cell division topological specificity factc |
| PiIG | Q9I4Q5 | 0.40682833 | 5.59740513 | Uncharacterized protein                     |
| PiIG | Q9HV53 | 0.40574454 | 3.85277931 | Ribosome maturation factor RimP             |
| PiIG | Q9HT19 | 0.40497547 | 1.44244081 | ATP synthase gamma chain (ATP syntha        |
| PiIG | Q9HTZ9 | 0.40465468 | 5.59072296 | Probable nitroreductase                     |
| PiIG | Q9HV96 | 0.40450367 | 11.1365789 | Uncharacterized protein                     |
| PiIG | G3XD23 | 0.40428652 | 3.90097364 | UDP-N-acetyl-2-amino-2-deoxy-D-glucu        |
| PiIG | Q9I0A7 | 0.40124167 | 10.8195884 | Probable restriction-modification syste     |
| PiIG | Q9I0J7 | 0.40099259 | 4.53421893 | NADH-quinone oxidoreductase subunit         |
| PiIG | Q9HZG8 | 0.40093035 | 3.94999118 | Uncharacterized protein                     |
| PiIG | Q9HWC6 | 0.40033454 | 8.65826517 | 50S ribosomal protein L1                    |

|      |        |            |            |                                            |
|------|--------|------------|------------|--------------------------------------------|
| PiIG | Q9HVC4 | 0.40030231 | 3.25941846 | 50S ribosomal protein L25 (General stre    |
| PiIG | Q9I1V0 | 0.39926339 | 11.0833408 | Glycogen synthase (EC 2.4.1.21) (Starch    |
| PiIG | Q9I2T9 | 0.39887231 | 6.66273779 | Lon protease (EC 3.4.21.53) (ATP-deper     |
| PiIG | Q9HZA7 | 0.39802895 | 2.78908024 | Acetyl-coenzyme A carboxylase carboxy      |
| PiIG | Q9HY77 | 0.39774542 | 1.77667556 | Glutaredoxin                               |
| PiIG | Q9HXR1 | 0.39658006 | 15.0779675 | Uncharacterized protein                    |
| PiIG | P37799 | 0.39612222 | 4.13576481 | Biotin carboxyl carrier protein of acetyl- |
| PiIG | Q9I6B4 | 0.39470889 | 3.72374231 | Thiazole synthase (EC 2.8.1.10)            |
| PiIG | Q9HZ71 | 0.39203281 | 2.62569261 | 30S ribosomal protein S1                   |
| PiIG | Q9I0L8 | 0.39194766 | 3.83945686 | ATP-binding protease component ClpA        |
| PiIG | Q9HYE0 | 0.39056175 | 11.666044  | Probable ATP-dependent RNA helicase        |
| PiIG | Q9HX16 | 0.38799372 | 4.82594163 | Uncharacterized protein                    |
| PiIG | Q9I0A0 | 0.38743065 | 3.02424168 | Translation initiation factor IF-3         |
| PiIG | Q9I0Z9 | 0.38668435 | 1.76240797 | Uncharacterized protein                    |
| PiIG | Q9I1V4 | 0.38613621 | 6.24911552 | Uncharacterized protein                    |
| PiIG | Q9HWF0 | 0.38475178 | 3.59750601 | 50S ribosomal protein L6                   |
| PiIG | Q9HUD0 | 0.38460432 | 1.10114806 | 50S ribosomal protein L31                  |
| PiIG | Q9HYT5 | 0.38433195 | 4.54471286 | Universal stress protein                   |
| PiIG | Q9I3I1 | 0.38428137 | 11.1232972 | DNA polymerase subunits gamma and t        |
| PiIG | Q9HVV2 | 0.38424332 | 2.69570399 | 50S ribosomal protein L13                  |
| PiIG | Q9HWC8 | 0.38424094 | 4.96543975 | 50S ribosomal protein L7/L12               |
| PiIG | Q9HWC5 | 0.38409281 | 2.1529275  | 50S ribosomal protein L11                  |
| PiIG | Q9HV40 | 0.38389613 | 5.37739678 | SsrA-binding protein                       |
| PiIG | Q9HUK1 | 0.38247825 | 3.87598091 | DNA topoisomerase 4 subunit A (EC 5.9      |
| PiIG | Q9I5Q7 | 0.38187736 | 2.53711185 | Uncharacterized protein                    |
| PiIG | Q9I291 | 0.38163822 | 3.21274722 | UTP--glucose-1-phosphate uridylyltrans     |
| PiIG | P65116 | 0.38156887 | 7.53914836 | Translation initiation factor IF-1         |
| PiIG | Q9HXJ8 | 0.38022932 | 3.38251858 | GTPase Der (GTP-binding protein EngA)      |
| PiIG | Q9HX76 | 0.37972464 | 5.18856308 | Probable DNA binding protein               |
| PiIG | Q9HVN5 | 0.37865695 | 6.89477272 | Chaperone protein ClpB                     |
| PiIG | Q9I6D9 | 0.3779004  | 9.64499379 | Uncharacterized protein                    |
| PiIG | Q9HVV7 | 0.37650915 | 2.06407013 | UDP-N-acetylglucosamine 1-carboxyvin       |
| PiIG | Q9HY25 | 0.37548393 | 3.97997722 | 50S ribosomal protein L31 type B           |
| PiIG | Q9HWE7 | 0.37476507 | 1.64119887 | 50S ribosomal protein L5                   |
| PiIG | Q9HWD2 | 0.37455595 | 3.22448862 | Elongation factor G 1 (EF-G 1)             |
| PiIG | P05384 | 0.37451737 | 7.61068668 | DNA-binding protein HU-beta                |
| PiIG | Q9HVV4 | 0.37420657 | 0.4082862  | Ubiquinol-cytochrome c reductase iron-     |
| PiIG | Q9HUU1 | 0.3739482  | 11.0244277 | Oxaloacetate decarboxylase (EC 4.1.1.3     |
| PiIG | Q9HUC5 | 0.37188841 | 5.18097591 | ATP-dependent protease ATPase subun        |
| PiIG | Q9HUM7 | 0.37089907 | 8.34948488 | Ribonuclease R (RNase R) (EC 3.1.13.1)     |
| PiIG | Q9HWE0 | 0.3707914  | 1.264735   | 50S ribosomal protein L22                  |
| PiIG | Q9I4W9 | 0.36950221 | 3.33621278 | Quinolate synthase A (EC 2.5.1.72)         |
| PiIG | Q9HUC3 | 0.36931328 | 1.00457501 | Polyhydroxyalkanoate synthesis proteir     |
| PiIG | Q9HZ55 | 0.3687225  | 3.05625711 | Ribosomal large subunit pseudouridine      |
| PiIG | Q51561 | 0.36868467 | 7.31635296 | DNA-directed RNA polymerase subunit        |

|      |        |            |            |                                           |
|------|--------|------------|------------|-------------------------------------------|
| PiIG | Q9I4K8 | 0.3676529  | 16.6001401 | Probable oxidoreductase                   |
| PiIG | Q9HWF8 | 0.36713916 | 0.53404105 | 30S ribosomal protein S11                 |
| PiIG | Q9HTQ3 | 0.36656158 | 5.54406053 | Probable transcriptional regulator        |
| PiIG | Q9HWD6 | 0.36638342 | 3.76314782 | 50S ribosomal protein L4                  |
| PiIG | Q9HWE5 | 0.36584946 | 0.62229596 | 50S ribosomal protein L14                 |
| PiIG | O68822 | 0.36535254 | 7.68518513 | Cytosol aminopeptidase (EC 3.4.11.1) (L   |
| PiIG | Q9HW72 | 0.36449823 | 8.05234589 | Pyruvate kinase (EC 2.7.1.40)             |
| PiIG | Q9I3D2 | 0.36432026 | 2.65490727 | Dihydrolipoyllysine-residue succinyltrar  |
| PiIG | Q9I0A2 | 0.3639347  | 0.67349756 | 50S ribosomal protein L20                 |
| PiIG | Q9HU56 | 0.36306755 | 2.01511949 | Protein-export protein SecB               |
| PiIG | Q59637 | 0.36286306 | 4.32593904 | Pyruvate dehydrogenase E1 componen        |
| PiIG | Q9HWD4 | 0.36273549 | 0.6123171  | 30S ribosomal protein S10                 |
| PiIG | Q9HWE3 | 0.36214155 | 1.84369678 | 50S ribosomal protein L29                 |
| PiIG | Q9HWF7 | 0.35861621 | 0.70956175 | 30S ribosomal protein S13                 |
| PiIG | Q9I4H3 | 0.35845467 | 3.21729442 | Uncharacterized protein                   |
| PiIG | Q9I0G3 | 0.35718978 | 4.39155033 | Probable type II secretion system prote   |
| PiIG | Q9I4F5 | 0.35709082 | 7.76323754 | C4-dicarboxylate transport protein 2      |
| PiIG | Q9HUN2 | 0.35697965 | 4.86819241 | 50S ribosomal protein L9                  |
| PiIG | Q9HYC7 | 0.35626648 | 4.65213645 | Methionine--tRNA ligase (EC 6.1.1.10) (I  |
| PiIG | Q9HVL2 | 0.35526901 | 6.357882   | Peptidyl-prolyl cis-trans isomerase (EC 5 |
| PiIG | Q9HWE4 | 0.35490764 | 0.86171631 | 30S ribosomal protein S17                 |
| PiIG | Q9HX15 | 0.35454938 | 3.21729442 | Uncharacterized protein                   |
| PiIG | Q9HWC9 | 0.35215582 | 3.78020176 | DNA-directed RNA polymerase subunit       |
| PiIG | Q9HVA1 | 0.35211369 | 6.13200106 | Acetolactate synthase isozyme III small   |
| PiIG | Q9HWE2 | 0.35155354 | 0.30036213 | 50S ribosomal protein L16                 |
| PiIG | Q9HUJ8 | 0.35128824 | 7.58859881 | DNA topoisomerase 4 subunit B (EC 5.9     |
| PiIG | P72131 | 0.35104483 | 5.36375254 | HTH-type transcriptional regulator PtxR   |
| PiIG | Q9HY81 | 0.35003727 | 1.5614082  | Probable peroxidase                       |
| PiIG | Q9HWZ6 | 0.35002724 | 3.48833584 | Inorganic pyrophosphatase (EC 3.6.1.1)    |
| PiIG | Q9HVM1 | 0.34999221 | 0.41561019 | 30S ribosomal protein S20                 |
| PiIG | Q9HUD3 | 0.34997396 | 2.55360911 | Malic enzyme                              |
| PiIG | Q9HWD1 | 0.34970993 | 1.14720312 | 30S ribosomal protein S7                  |
| PiIG | Q9HUM8 | 0.34917708 | 3.6824269  | 23S rRNA (guanosine-2'-O-)-methyltran     |
| PiIG | Q9I749 | 0.34868369 | 2.98399943 | Uncharacterized protein                   |
| PiIG | Q9I0J9 | 0.34851728 | 5.15309184 | NADH-quinone oxidoreductase subunit       |
| PiIG | Q9HWF1 | 0.34837638 | 0.4772659  | 50S ribosomal protein L18                 |
| PiIG | P96963 | 0.34749381 | 33.5579911 | DNA repair protein RadA homolog (DN/      |
| PiIG | Q9I3D3 | 0.34742973 | 6.11048934 | 2-oxoglutarate dehydrogenase (E1 subu     |
| PiIG | O54438 | 0.34729823 | 4.74402742 | 3-oxoacyl-[acyl-carrier-protein] reducta  |
| PiIG | Q9HVV3 | 0.34698767 | 0.42771487 | 30S ribosomal protein S9                  |
| PiIG | O54439 | 0.34587813 | 0.51419938 | Acyl carrier protein 1 (ACP 1)            |
| PiIG | O30506 | 0.34573535 | 2.25245857 | Arginine/ornithine transport ATP-bindir   |
| PiIG | Q9I6H5 | 0.34544341 | 3.64533126 | D-3-phosphoglycerate dehydrogenase        |
| PiIG | Q9I6Z3 | 0.34473707 | 1.52021043 | Alkyl hydroperoxide reductase subunit     |
| PiIG | P30720 | 0.34413814 | 1.56061581 | 10 kDa chaperonin (GroES protein) (Pro    |

|      |        |            |            |                                               |
|------|--------|------------|------------|-----------------------------------------------|
| PiIG | Q9HWG0 | 0.34322183 | 5.82033573 | UvrABC system protein A (UvrA protein         |
| PiIG | Q9HUM2 | 0.34250304 | 4.35594233 | Protease subunit HflK                         |
| PiIG | Q9HVD1 | 0.34225841 | 4.66450427 | Lipid A deacylase PagL (EC 3.1.1.77) (LP:     |
| PiIG | P72151 | 0.34224988 | 4.39544164 | B-type flagellin                              |
| PiIG | Q9HXP9 | 0.34188154 | 0.68215231 | 30S ribosomal protein S16                     |
| PiIG | Q9I0Z1 | 0.34140694 | 2.38296685 | Probable oxidoreductase                       |
| PiIG | Q59638 | 0.34135291 | 4.21270659 | Dihydrolipoyllysine-residue acetyltransl      |
| PiIG | Q9HZ98 | 0.34019674 | 5.537958   | Heat-shock protein IbpA                       |
| PiIG | Q9HUT5 | 0.3401809  | 10.2981482 | Probable transcriptional regulator            |
| PiIG | Q9HXF7 | 0.33994049 | 3.82441487 | Nucleoid-associated protein PA3849            |
| PiIG | Q9HXT4 | 0.33990317 | 4.44887063 | Uncharacterized protein                       |
| PiIG | Q9HUJ2 | 0.33981492 | 3.92420654 | Phosphomethylpyrimidine synthase (EC          |
| PiIG | Q9HZ97 | 0.33932008 | 11.8279682 | Uncharacterized protein                       |
| PiIG | Q9HWF3 | 0.33875088 | 0.21565409 | 50S ribosomal protein L30                     |
| PiIG | Q9HWE9 | 0.33837416 | 4.00481341 | 30S ribosomal protein S8                      |
| PiIG | Q9HZP0 | 0.33829716 | 4.5850787  | Uncharacterized protein                       |
| PiIG | G3XD20 | 0.33772224 | 3.44143506 | Serine protease MucD                          |
| PiIG | G3XD12 | 0.33754822 | 3.97919086 | Hydrogen cyanide synthase subunit Hcr         |
| PiIG | Q9I4F9 | 0.33751977 | 3.52434581 | Two-component response regulator Ph           |
| PiIG | Q51472 | 0.33700202 | 4.84165934 | Integration host factor subunit alpha (Ih     |
| PiIG | P33642 | 0.33547714 | 15.281475  | Probable D-amino acid oxidase PA4548          |
| PiIG | Q9HT20 | 0.3344876  | 1.95642513 | ATP synthase subunit beta (EC 3.6.3.14)       |
| PiIG | Q9HWF2 | 0.33441432 | 0.71864132 | 30S ribosomal protein S5                      |
| PiIG | Q9HTQ4 | 0.33419311 | 1.6853726  | Cytochrome c5                                 |
| PiIG | O82850 | 0.33343247 | 1.25220596 | 30S ribosomal protein S2                      |
| PiIG | Q9HXK2 | 0.33317741 | 8.02742175 | Probable oxidoreductase                       |
| PiIG | Q51567 | 0.33293574 | 2.04928099 | Succinyl-CoA ligase [ADP-forming] subu        |
| PiIG | Q9HVL6 | 0.33263593 | 2.25768967 | 50S ribosomal protein L21                     |
| PiIG | P48247 | 0.33210476 | 1.8616468  | Glutamate-1-semialdehyde 2,1-aminorr          |
| PiIG | Q9HXQ2 | 0.33205978 | 0.76362336 | 50S ribosomal protein L19                     |
| PiIG | Q9HWE1 | 0.3320344  | 0.49966804 | 30S ribosomal protein S3                      |
| PiIG | Q9I5Z0 | 0.33125071 | 2.98574723 | S-adenosylmethionine synthase (AdoM           |
| PiIG | Q9HT17 | 0.33118098 | 1.36565935 | ATP synthase subunit delta (ATP syntha        |
| PiIG | P47203 | 0.3302693  | 4.70036311 | Cell division protein FtsA                    |
| PiIG | Q9I0K4 | 0.32941955 | 3.07994213 | Isocitrate lyase (ICL) (Isocitrase) (Isocitr: |
| PiIG | Q9HWF4 | 0.32877326 | 0.26972166 | 50S ribosomal protein L15                     |
| PiIG | Q9HU38 | 0.32784706 | 4.19494622 | Uncharacterized protein                       |
| PiIG | Q9I2U9 | 0.3273439  | 1.94260312 | Peptidyl-prolyl cis-trans isomerase (EC 5     |
| PiIG | Q9I692 | 0.32727533 | 3.42825254 | Uncharacterized protein                       |
| PiIG | Q9HV58 | 0.32707598 | 1.43422939 | 30S ribosomal protein S15                     |
| PiIG | Q9I2U6 | 0.32684857 | 41.597673  | Bifunctional protein FofD [Includes: Me       |
| PiIG | Q9I2X1 | 0.32663773 | 6.3630255  | Uncharacterized protein                       |
| PiIG | Q9HX60 | 0.32642064 | 1.57187479 | Uncharacterized protein                       |
| PiIG | P04739 | 0.32601528 | 2.28548554 | Fimbrial protein (Pilin) (Strain PAO)         |
| PiIG | G3XCY4 | 0.32525108 | 4.79611304 | Alginate and motility regulator Z             |



|      |        |            |            |                                          |
|------|--------|------------|------------|------------------------------------------|
| PiIG | Q9HWD9 | 0.32425273 | 0.44006906 | 30S ribosomal protein S19                |
| PiIG | Q9HV44 | 0.32225762 | 4.93835768 | Chaperone protein DnaJ                   |
| PiIG | Q9HUN0 | 0.32182882 | 1.78259889 | 30S ribosomal protein S18                |
| PiIG | Q9HV01 | 0.32164856 | 12.293094  | L-seryl-tRNA(Sec) selenium transferase   |
| PiIG | P53593 | 0.32126503 | 2.39820476 | Succinyl-CoA ligase [ADP-forming] subu   |
| PiIG | Q9HYR9 | 0.32068641 | 2.76980766 | ATP-dependent Clp protease proteolyti    |
| PiIG | Q9I4Z4 | 0.32031797 | 0.32958759 | Peptidoglycan-associated lipoprotein     |
| PiIG | Q9HWE8 | 0.31884398 | 2.18367957 | 30S ribosomal protein S14                |
| PiIG | O52760 | 0.31827608 | 10.110317  | DNA-directed RNA polymerase subunit      |
| PiIG | Q9I3N0 | 0.31814078 | 4.44887063 | Cytochrome c-type biogenesis protein C   |
| PiIG | Q9I2T8 | 0.31670163 | 7.25022206 | Peptidyl-prolyl cis-trans isomerase D    |
| PiIG | P55222 | 0.3157161  | 3.27747148 | Cyclic AMP receptor-like protein         |
| PiIG | Q9HW86 | 0.31560099 | 4.87869251 | MvaT (Transcriptional regulator MvaT, I  |
| PiIG | Q9I685 | 0.31464034 | 4.29583134 | Adenosylhomocysteinase (EC 3.3.1.1) (S   |
| PiIG | Q9HWD8 | 0.31352661 | 8.98574378 | 50S ribosomal protein L2                 |
| PiIG | Q9I0M2 | 0.31239988 | 3.01546976 | Thioredoxin reductase (EC 1.8.1.9)       |
| PiIG | O52759 | 0.3103844  | 0.7255428  | 30S ribosomal protein S4                 |
| PiIG | P11221 | 0.30995482 | 0.77972324 | Major outer membrane lipoprotein (Ou     |
| PiIG | Q9HWD5 | 0.30971058 | 1.03742264 | 50S ribosomal protein L3                 |
| PiIG | Q9HYZ0 | 0.30949375 | 4.5850787  | Uncharacterized protein                  |
| PiIG | Q03456 | 0.30930507 | 1.8885993  | Ferric uptake regulation protein (Ferric |
| PiIG | Q9I3D1 | 0.30704485 | 3.46551151 | Dihydrolipoyl dehydrogenase (EC 1.8.1.   |
| PiIG | Q9HUF1 | 0.3069318  | 3.43351549 | Peptide methionine sulfoxide reductase   |
| PiIG | P57703 | 0.30672258 | 5.57070279 | 5-methyltetrahydropteroyltriglutamate    |
| PiIG | Q9I2W9 | 0.30646491 | 4.05217261 | Phosphoenolpyruvate synthase (PEP sy     |
| PiIG | Q9HXU8 | 0.30638141 | 3.04042594 | Lipotoxon F, LptF                        |
| PiIG | Q9HWW4 | 0.30589636 | 4.4320263  | Probable ATP-binding component of AB     |
| PiIG | Q9I7B7 | 0.30430071 | 4.26995225 | Glycine--tRNA ligase alpha subunit (EC C |
| PiIG | Q9HVA0 | 0.30375683 | 4.28127058 | Acetolactate synthase large subunit      |
| PiIG | Q9HWI1 | 0.30308985 | 6.48428048 | Uncharacterized protein                  |
| PiIG | Q9HT18 | 0.3015563  | 1.15267676 | ATP synthase subunit alpha (EC 3.6.3.14  |
| PiIG | Q9I690 | 0.29967471 | 0.70811723 | UPF0312 protein PA0423                   |
| PiIG | O52761 | 0.29946822 | 2.19468111 | 50S ribosomal protein L17                |
| PiIG | Q9HXU9 | 0.29873526 | 2.36360691 | Uncharacterized protein                  |
| PiIG | Q9HWD7 | 0.29862288 | 0.31713229 | 50S ribosomal protein L23                |
| PiIG | P13794 | 0.29822177 | 2.108345   | Outer membrane porin F                   |
| PiIG | Q9I0H1 | 0.29660549 | 2.56035456 | Uncharacterized protein                  |
| PiIG | Q9HTN8 | 0.29648616 | 4.74651151 | 50S ribosomal protein L28                |
| PiIG | Q9I553 | 0.29645518 | 5.5635442  | Alanine--tRNA ligase (EC 6.1.1.7) (Alany |
| PiIG | Q9HVV1 | 0.29595095 | 4.30477844 | Probable ATP-binding component of AB     |
| PiIG | Q9I788 | 0.2955694  | 10.8533112 | Exoenzyme T                              |
| PiIG | Q9I5F9 | 0.29470997 | 3.47194017 | Lon protease (EC 3.4.21.53) (ATP-deper   |
| PiIG | Q9HV73 | 0.29459224 | 6.04465887 | Two-component response regulator Cb      |
| PiIG | Q9I659 | 0.2944795  | 2.48686043 | Probable ClpA/B protease ATP binding c   |
| PiIG | Q9I6X4 | 0.29340308 | 6.29792373 | Probable Resistance-Nodulation-Cell Di   |

|      |        |            |            |                                                   |
|------|--------|------------|------------|---------------------------------------------------|
| PiIG | Q9HV97 | 0.29257297 | 2.63508079 | Uncharacterized protein                           |
| PiIG | Q9HZN4 | 0.29220547 | 0.57871996 | 50S ribosomal protein L32                         |
| PiIG | Q9HXT9 | 0.29146551 | 4.91091249 | Probable two-component response reg               |
| PiIG | G3XD11 | 0.29130849 | 5.00832715 | PhoP/Q and low Mg <sup>2+</sup> inducible outer r |
| PiIG | Q9I3B2 | 0.29079653 | 1.77652967 | Beta-ketoacyl-ACP synthase I                      |
| PiIG | Q9HYG2 | 0.29059599 | 4.37395605 | Alkanesulfonate monooxygenase (EC 1.              |
| PiIG | Q9I5Y1 | 0.29047814 | 2.81388962 | Fructose-bisphosphate aldolase (FBP ali           |
| PiIG | P23189 | 0.28946215 | 3.79320685 | Glutathione reductase (GR) (GRase) (EC            |
| PiIG | O82851 | 0.288968   | 3.09850445 | Elongation factor Ts (EF-Ts)                      |
| PiIG | G3XD01 | 0.28879885 | 1.98809068 | UDP-2-acetamido-3-amino-2,3-dideoxy               |
| PiIG | Q9I317 | 0.28862545 | 2.09560262 | Type III export protein PscE (Pseudomo            |
| PiIG | Q9HUC8 | 0.2856222  | 5.90408563 | Arginine--tRNA ligase (EC 6.1.1.19) (Arg          |
| PiIG | Q9I3F5 | 0.2853438  | 3.78589981 | Aconitate hydratase 1 (Aconitase 1) (EC           |
| PiIG | Q9HTT7 | 0.28449209 | 4.80810864 | Uncharacterized protein                           |
| PiIG | Q9HT21 | 0.28378223 | 1.27990898 | ATP synthase epsilon chain (ATP syntha            |
| PiIG | Q9HX85 | 0.28362008 | 9.12001073 | Uncharacterized protein                           |
| PiIG | P26276 | 0.28330774 | 2.62902235 | Phosphomannomutase/phosphoglucon                  |
| PiIG | Q9HTP6 | 0.28326629 | 2.68278727 | Leucine-responsive regulatory protein             |
| PiIG | P40947 | 0.28224942 | 1.53128457 | Single-stranded DNA-binding protein (S            |
| PiIG | Q9HWW2 | 0.28173751 | 4.57026215 | Uncharacterized protein                           |
| PiIG | Q9HVJ1 | 0.28159289 | 2.46517601 | Probable ATP-binding component of AB              |
| PiIG | Q9HTY9 | 0.28146797 | 2.79426185 | AmgR                                              |
| PiIG | Q9HX51 | 0.28119189 | 2.70499256 | Probable transcriptional regulator                |
| PiIG | P13981 | 0.2810154  | 3.55236746 | Arginine deiminase (ADI) (EC 3.5.3.6) (A          |
| PiIG | G3XD28 | 0.28069682 | 6.07099458 | Type 4 fimbrial biogenesis protein PilM           |
| PiIG | Q9I4Z7 | 0.27888916 | 3.12872719 | Probable dna-binding stress protein               |
| PiIG | Q9HZX5 | 0.27877618 | 8.50358757 | Uncharacterized protein                           |
| PiIG | P29365 | 0.27728898 | 3.47423983 | Homoserine dehydrogenase (HDH) (EC                |
| PiIG | Q9HXY0 | 0.27715596 | 3.59920153 | Probable aminotransferase                         |
| PiIG | Q9HV55 | 0.27715268 | 4.72122596 | Translation initiation factor IF-2                |
| PiIG | Q9X2T1 | 0.27639904 | 2.4964604  | Thioredoxin (Trx)                                 |
| PiIG | Q9I5X4 | 0.27589056 | 4.72455591 | Probable hydrolase                                |
| PiIG | O33877 | 0.27341546 | 2.13374742 | 3-hydroxydecanoyl-[acyl-carrier-proteir           |
| PiIG | Q9HWH2 | 0.27315232 | 2.6103355  | Probable phenazine-specific methyltrar            |
| PiIG | Q9HW73 | 0.27226143 | 3.57465666 | Uncharacterized protein                           |
| PiIG | Q9HUE2 | 0.27222371 | 4.33939857 | Uncharacterized protein                           |
| PiIG | Q9HVL8 | 0.27103137 | 2.17793859 | GTPase Obg (GTP-binding protein Obg)              |
| PiIG | Q51551 | 0.2710059  | 2.39084471 | Dihydroorotase-like protein (Aspartate            |
| PiIG | O68823 | 0.27019875 | 3.21729442 | DNA polymerase III subunit chi (EC 2.7.:          |
| PiIG | Q9HW49 | 0.26989045 | 3.0241391  | Uncharacterized protein                           |
| PiIG | Q9HUM6 | 0.26958499 | 2.03027158 | Adenylosuccinate synthetase (AMPSase              |
| PiIG | Q9I4I1 | 0.2691906  | 5.12932626 | Ribonucleoside-diphosphate reductase              |
| PiIG | O50273 | 0.26914374 | 2.20800952 | Sulfate adenylyltransferase subunit 2 (E          |
| PiIG | Q9HYG6 | 0.26789276 | 2.66537182 | Uncharacterized protein                           |
| PiIG | Q9I402 | 0.26670305 | 2.22865462 | Probable binding protein component of             |

|      |        |            |            |                                           |
|------|--------|------------|------------|-------------------------------------------|
| PiIG | Q9HX25 | 0.2665426  | 6.79283285 | Lipoyl synthase (EC 2.8.1.8) (Lip-syn) (L |
| PiIG | Q9HTL4 | 0.26645321 | 1.78187231 | OxyR                                      |
| PiIG | Q9HU11 | 0.26635294 | 1.12825364 | Uncharacterized protein                   |
| PiIG | Q9HYX8 | 0.2658127  | 2.02498148 | Peptidyl-prolyl cis-trans isomerase (EC 5 |
| PiIG | Q9HTI8 | 0.26504995 | 4.73988322 | Probable ATP-binding component of AB      |
| PiIG | Q9HXW7 | 0.26443575 | 4.44887063 | Glycerol-3-phosphate acyltransferase (C   |
| PiIG | Q9HXI8 | 0.26436951 | 2.2280136  | Cysteine desulfurase IscS (EC 2.8.1.7)    |
| PiIG | Q9IOL5 | 0.2638017  | 2.67338459 | Isocitrate dehydrogenase [NADP] (EC 1.    |
| PiIG | Q9I340 | 0.26335504 | 3.28180133 | Enolase-phosphatase E1 (EC 3.1.3.77) (;   |
| PiIG | Q9HV67 | 0.26274561 | 5.43334201 | Glucose-6-phosphate isomerase (GPI) (I    |
| PiIG | Q9I585 | 0.26234072 | 2.07624285 | Uncharacterized protein                   |
| PiIG | Q9HWQ1 | 0.26159744 | 3.73183542 | Probable sulfite or nitrite reductase     |
| PiIG | Q9HT16 | 0.26146153 | 1.66915086 | ATP synthase subunit b (ATP synthase F    |
| PiIG | Q9I494 | 0.26138321 | 2.93526954 | Uncharacterized protein                   |
| PiIG | Q9I7C4 | 0.26114571 | 1.32266252 | DNA polymerase III subunit beta (EC 2.7   |
| PiIG | P32722 | 0.26099316 | 5.61461568 | Porin D (EC 3.4.21.-) (Imipenem/basic a   |
| PiIG | P00282 | 0.25970155 | 4.14120045 | Azurin                                    |
| PiIG | Q9I2Q2 | 0.25857035 | 9.28135368 | Methionine synthase (EC 2.1.1.13) (5-m    |
| PiIG | Q9I2U7 | 0.25764421 | 3.33621278 | Cysteine--tRNA ligase (EC 6.1.1.16) (Cys  |
| PiIG | Q9I662 | 0.25545256 | 1.97441134 | Probable cold-shock protein               |
| PiIG | Q9I4S1 | 0.25460841 | 2.53423635 | Uncharacterized protein                   |
| PiIG | Q9HWE6 | 0.254193   | 6.01660118 | 50S ribosomal protein L24                 |
| PiIG | Q9I4Q8 | 0.2539311  | 8.12255554 | Probable short-chain dehydrogenase        |
| PiIG | Q9HZ66 | 0.25299002 | 2.19666882 | Phosphoserine aminotransferase (EC 2.     |
| PiIG | Q9IOM6 | 0.25182183 | 4.36733577 | Serine--tRNA ligase (EC 6.1.1.11) (Seryl- |
| PiIG | Q9I6K6 | 0.25160925 | 4.02058945 | Uncharacterized protein                   |
| PiIG | Q9HVQ7 | 0.24966141 | 2.63508079 | PKHD-type hydroxylase PiuC (EC 1.14.1:    |
| PiIG | Q9I406 | 0.2493516  | 3.85065975 | Gamma-glutamyltranspeptidase (EC 2.3      |
| PiIG | Q9HT25 | 0.24932311 | 1.92221996 | Glutamine--fructose-6-phosphate amin      |
| PiIG | Q9I588 | 0.24926043 | 3.6424178  | Probable oxidoreductase                   |
| PiIG | Q9HZP6 | 0.24910606 | 1.584242   | Electron transfer flavoprotein subunit b  |
| PiIG | Q9HUP3 | 0.24797306 | 2.87337775 | NH(3)-dependent NAD(+) synthetase (E      |
| PiIG | Q9HZU4 | 0.24755053 | 6.42250662 | Precorrin-3 methylase CobJ                |
| PiIG | Q9HZJ2 | 0.24694704 | 2.07577214 | Fatty acid oxidation complex subunit al   |
| PiIG | Q9HUC0 | 0.24680531 | 3.16890244 | Ubiquinone/menaquinone biosynthesis       |
| PiIG | Q9HYX7 | 0.2455747  | 4.07876989 | Recombination-associated protein RdgC     |
| PiIG | Q9I6J5 | 0.24524438 | 3.44222802 | Probable glutamine synthetase             |
| PiIG | Q9HVX6 | 0.24491764 | 4.53999671 | Tryptophan--tRNA ligase (EC 6.1.1.2) (T   |
| PiIG | Q9HV48 | 0.24439018 | 2.42282671 | ATP-dependent zinc metalloprotease Ft     |
| PiIG | Q9HV60 | 0.2442737  | 3.13413957 | Uncharacterized protein                   |
| PiIG | Q9HWJ1 | 0.24412741 | 2.73160939 | Probable FAD-dependent monooxygena        |
| PiIG | Q9HY12 | 0.24368671 | 11.337654  | Uncharacterized protein                   |
| PiIG | Q9HYY4 | 0.24339569 | 10.5760614 | Probable oxidoreductase                   |
| PiIG | Q9HZE0 | 0.2431276  | 10.8882664 | NAD-specific glutamate dehydrogenase      |
| PiIG | Q9I3Q7 | 0.24223733 | 2.92366127 | Uncharacterized protein                   |

|      |        |            |            |                                            |
|------|--------|------------|------------|--------------------------------------------|
| PiIG | Q9I376 | 0.24177242 | 2.56855665 | Probable short-chain dehydrogenase         |
| PiIG | Q9HUK6 | 0.24121399 | 23.5106402 | FimX                                       |
| PiIG | Q9I399 | 0.23711093 | 4.06729551 | Uncharacterized protein                    |
| PiIG | Q9HVA2 | 0.23709716 | 6.09995445 | Ketol-acid reductoisomerase (EC 1.1.1.8    |
| PiIG | G3XD74 | 0.23576056 | 2.31790152 | D-ala-D-ala-carboxypeptidase               |
| PiIG | Q9HZ78 | 0.23535231 | 4.84836777 | LPS biosynthesis protein WbpG              |
| PiIG | Q9HTW3 | 0.23481267 | 3.21729442 | Cell division protein ZapA (Z ring-associ  |
| PiIG | Q9HTF1 | 0.2340372  | 2.81194652 | Low specificity L-threonine aldolase (Lo   |
| PiIG | Q9HY58 | 0.23263323 | 5.44475069 | Probable nucleotide sugar dehydrogenase    |
| PiIG | Q9HUP4 | 0.23258701 | 3.37512358 | Nicotinate phosphoribosyltransferase 1     |
| PiIG | Q9I418 | 0.2315156  | 3.73498866 | Threonine dehydratase, biosynthetic        |
| PiIG | Q9HYU4 | 0.23128917 | 2.00740161 | Long-chain-fatty-acid--CoA ligase          |
| PiIG | Q9HWD0 | 0.22971231 | 1.34201612 | 30S ribosomal protein S12                  |
| PiIG | Q9XCX8 | 0.22922696 | 4.5850787  | GTPase Era                                 |
| PiIG | Q9I4Q6 | 0.22905422 | 4.5850787  | Probable heat shock protein (Hsp90 fan     |
| PiIG | Q9I0Q4 | 0.22775918 | 5.37778309 | Uncharacterized protein                    |
| PiIG | Q9I2R2 | 0.22703911 | 2.25231651 | Probable oxidoreductase                    |
| PiIG | Q9I2Q7 | 0.22533222 | 4.15605508 | Sulfite reductase                          |
| PiIG | O69077 | 0.22528127 | 4.45683155 | Aspartokinase (EC 2.7.2.4) (Aspartate ki   |
| PiIG | G3XDA5 | 0.22485324 | 3.95622258 | Anaerobically-induced outer membran        |
| PiIG | Q9I5G8 | 0.22467706 | 6.77973391 | Elongation factor 4 (EF-4) (EC 3.6.5.n1)   |
| PiIG | Q9I0T3 | 0.22319828 | 10.1370669 | Probable transcriptional regulator         |
| PiIG | Q9HUF4 | 0.22297756 | 3.29487526 | Glutamate-ammonia-ligase adenylyltra       |
| PiIG | Q9HV83 | 0.22291985 | 2.1211116  | Probable aminotransferase                  |
| PiIG | Q9I3X2 | 0.22260617 | 4.34218807 | Uncharacterized protein                    |
| PiIG | O82852 | 0.22143101 | 2.82929977 | Uridylate kinase (UK) (EC 2.7.4.22) (Uric  |
| PiIG | G3XCW5 | 0.21906259 | 0.76094314 | Uncharacterized protein                    |
| PiIG | Q9I1A1 | 0.21905746 | 3.21729442 | Probable aldehyde dehydrogenase            |
| PiIG | Q51548 | 0.2183235  | 6.77562679 | L-ornithine 5-monooxygenase (EC 1.13.      |
| PiIG | P95453 | 0.21738753 | 2.89489925 | Probable RNA-binding protein PA4753        |
| PiIG | P38098 | 0.21723799 | 3.35742026 | Carbamoyl-phosphate synthase small cl      |
| PiIG | Q9HXP8 | 0.21539287 | 1.79011368 | Signal recognition particle protein (Fifty |
| PiIG | Q9I2P8 | 0.21475913 | 0.64270753 | Fe/S biogenesis protein NfuA               |
| PiIG | Q9HZP8 | 0.21187242 | 3.89079858 | Putative reductase PA2950 (EC 1.3.1.-)     |
| PiIG | Q9I730 | 0.20966706 | 2.67810167 | Carbonic anhydrase (EC 4.2.1.1)            |
| PiIG | Q9HTM1 | 0.20829566 | 2.45315173 | DNA-directed RNA polymerase subunit        |
| PiIG | Q9I184 | 0.20572626 | 6.3630255  | Pyoverdine synthetase F                    |
| PiIG | Q9HTD9 | 0.20497642 | 3.03391758 | Alcohol dehydrogenase                      |
| PiIG | Q59643 | 0.20472397 | 2.88611844 | Delta-aminolevulinic acid dehydratase (    |
| PiIG | Q9HX32 | 0.20375024 | 1.87710734 | LPS-assembly lipoprotein LptE              |
| PiIG | Q9I2Z1 | 0.20234456 | 2.7708304  | Uncharacterized protein                    |
| PiIG | Q9I6Y9 | 0.20198475 | 2.53711185 | Nonspecific ribonucleoside hydrolase       |
| PiIG | Q9HWL9 | 0.20107501 | 3.21729442 | Probable short-chain dehydrogenase         |
| PiIG | P26275 | 0.20026489 | 0.82941918 | Positive alginate biosynthesis regulator   |
| PiIG | Q9HV90 | 0.19995852 | 1.65982653 | Heme-transport protein, PhuT               |

|      |        |            |            |                                           |
|------|--------|------------|------------|-------------------------------------------|
| PiIG | Q9HV72 | 0.19941418 | 9.55203933 | Poly(A) polymerase I (PAP I) (EC 2.7.7.1) |
| PiIG | Q9I5V8 | 0.19885224 | 1.20555386 | 30S ribosomal protein S21                 |
| PiIG | Q9HZC5 | 0.19882634 | 3.32471163 | Aminopeptidase N                          |
| PiIG | Q9I088 | 0.19873673 | 1.73884886 | Ecotin                                    |
| PiIG | Q9HZ76 | 0.19793194 | 2.03660577 | UDP-2-acetamido-2-deoxy-3-oxo-D-gluc      |
| PiIG | Q9HYF6 | 0.19624956 | 1.30594323 | Probable antioxidant protein              |
| PiIG | Q51342 | 0.19610729 | 1.7386471  | Amidophosphoribosyltransferase (ATas      |
| PiIG | Q9HT40 | 0.19480175 | 4.5850787  | Uncharacterized protein                   |
| PiIG | Q9HY13 | 0.19472983 | 2.52819651 | Uncharacterized protein                   |
| PiIG | G3XDB0 | 0.1940976  | 2.97691127 | Catabolite repression control protein     |
| PiIG | Q9HWC4 | 0.19283861 | 1.58113883 | Transcription termination/antiterminat    |
| PiIG | Q9I5A7 | 0.19215491 | 2.50334787 | Uncharacterized protein                   |
| PiIG | Q9HWX4 | 0.19042176 | 3.94101938 | 3,4-dihydroxy-2-butanone 4-phosphate      |
| PiIG | Q9HXU3 | 0.18941326 | 2.71228665 | Uncharacterized protein                   |
| PiIG | Q9HTE2 | 0.18939795 | 5.01703029 | Uncharacterized protein                   |
| PiIG | P33640 | 0.18911804 | 4.5850787  | Ribosomal large subunit pseudouridine     |
| PiIG | O82853 | 0.18789782 | 3.75873568 | Ribosome-recycling factor (RRF) (Ribosc   |
| PiIG | Q9HVI7 | 0.18671753 | 1.99372596 | Serine hydroxymethyltransferase 3 (SHI    |
| PiIG | P26480 | 0.18591686 | 4.23533096 | RNA polymerase sigma factor RpoD (Sig     |
| PiIG | Q9HX22 | 0.18396354 | 4.53548971 | Ribosomal silencing factor RsfS           |
| PiIG | Q9HXV0 | 0.18333116 | 2.84212333 | Probable metal-transporting P-type ATF    |
| PiIG | P50601 | 0.18331407 | 3.11724932 | Protein TolB                              |
| PiIG | Q9HYR2 | 0.18238507 | 3.89042451 | 3-oxoacyl-[acyl-carrier-protein] synthas  |
| PiIG | Q9HW10 | 0.18099365 | 4.73988322 | Probable two-component response reg       |
| PiIG | Q9I099 | 0.18031633 | 2.35804468 | Threonine--tRNA ligase (EC 6.1.1.3) (Thi  |
| PiIG | Q9HUE1 | 0.18029139 | 3.40460757 | Uncharacterized protein                   |
| PiIG | Q9HXQ0 | 0.18002789 | 3.99996946 | Ribosome maturation factor RimM           |
| PiIG | P50587 | 0.17998717 | 3.01946326 | Orotate phosphoribosyltransferase (OP     |
| PiIG | Q9I2Q5 | 0.17996014 | 4.5499414  | Uncharacterized protein                   |
| PiIG | Q9I4K5 | 0.17925325 | 4.73988322 | Rhamnosyltransferase 2                    |
| PiIG | Q9I645 | 0.17916717 | 4.92795923 | Probable glutathione S-transferase        |
| PiIG | Q9I5U9 | 0.17804192 | 2.04343246 | Uncharacterized protein                   |
| PiIG | Q9HV61 | 0.17715171 | 1.01983145 | UPF0337 protein PA4738                    |
| PiIG | Q9HXI0 | 0.17519277 | 1.25071001 | Uncharacterized protein                   |
| PiIG | Q9S646 | 0.17240434 | 3.6024879  | Polyphosphate kinase (EC 2.7.4.1) (ATP-   |
| PiIG | Q9HXZ2 | 0.17234138 | 1.90528987 | Acetyl-coenzyme A carboxylase carboxy     |
| PiIG | Q9HZP7 | 0.17006094 | 1.30215323 | Electron transfer flavoprotein subunit a  |
| PiIG | Q9HZL4 | 0.16838579 | 3.84501774 | Probable phosphodiesterase                |
| PiIG | Q9HYY0 | 0.16746772 | 4.66787528 | Probable transcriptional regulator        |
| PiIG | O52762 | 0.16706166 | 0.96346813 | Catalase (EC 1.11.1.6)                    |
| PiIG | Q9HXR4 | 0.16597794 | 1.99110449 | Uncharacterized protein                   |
| PiIG | Q9I3I0 | 0.1649306  | 1.4426382  | Nucleoid-associated protein PA1533        |
| PiIG | P43903 | 0.16446423 | 2.88809738 | Quinone oxidoreductase (EC 1.6.5.5) (N    |
| PiIG | Q9I4H8 | 0.16361146 | 1.8381832  | Probable cold-shock protein               |
| PiIG | Q9HXM5 | 0.16355428 | 2.44345452 | Inosine-5'-monophosphate dehydrogen       |

|      |        |            |            |                                           |
|------|--------|------------|------------|-------------------------------------------|
| PiIG | Q9I4N9 | 0.1623339  | 2.56855665 | Uncharacterized protein                   |
| PiIG | Q9I1U2 | 0.16140231 | 2.94911153 | Uncharacterized protein                   |
| PiIG | Q9HUG0 | 0.16066594 | 2.4048569  | Probable carbamoyl transferase            |
| PiIG | G3XD94 | 0.15926428 | 1.6390495  | UDP-N-acetyl-D-glucosamine 6-dehydr       |
| PiIG | P37798 | 0.15905412 | 2.16689673 | Biotin carboxylase (EC 6.3.4.14) (Acetyl- |
| PiIG | Q9HWX1 | 0.15794369 | 2.03706284 | Transcriptional repressor NrdR            |
| PiIG | Q9I3R8 | 0.15779951 | 4.01006354 | Uncharacterized protein                   |
| PiIG | Q9I589 | 0.15571205 | 4.45410663 | Chitin-binding protein CbpD               |
| PiIG | Q9HX48 | 0.15554771 | 3.21729442 | Ribosomal large subunit pseudouridine     |
| PiIG | P57668 | 0.15505213 | 1.72643423 | Probable thiol peroxidase (EC 1.11.1.-)   |
| PiIG | Q9I0F3 | 0.15469861 | 3.34965649 | Uncharacterized protein                   |
| PiIG | Q9I6Z1 | 0.15467839 | 3.61130128 | Uncharacterized protein                   |
| PiIG | Q9I7A7 | 0.1543109  | 4.8001749  | Uncharacterized protein                   |
| PiIG | Q9HYP7 | 0.15144042 | 3.20377509 | Probable chemotaxis protein               |
| PiIG | Q9HZX0 | 0.14995007 | 2.85476825 | Probable transcriptional regulator        |
| PiIG | P53641 | 0.14823031 | 1.93200094 | Superoxide dismutase [Fe] (EC 1.15.1.1)   |
| PiIG | Q9I500 | 0.14808934 | 2.56855665 | Uncharacterized protein                   |
| PiIG | Q9I4Q3 | 0.1472743  | 1.84819023 | Uncharacterized protein                   |
| PiIG | Q9HW90 | 0.14554563 | 3.81477075 | Uncharacterized protein                   |
| PiIG | Q9I347 | 0.14474997 | 2.22033831 | 50S ribosomal protein L3 glutamine me     |
| PiIG | Q9I696 | 0.14438169 | 16.8460778 | Component of chemotactic signal trans     |
| PiIG | Q9I671 | 0.14385852 | 2.56773958 | Glutaryl-CoA dehydrogenase                |
| PiIG | Q9I344 | 0.1431612  | 2.64541463 | Chorismate synthase (EC 4.2.3.5) (5-enc   |
| PiIG | Q9HU65 | 0.1419529  | 1.75533299 | Glutamine synthetase (EC 6.3.1.2) (Glut   |
| PiIG | Q9HUG1 | 0.14160729 | 2.13907731 | Probable glycosyl transferase             |
| PiIG | Q9I747 | 0.14003129 | 2.24966924 | Protein hcp1                              |
| PiIG | Q9HVU9 | 0.13618958 | 2.58116517 | PmbA protein                              |
| PiIG | Q9HVW9 | 0.13456887 | 1.84553338 | Histidinol dehydrogenase (HDH) (EC 1.1    |
| PiIG | Q9HW02 | 0.13100521 | 2.59357022 | UDP-N-acetylmuramate--L-alanine ligas     |
| PiIG | Q9HZI1 | 0.12888077 | 2.17793859 | Probable FAD-dependent glycerol-3-ph      |
| PiIG | Q51473 | 0.12815308 | 1.90300731 | Integration host factor subunit beta (IH  |
| PiIG | Q9HZG0 | 0.12715925 | 3.79896131 | Ribosomal RNA large subunit methyltra     |
| PiIG | Q9HWQ0 | 0.1238933  | 2.23248165 | Probable iron-sulfur protein              |
| PiIG | Q9HTY8 | 0.12384671 | 2.72400442 | Uncharacterized protein                   |
| PiIG | Q9HZJ5 | 0.12161946 | 4.1462397  | DNA topoisomerase 1 (EC 5.99.1.2) (DN     |
| PiIG | Q9HT70 | 0.11960179 | 4.9339714  | Methionine import ATP-binding protein     |
| PiIG | Q9I6M1 | 0.11874851 | 9.444315   | Uncharacterized protein                   |
| PiIG | Q9HV50 | 0.11656991 | 3.46004706 | Phosphoglucosamine mutase (EC 5.4.2.      |
| PiIG | Q9HXA0 | 0.11536797 | 2.53711185 | Probable protease                         |
| PiIG | Q9I2U1 | 0.11525359 | 1.94626959 | ATP-dependent Clp protease proteolyti     |
| PiIG | Q9I352 | 0.11523686 | 3.49963551 | Bacteriohemerythrin                       |
| PiIG | Q9HV06 | 0.11332286 | 3.21729442 | Uncharacterized protein                   |
| PiIG | POC2B2 | 0.11202495 | 2.7466854  | Thiol:disulfide interchange protein Dsb/  |
| PiIG | Q9HZG2 | 0.11178168 | 2.29062661 | Uncharacterized protein                   |
| PiIG | Q9HTW5 | 0.1111763  | 2.26768137 | UPF0149 protein PA5225                    |

|      |         |            |            |                                          |
|------|---------|------------|------------|------------------------------------------|
| PiIG | Q9I709  | 0.10992524 | 2.63508079 | Probable transcriptional regulator       |
| PiIG | Q9I1E8  | 0.10958342 | 3.12018962 | Uncharacterized protein                  |
| PiIG | Q9HYJ2  | 0.10910913 | 3.85382251 | Uncharacterized protein                  |
| PiIG | Q9H XK5 | 0.10774446 | 2.28574915 | 2-isopropylmalate synthase (EC 2.3.3.13) |
| PiIG | Q9HYE5  | 0.10548454 | 3.44317679 | Uncharacterized protein                  |
| PiIG | Q9I6J2  | 0.10534019 | 2.23105996 | Putrescine aminotransferase              |
| PiIG | Q9HTT8  | 0.10533512 | 1.88379415 | Uncharacterized protein                  |
| PiIG | Q9I748  | 0.1033329  | 2.23034973 | Uncharacterized protein                  |
| PiIG | Q9I753  | 0.10303897 | 2.16568183 | Uncharacterized protein                  |
| PiIG | Q9I324  | 0.10270648 | 2.85775929 | Translocator protein PopB                |
| PiIG | G3XD39  | 0.10165557 | 2.71228665 | Probable bacteriophage protein           |
| PiIG | P52477  | 0.09790164 | 2.14961086 | Multidrug resistance protein MexA        |
| PiIG | Q9HZ52  | 0.09777022 | 3.21729442 | Uncharacterized protein                  |
| PiIG | Q9HVQ3  | 0.09736125 | 3.18826686 | Ornithine decarboxylase                  |
| PiIG | Q9I151  | 0.09624362 | 1.90884751 | Uncharacterized protein                  |
| PiIG | Q9HY01  | 0.0956173  | 1.61080271 | Alcohol dehydrogenase class III          |
| PiIG | Q9I363  | 0.09551148 | 5.66599793 | Probable ClpA/B-type protease            |
| PiIG | Q9HTY0  | 0.09219394 | 4.68054897 | Probable secretion pathway ATPase        |
| PiIG | Q9I4I2  | 0.09158164 | 1.9357718  | Ribonucleoside-diphosphate reductase     |
| PiIG | Q9HVZ2  | 0.08972646 | 1.64820122 | Uncharacterized protein                  |
| PiIG | Q9HUT2  | 0.08951288 | 2.63508079 | Uncharacterized protein                  |
| PiIG | Q9HYF1  | 0.08787272 | 2.22796327 | Uncharacterized protein                  |
| PiIG | Q9HUG9  | 0.08632417 | 2.03772826 | Bifunctional protein HldE [Includes: D-b |
| PiIG | Q9HTV6  | 0.08552582 | 2.7096243  | Probable oxidoreductase                  |
| PiIG | Q9HTW6  | 0.08110424 | 2.22560855 | Aminopeptidase P                         |
| PiIG | Q9HVC2  | 0.08098448 | 2.42270589 | Ribosome-binding ATPase YchF             |
| PiIG | Q9HYZ6  | 0.07890867 | 2.59407302 | Site-determining protein                 |
| PiIG | Q9I742  | 0.07802128 | 4.80937283 | Protein ClpV1                            |
| PiIG | Q9HTK9  | 0.07775079 | 2.34428203 | Rubredoxin-NAD(+) reductase (RdxR) (E    |
| PiIG | Q9I046  | 0.07756449 | 1.10090228 | Uncharacterized protein                  |
| PiIG | Q9I198  | 0.07744347 | 1.5673278  | Uncharacterized protein                  |
| PiIG | Q9HYV7  | 0.07602238 | 2.66311669 | Uncharacterized protein                  |
| PiIG | Q9I0Q1  | 0.07015695 | 2.18583266 | UvrABC system protein C (Protein UvrC)   |
| PiIG | Q59653  | 0.07008728 | 2.85883464 | Aspartate carbamoyltransferase (EC 2.1   |
| PiIG | Q9HX79  | 0.06967954 | 3.52028322 | Taurine import ATP-binding protein Tau   |
| PiIG | Q9HYP2  | 0.06918637 | 1.48517987 | Uncharacterized protein                  |
| PiIG | Q9HVG0  | 0.06890372 | 2.22500546 | Uncharacterized protein                  |
| PiIG | P23926  | 0.06785558 | 1.92749    | Transcriptional activator protein anr    |
| PiIG | Q9HZF5  | 0.06774265 | 4.69076471 | Probable hydrolytic enzyme               |
| PiIG | Q9HYR5  | 0.06736197 | 1.75553791 | Probable short chain dehydrogenase       |
| PiIG | G3XD43  | 0.06621961 | 2.29959276 | Type 4 fimbrial biogenesis protein PilE  |
| PiIG | Q9HTY4  | 0.06504943 | 2.40194306 | Acetylornithine deacetylase              |
| PiIG | Q9HZI6  | 0.0650067  | 2.00866325 | Probable soluble lytic transglycosylase  |
| PiIG | Q9HXI2  | 0.06462244 | 1.55784128 | Protein translocase subunit SecF         |
| PiIG | Q9HT33  | 0.06119422 | 3.06073894 | Dihydroorotase                           |

|      |         |            |            |                                           |
|------|---------|------------|------------|-------------------------------------------|
| PiIG | O87125  | 0.06070471 | 1.76976436 | Chemotaxis response regulator protein     |
| PiIG | Q9HTY1  | 0.05883341 | 1.90971917 | Uncharacterized protein                   |
| PiIG | P00106  | 0.05300439 | 1.91154098 | Cytochrome c4                             |
| PiIG | Q9I7B8  | 0.05263035 | 2.45412904 | Glycine--tRNA ligase beta subunit (EC 6.  |
| PiIG | Q9I149  | 0.0493613  | 1.89044002 | Uncharacterized protein                   |
| PiIG | Q9HVF2  | 0.0482796  | 1.50316295 | Uncharacterized protein                   |
| PiIG | Q9HXJ9  | 0.04794358 | 3.02407505 | Probable aminotransferase                 |
| PiIG | Q9HVV5  | 0.0464613  | 2.79545652 | Uncharacterized protein                   |
| PiIG | Q9HVV8  | 0.04497886 | 4.15103457 | UPF0307 protein PA4473                    |
| PiIG | Q9HUA5  | 0.04320476 | 3.22162899 | Glucans biosynthesis protein G            |
| PiIG | Q9I2N2  | 0.04244328 | 2.70500009 | Molybdate-binding periplasmic protein     |
| PiIG | Q9I4W5  | 0.04161726 | 1.52744332 | Bacterioferritin comigratory protein      |
| PiIG | Q9HXJ7  | 0.04100716 | 1.32684952 | Outer membrane protein assembly fact      |
| PiIG | Q9HYU8  | 0.04059544 | 1.7114203  | Probable HIT family protein               |
| PiIG | Q9HWX5  | 0.04043368 | 2.89410938 | 6,7-dimethyl-8-ribityllumazine synthase   |
| PiIG | Q9I6X7  | 0.03782155 | 4.06482619 | Transcriptional regulator PcaR            |
| PiIG | Q9HXY4  | 0.03725691 | 1.99502562 | Outer membrane protein assembly fact      |
| PiIG | Q9HXZ5  | 0.03610002 | 2.40135145 | Enolase (EC 4.2.1.11) (2-phospho-D-glyc   |
| PiIG | Q9HY15  | 0.03412079 | 1.5519286  | Uncharacterized protein                   |
| PiIG | Q9HTD1  | 0.03390434 | 1.74955932 | Probable transcarboxylase subunit         |
| PiIG | O68281  | 0.03352067 | 6.00237921 | HTH-type transcriptional regulator HexI   |
| PiIG | P45684  | 0.03153309 | 1.74872201 | RNA polymerase sigma factor RpoS (Sig     |
| PiIG | Q9I407  | 0.03124571 | 2.50758792 | Glutaminase-asparaginase (EC 3.5.1.38)    |
| PiIG | Q9I0A3  | 0.03055967 | 2.08574171 | Phenylalanine--tRNA ligase alpha subur    |
| PiIG | P33883  | 0.03016442 | 3.11570624 | Acyl-homoserine-lactone synthase (EC ;    |
| PiIG | Q9HVA9  | 0.03005723 | 3.2579568  | Uncharacterized protein                   |
| PiIG | Q9I0L4  | 0.02979188 | 3.00771781 | Isocitrate dehydrogenase                  |
| PiIG | O69078  | 0.02848371 | 2.62243894 | Carbon storage regulator homolog          |
| PiIG | P52111  | 0.02834875 | 2.02461809 | Glycerol-3-phosphate dehydrogenase (l     |
| PiIG | Q9HWU9  | 0.02810934 | 1.50078548 | Probable dehydrogenase                    |
| PiIG | Q9HZ90  | 0.02761607 | 3.33621278 | Probable transcriptional regulator        |
| PiIG | Q9HTL0  | 0.02606602 | 2.94600652 | DNA-binding protein HU-alpha              |
| PiIG | Q9I1E7  | 0.02569665 | 1.33398596 | Uncharacterized protein                   |
| PiIG | Q9HUV9  | 0.02560649 | 2.28744549 | Bifunctional purine biosynthesis proteir  |
| PiIG | Q9I6J1  | 0.02555923 | 1.43899664 | Putrescine-binding periplasmic protein    |
| PiIG | Q9HT95  | 0.02551315 | 1.68507539 | Uncharacterized protein                   |
| PiIG | Q9HUL8  | 0.02529141 | 4.44807693 | DNA mismatch repair protein MutL          |
| PiIG | Q9I5Q3  | 0.0252342  | 2.80719033 | Tyrosine--tRNA ligase 2 (EC 6.1.1.1) (Tyr |
| PiIG | Q9HVVH9 | 0.0243695  | 1.13167483 | Uncharacterized protein                   |
| PiIG | Q9I1N7  | 0.02386837 | 2.04716849 | PslB                                      |
| PiIG | Q9HUC6  | 0.02349924 | 1.59459299 | ATP-dependent protease subunit HslV (     |
| PiIG | Q9I5L3  | 0.02331047 | 3.25677781 | Uncharacterized protein                   |
| PiIG | Q9I3J3  | 0.02308355 | 2.72678512 | Probable transcriptional regulator        |
| PiIG | Q9HUF6  | 0.02266115 | 2.29104923 | UDP-glucose:(Heptosyl) LPS alpha 1,3-g    |
| PiIG | Q9HXI1  | 0.0218855  | 1.28345203 | Protein translocase subunit SecD          |



|      |        |            |            |                                           |
|------|--------|------------|------------|-------------------------------------------|
| PiIG | Q9HY84 | 0.02165565 | 1.22077005 | Argininosuccinate synthase (EC 6.3.4.5)   |
| PiIG | Q9HUT7 | 0.02115458 | 1.97980301 | Osmotically inducible lipoprotein OsmE    |
| PiIG | Q9I3E5 | 0.02065901 | 3.61073265 | Uncharacterized protein                   |
| PiIG | Q9HUL5 | 0.02030092 | 2.16598994 | Uncharacterized protein                   |
| PiIG | G3XCU6 | 0.01962645 | 2.08222769 | Transcriptional regulator CysB            |
| PiIG | Q9HV76 | 0.01924725 | 1.77594778 | Probable aminotransferase                 |
| PiIG | Q9I773 | 0.01785587 | 1.83797167 | Osmotically inducible protein OsmC        |
| PiIG | Q9HZJ3 | 0.01691384 | 1.66609394 | 3-ketoacyl-CoA thiolase (EC 2.3.1.16) (A  |
| PiIG | Q9I636 | 0.01685719 | 2.28285357 | Malate synthase G (EC 2.3.3.9)            |
| PiIG | Q9I3L9 | 0.01669029 | 2.01290837 | Sulfate-binding protein of ABC transpor   |
| PiIG | Q9HWK5 | 0.0161651  | 1.71578005 | Peptidyl-prolyl cis-trans isomerase C2    |
| PiIG | Q9I3L8 | 0.01441813 | 1.37294388 | Uncharacterized protein                   |
| PiIG | P38103 | 0.01423082 | 1.17385669 | 4-hydroxy-tetrahydrodipicolinate reduc    |
| PiIG | Q9HVM4 | 0.01378674 | 1.40780661 | Isoleucine--tRNA ligase (EC 6.1.1.5) (Iso |
| PiIG | Q51390 | 0.01328726 | 1.11166835 | Glycerol kinase 2 (EC 2.7.1.30) (ATP:glyc |
| PiIG | Q9HT11 | 0.01307915 | 2.84692475 | Chromosome partitioning protein Soj       |
| PiIG | Q9I658 | 0.01249245 | 1.71921551 | Uncharacterized protein                   |
| PiIG | Q9HYK7 | 0.01199945 | 1.70747482 | Ferredoxin--NADP+ reductase               |
| PiIG | Q9HY63 | 0.01189065 | 2.97305935 | Bifunctional polymyxin resistance prote   |
| PiIG | Q9I1R3 | 0.01188926 | 2.42791556 | Probable binding protein component of     |
| PiIG | Q9HVS6 | 0.01090368 | 1.2300281  | Uncharacterized protein                   |
| PiIG | Q9HUT3 | 0.00985403 | 1.94563536 | Probable bacterioferritin                 |
| PiIG | Q9HV54 | 0.00978946 | 1.3724245  | N utilization substance protein A         |
| PiIG | Q9I5A3 | 0.00948917 | 2.54227149 | Peptidyl-prolyl cis-trans isomerase (EC : |
| PiIG | P43502 | 0.00876714 | 3.61350777 | Protein Pill                              |
| PiIG | Q9I1W4 | 0.00837876 | 1.28847853 | Alpha-1,4-glucan:maltose-1-phosphate      |
| PiIG | G3XCX8 | 0.00831661 | 1.3574618  | Uncharacterized protein                   |
| PiIG | Q9X6P4 | 0.0082566  | 3.16791268 | Acyl-[acyl-carrier-protein]--UDP-N-acet   |
| PiIG | G3XCZ3 | 0.00822773 | 4.76884539 | Type 4 fimbrial biogenesis protein PilZ   |
| PiIG | Q9I083 | 0.00719593 | 2.07377118 | Probable outer membrane protein           |
| PiIG | Q9HYE7 | 0.00666251 | 2.04486654 | Asparagine synthetase (EC 6.3.5.4)        |
| PiIG | Q51391 | 0.00585707 | 5.11539597 | Glycerol-3-phosphate regulon represso     |
| PiIG | Q9HW32 | 0.00578887 | 1.0269344  | Insulin-cleaving metalloproteinase oute   |
| PiIG | Q9HX94 | 0.00544198 | 1.95303988 | Uncharacterized protein                   |
| PiIG | Q9HUM0 | 0.00398867 | 2.08406699 | RNA-binding protein Hfq                   |
| PiIG | Q9HYR8 | 0.00398422 | 1.24246997 | Probable non-ribosomal peptide synthe     |
| PiIG | Q9HWP9 | 0.00397492 | 1.88844338 | Uncharacterized protein                   |
| PiIG | Q9HZ61 | 0.00372722 | 1.5791943  | Probable short-chain dehydrogenase        |
| PiIG | Q9I120 | 0.00259636 | 4.37097938 | Uncharacterized protein                   |
| PiIG | G3XCX3 | 0.00250125 | 2.08211233 | Twitching motility protein PilU           |
| PiIG | Q9HW65 | 0.00183774 | 1.81431875 | Uncharacterized protein                   |
| PiIG | Q9HW87 | 0.00087719 | 1.29348874 | Formyltetrahydrofolate deformylase        |
| PiIG | P14165 | 0.0006251  | 6.86717759 | Citrate synthase (EC 2.3.3.16)            |
| PiIG | P43501 | 0.00043405 | 2.7514448  | Protein PilH                              |
| PiIG | Q9HWW5 | 0.0002456  | 1.40130184 | Uncharacterized protein                   |

PiG

P22608

0.0001896 2.61147882 Type 4 fimbrial assembly protein PilB

Gene.names

pilG PA0408  
PA4478  
PA4619  
cobB2 PA1197  
hslO PA5193  
PA0182  
PA3998  
rpmA PA4567  
fliM PA1443  
lexA PA3007  
PA4620  
gph2 PA3172  
PA4636  
PA1397  
chpB PA0414  
purM PA0945  
PA4621  
PA0359  
metR PA3587  
iscU PA3813  
ptsP PA0337  
cysG PA2611  
PA3021  
trpA PA0035  
fruI PA3562  
moeB PA4663  
PA1339  
trkA PA0016  
gacA PA2586  
hscA PA3810  
hcnB PA2194  
PA4461  
PA3612  
PA1298  
cysT PA0282  
ureB PA4867  
PA0840  
PA2983  
aruR PA4983  
wspD PA3705  
PA1661  
PA2010  
PA5029  
tsaD gcp PA0580

lpxK PA2981  
PA3606  
PA2963  
cttP PA0180  
PA0086  
PA3404  
argR PA0893  
PA2035  
fliF PA1101  
PA3943  
PA2077  
fha1 PA0081  
PA5445  
hitB PA4688  
dksA PA4723  
PA3729  
cobM PA2948  
coaE PA4529  
proC PA0393  
arcC PA5173  
ispG PA3803  
rbsK PA1950  
PA2707  
fimL PA1822  
slyX PA0960  
pta PA0835  
PA3898  
PA2684  
fimV PA3115  
dnaB PA4931  
algB PA5483  
PA4795  
PA4697  
mnmA trmU PA2626  
PA1745  
narL PA3879  
algQ algR2 PA5255  
algH PA0405  
pdxA1 PA0593  
sdhB PA1584  
PA1015  
pilQ PA5040  
gpml pgm PA5131  
PA4434  
PA1344

rhIB rhl PA3861  
rho PA5239  
PA1243  
PA2831  
PA2730  
cobW PA2945  
mraZ PA4421  
PA2329  
foIE2 PA5539  
PA3023  
nrdJa PA5497  
PA4451  
glmU PA5552  
nuoI PA2644  
iscA PA3812  
PA4489  
relA PA0934  
PA0134  
ubiB PA5065  
PA4440  
clpX PA1802  
PA3297  
PA3481  
PA4180  
PA4518  
pcrH PA1707  
PA3312  
glpK1 glpK2 PA3579  
lpxD PA3646  
murG PA4412  
PA3696  
rpsF PA4935  
PA1458  
polA PA5493  
PA4520  
selD PA1642  
znuC PA5500  
PA5037  
PA0832  
PA5431  
mreB PA4481  
PA0988  
glgB PA2153  
grpE PA4762  
recA PA3617

pyrG PA3637  
hisC2 PA3165  
PA5535  
PA5245  
exoS PA3841  
fleQ PA1097  
groL groEL mopA PA4385  
fliD PA1094  
PA1009  
PA2402  
dnaE PA3640  
dnaK PA4761  
PA3754  
PA2912  
rhIE PA0428  
ftsZ PA4407  
erpA PA0665  
PA4381  
PA2534  
dauB PA3862  
spuF PA0302  
algP algR3 PA5253  
deaD PA2840  
sthA sth PA2991  
htpG PA1596  
nrdJb PA5496  
aspS PA0963  
PA4835  
rne PA2976  
PA3001  
putA PA0782  
roxR PA4493  
PA0685  
acnB PA1787  
PA2076  
gyrA PA3168  
PA0758  
PA3842  
fliN PA1444  
wbpl PA3148  
PA1116  
PA0399  
PA3981  
spoOJ PA5562  
secA PA4403

pvdJ PA2400  
gyrB PA0004  
PA2323  
popD PA1709  
tufA PA4265; tufB PA4277  
PA4061  
carB PA4756  
nuoG PA2642  
ssuB1 PA3442  
PA1341  
holB PA2961  
cysNC cysN PA4442  
PA0070  
oprG PA4067  
nuoB PA2638  
pvdL PA2424  
PA4474  
tig PA1800  
pnp PA4740  
pckA PA5192  
PA3891  
prs PA4670  
rplJ PA4272  
liuE PA2011  
dsbC PA3737  
speA PA4389  
sdhA PA1583  
ubiH PA5223  
PA4879  
PA2037  
PA2821  
rluC PA2975  
pvdD PA2399  
PA4135  
minE PA3245  
PA1069  
rimP PA4746  
atpG PA5555  
PA5190  
PA4701  
wbpB wlbA PA3158  
PA2735  
nuoF PA2641  
PA3040  
rplA PA4273

rplY ctc PA4671  
glgA PA2165  
lon PA1803  
accD PA3112  
PA3533  
PA3731  
accB fabE PA4847  
thiG PA0381  
rpsA PA3162  
clpA PA2620  
PA3466  
PA4011  
infC PA2743  
PA2483  
PA2161  
rplF PA4248  
rpmE PA5049  
PA3309  
dnaX PA1532  
rplM PA4433  
rplL PA4271  
rplK PA4274  
smpB PA4768  
parC PA4964  
PA0664  
galU PA2023  
infA PA2619  
der engA PA3799  
PA3940  
clpB PA4542  
PA0354  
murA PA4450  
rpmE2 PA3601  
rplE PA4251  
fusA fusA1 PA4266  
hupB PA1804  
PA4431  
PA4872  
hslU PA5054  
rnr PA4937  
rplV PA4258  
nadA PA1004  
phaF PA5060  
rluB PA3179  
rpoB PA4270



PA1127  
rpsK PA4240  
PA5301  
rplD PA4262  
rplN PA4253  
pepA phpA PA3831  
pykA PA4329  
sucB PA1586  
rplT PA2741  
secB PA5128  
aceE aceA PA5015  
rpsJ PA4264  
rpmC PA4255  
rpsM PA4241  
PA1164  
PA2675  
dctA2 PA1183  
rplI PA4932  
metG PA3482  
fkfB PA4572  
rpsQ PA4254  
PA4012  
rpoC PA4269  
ilvH PA4695  
rplP PA4256  
parE PA4967  
ptxR PA2258  
PA3529  
ppa PA4031  
rpsT PA4563  
PA5046  
rpsG PA4267  
rlmB PA4936  
PA0083  
nuoC nuoCD nuoD PA2639  
rplR PA4247  
radA sms PA4609  
sucA PA1585  
fabG PA2967  
rpsI PA4432  
acpP1 acpP PA2966  
aotP PA0892  
serA PA0316  
ahpC PA0139  
groS groES mopB PA4386

uvrA PA4234  
hflK PA4942  
pagL PA4661  
fliC PA1092  
rpsP PA3745  
PA2491  
aceF aceB PA5016  
ibpA PA3126  
PA4878  
PA3849  
wspB PA3707  
thiC PA4973  
PA3127  
rpmD PA4245  
rpsH PA4249  
PA2958  
mucD PA0766  
hcnC PA2195  
phoP PA1179  
ihfA himA PA2738  
PA4548  
atpD PA5554  
rpsE PA4246  
cycB PA5300  
rpsB PA3656  
PA3795  
sucD PA1589  
rplU PA4568  
hemL PA3977  
rplS PA3742  
rpsC PA4257  
metK PA0546  
atpH PA5557  
ftsA PA4408  
PA2634  
rplO PA4244  
PA5146  
ppiB PA1793  
PA0421  
rpsO PA4741  
fold PA1796  
PA1768  
PA3956  
pilA fimA PA4525  
amrZ PA3385

rpsS PA4259  
dnaJ PA4760  
rpsR PA4934  
selA PA4808  
sucC PA1588  
clpP2 PA3326  
pal oprL PA0973  
rpsN PA4250  
rpoA PA4238  
ccmH PA1482  
ppiD PA1805  
vfr PA0652  
mvaT PA4315  
ahcY sahH PA0432  
rplB PA4260  
trxB1 PA2616  
rpsD PA4239  
oprI PA2853  
rplC PA4263  
PA3250  
fur PA4764  
lpdG PA1587  
msrA PA5018  
metE PA1927  
ppsA PA1770  
lptF PA3692  
PA4064  
glyQ PA0009  
ilvI PA4696  
PA4200  
atpA PA5556  
PA0423  
rplQ PA4237  
PA3691  
rplW PA4261  
oprF PA1777  
PA2667  
rpmB PA5316  
alaS PA0903  
PA4456  
exoT PA0044  
lon PA0779  
cbrB PA4726  
PA0459  
PA0158

PA4699  
rpmF PA2970  
wspR PA3702  
oprH PA1178  
fabB PA1609  
ssuD PA3444  
fba fda PA0555  
gor PA2025  
tsf PA3655  
wbpD PA3156  
pscE PA1718  
argS PA5051  
acnA PA1562  
PA5258  
atpC PA5553  
PA3931  
algC PA5322  
Irp PA5308  
ssb PA4232  
PA4066  
PA4595  
amgR PA5200  
PA3965  
arcA PA5171  
pilM PA5044  
PA0962  
PA2871  
hom PA3736  
PA3659  
infB PA4744  
trxA trx PA5240  
PA0562  
fabA PA1610  
phzM PA4209  
PA4328  
PA5027  
obg PA4566  
pyrC' pyrX PA0401  
holC PA3832  
PA4352  
purA PA4938  
nrdA PA1156  
cysD PA4443  
PA3440  
PA1342

lipA PA3996  
oxyR PA5344  
PA5178  
PA3262  
PA5376  
plsB PA3673  
iscS PA3814  
icd PA2623  
mtnC PA1685  
pgi PA4732  
PA0856  
PA4130  
atpF PA5558  
PA1244  
dnaN PA0002  
oprD PA0958  
azu PA4922  
metH PA1843  
cysS PA1795  
PA0456  
PA1053  
rplX PA4252  
PA1066  
serC PA3167  
serS PA2612  
PA0284  
piuC PA4515  
ggt PA1338  
glmS PA5549  
PA0853  
etfB PA2952  
nadE PA4920  
cobJ PA2903  
fadB PA3014  
ubiE PA5063  
rdgC PA3263  
spul PA0296  
trpS PA4439  
ftsH PA4751  
PA4739  
pqsL PA4190  
PA3614  
PA3256  
gdhB PA3068  
PA1440

PA1649  
fimX PA4959  
PA1623  
ilvC PA4694  
dacC PA3999  
wbpG PA3150  
zapA PA5227  
ltaE PA5413  
PA3559  
pncB1 PA4919  
ilvA2 PA1326  
fadD1 PA3299  
rpsL PA4268  
era PA0771  
PA1068  
PA2582  
PA1833  
cysI PA1838  
lysC PA0904  
oprE PA0291  
lepA le PA0767  
PA2551  
glnE PA5014  
PA4715  
PA1372  
pyrH PA3654  
PA3031  
PA2378  
pvdA pvd-1 PA2386  
PA4753  
carA PA4758  
ffh PA3746  
nfuA PA1847  
PA2950  
PA0102  
rpoZ PA5337  
pvdF PA2396  
adhA PA5427  
hemB PA5243  
lptE PA3988  
PA1746  
nuh PA0143  
PA4162  
algR PA5261  
phuT PA4708

pcnB PA4727  
rpsU PA0579  
pepN PA3083  
eco PA2755  
wbpE PA3155  
PA3450  
purF PA3108  
PA5534  
PA3613  
crc PA5332  
nusG PA4275  
PA0833  
ribB PA4054  
PA3697  
PA5422  
rluD PA4544  
frr PA3653  
glyA2 PA4602  
rpoD rpoDA PA0576  
rsfS PA4005  
PA3690  
tolB PA0972  
fabH PA3333  
PA4396  
thrS PA2744  
PA5028  
rimM PA3744  
pyrE PA5331  
PA1840  
rhIC PA1130  
PA0473  
PA0588  
PA4738  
PA3822  
ppk PA5242  
accA PA3639  
etfA PA2951  
PA2990  
PA3260  
katA PA4236  
PA3728  
PA1533  
qor PA0023  
PA1159  
guaB PA3770

PA1090  
PA2173  
PA5005  
wbpA PA3159  
accC fabG PA4848  
nrdR PA4057  
PA1426  
cbpD PA0852  
rluE PA3968  
tpx PA2532  
PA2685  
PA0141  
PA0020  
PA3349  
PA2877  
sodB PA4366  
PA0959  
PA1076  
PA4311  
prmB PA1678  
chpA PA0413  
gcdH PA0447  
aroC PA1681  
glnA PA5119  
PA5004  
hcp1 PA0085  
pmbA PA4472  
hisD PA4448  
murC PA4411  
PA3025  
ihfB himD PA3161  
rlmL PA3048  
PA4131  
PA5201  
topA PA3011  
metN2 PA5503  
PA0269  
glmM PA4749  
PA3913  
clpP1 PA1801  
PA1673  
PA4803  
dsbA PA5489  
PA3046  
PA5225



PA0123  
PA2330  
PA3413  
leuA PA3792  
PA3461  
spuC PA0299  
PA5257  
PA0084  
PA0079  
popB PA1708  
PA0622  
mexA PA0425  
PA3185  
speC PA4519  
PA2431  
adhC PA3629  
PA1662  
PA5210  
nrdB PA1155  
PA4423  
PA4881  
PA3455  
hldE rfaE PA4996  
PA5234  
pepP PA5224  
ychF PA4673  
minD PA3244  
clpV1 PA0090  
alkT PA5349  
PA2797  
PA2381  
PA3286  
uvrC PA2585  
pyrB PA0402  
tauB PA3937  
PA3354  
PA4631  
anr PA1544  
PA3053  
PA3330  
pilE PA4556  
argE PA5206  
PA3020  
secF PA3820  
pyrQ PA5541

cheB1 PA1459  
PA5209  
cc4 PA5490  
glyS PA0008  
PA2433  
PA4639  
PA3798  
PA4463  
PA4473  
opgG PA5078  
modA PA1863  
bcp PA1008  
bamB PA3800  
PA3295  
ribH ribE PA4053  
pcaR PA0155  
opr86 bamA PA3648  
eno PA3635  
PA3611  
PA5435  
hexR PA3184  
rpoS PA3622  
ansB PA1337  
pheS PA2740  
lasI PA1432  
PA4686  
idh PA2624  
csrA PA0905  
glpD PA3584  
PA4079  
PA3135  
hupA PA5348  
PA2331  
purH PA4854  
spuD PA0300  
PA5475  
mutL PA4946  
tyrS2 PA0668  
PA4611  
pslB PA2232  
hsIV PA5053  
PA0715  
PA1520  
waaG PA5010  
secD PA3821

argG PA3525  
osmE PA4876  
PA1572  
PA4949  
cysB PA1754  
PA4722  
osmC PA0059  
fadA PA3013  
glcB PA0482  
cysP PA1493  
ppiC2 PA4176  
PA1494  
dapB PA4759  
ileS PA4560  
glpK2 glpK glpK1 PA3582  
soj PA5563  
PA0460  
fpr PA3397  
arnA PA3554  
PA2204  
PA4495  
PA4880  
nusA PA4745  
slyD PA0837  
pill PA0410  
glgE PA2151  
PA0900  
lpxA PA3644  
pilZ PA2960  
PA2760  
PA3459  
glpR PA3583  
icmP PA4370  
PA3919  
hfq PA4944  
PA3327  
PA4132  
PA3173  
PA2462  
pilU PA0396  
PA4336  
purU1 PA4314  
gltA PA1580  
pilH PA0409  
PA4063

piIB PA4526
